# Supplementary material for: The impact of alicyclic substituents on the extraction ability of new family of 1,10-phenanthroline-2,9-diamides
Source: Royal Society of Chemistry journal article supplement (doi:10.1039/d0ra05182a), 2020-01-01
Supplement: d0ra05182a1.pdf [file d0ra05182a1.pdf]

## Supporting Information

### The Impact of Alicyclic Substituents on the Extraction Ability of New Family of 1,10-Phenanthroline-2,9-diamides

Pavel S. Lempert<sup>a\*</sup>, Petr I. Matveev<sup>a</sup>, Alexander V. Yatsenko<sup>a</sup>, Mariia V. Evsiunina<sup>a</sup>,  
Valentine S. Petrov<sup>a</sup>, Boris N. Tarasevich<sup>a</sup>, Vitaly A. Roznyatovsky<sup>a</sup>, Pavel V.  
Dorovatovskii<sup>b</sup>, Victor N. Khrustalev<sup>c,d</sup>, Sergey S. Zhokhov<sup>a</sup>, Vitaly P. Solov'ev<sup>e</sup>, Leonid  
A. Aslanov<sup>a</sup>, Vladimir G. Petrov<sup>a</sup>, Stepan N. Kalmykov<sup>a</sup>, Valentine G. Nenajdenko<sup>a</sup>,  
Yuri A. Ustyniuk<sup>a</sup>

<sup>a</sup> Department of Chemistry, M.V. Lomonosov Moscow State University

<sup>b</sup> National Research Center "Kurchatov Institute"

<sup>c</sup> Department of Inorganic Chemistry, Peoples' Friendship University of Russia

<sup>d</sup> N.D. Zelinsky Institute of Organic Chemistry of Russian Academy of Sciences

<sup>e</sup> Frumkin Institute of Physical Chemistry and Electrochemistry, Russian Academy of Sciences

\* Correspondence to: Pavel S. Lempert, E-mail: [lempert@org.chem.msu.ru](mailto:lempert@org.chem.msu.ru)

#### Table of contents

|                                                                   |         |
|-------------------------------------------------------------------|---------|
| <b>1. Experimental part</b> .....                                 | S2-S8   |
| <b>1.1 Materials</b> .....                                        | S2      |
| <b>1.2 Methods</b> .....                                          | S2      |
| <b>1.3 Synthesis and analytical data</b> .....                    | S4      |
| <b>1.4 Solvent extraction experiments</b> .....                   | S8      |
| <b>2. NMR, IR and HRMS spectra of synthesized compounds</b> ..... | S9-S39  |
| <b>3. Extraction testing data</b> .....                           | S40     |
| <b>4. X-ray analysis data</b> .....                               | S41-S80 |
| <b>Appendix A</b> .....                                           | S81     |
| <b>References</b> .....                                           | S81     |

## 1. Experimental part

### 1.1 Materials

The list of the studied diamides and their labels (**3a-3h**) are presented in table 1.

All syntheses were performed in argon inert atmosphere. Dichloromethane was purified by distillation over calcium hydride prior to use. Triethylamine was purified by simple distillation, previously held for 12 hours over sodium hydroxide. All the cyclic amines which are liquid under normal conditions were purified by simple or vacuum distillation. Carbazole was previously purified by recrystallization from toluene.

*3-Nitrobenzotrifluoride* (“F-3”) analytical grade was purchased from Rhodia (France) and was used as a solvent in the extraction experiments without further purification.

### 1.2 Methods

NMR spectra were recorded using standard 5 mm sample tubes on Agilent 400-MR spectrometer with operating frequencies of 400.1 MHz ( $^1\text{H}$ ) and 100.6 MHz ( $^{13}\text{C}$ ) and Bruker Avance-600 spectrometer with operating frequencies of 600.1 MHz ( $^1\text{H}$ ) and 150.6 MHz ( $^{13}\text{C}$ ). Deuterated solvents  $\text{CDCl}_3$ ,  $\text{THF-d}_8$ , benzene- $\text{d}_6$ , acetonitrile- $\text{d}_3$ , and  $\text{DMSO-d}_6$  for NMR spectra were purchased from commercial sources and used without further purification.

The ROESY spectrum was recorded on the Agilent 400-MR spectrometer using standard ROESYAD pulse sequence with a mixing time 200 msec and an acquisition time 150 msec.

IR spectra were recorded on FTIR spectrometer Nicolet iS5 (Thermo Scientific) using an internal reflectance attachment with diamond optical element – attenuated total reflection (ATR) with  $45^\circ$  angle of incidence. Resolution  $4\text{ cm}^{-1}$ , the number of scans is 32.

IR spectra in  $\text{CCl}_4$  solutions were recorded in a 0.06 cm cuvette with KBr windows at the concentrations of compounds  $0.01\text{ mol}\cdot\text{l}^{-1}$  at room temperature. Ultrasonic bath was used to facilitate dissolution of diamides **3f** – **3h**.

HRMS ESI - mass spectra were recorded on the MicroTof Bruker Daltonics and Orbitrap Elite instruments.

Single crystals of **1**·**DMF**·**H<sub>2</sub>O** and **3f** were obtained upon slow isothermal ( $25^\circ\text{C}$ ) recrystallization of corresponding substances from DMF-ethyl acetate (50/50) mixture, single crystals of **3a** were obtained upon slow adding of n-hexane to a solution of **3a** in ethyl acetate-chloroform (50/50) mixture, and **3b**·**H<sub>2</sub>O** – by recrystallization of **3b** from acetonitrile.

X-ray diffraction experiments for **1**·**DMF**·**H<sub>2</sub>O** and **3f** were performed on the “Belok”

beamline of the National Research Center “Kurchatov Institute” (Moscow, Russian Federation) using a Rayonix SX165 CCD detector and X-ray radiation with  $\lambda = 0.78790 \text{ \AA}$  and  $0.79272 \text{ \AA}$  for **1·DMF·H<sub>2</sub>O** and **3f**, respectively. For **3a** and **3b·H<sub>2</sub>O**, the STOE STADIVARI diffractometer equipped with the fine-focus Cu GeniX 3D radiation source ( $\lambda = 1.54186 \text{ \AA}$ ) and a Pilatus 100K detector was used. For **1·DMF·H<sub>2</sub>O** and **3f**, data reduction procedure was carried out with the *iMOSFLM* program from the CCP4 program set<sup>1</sup>, absorption correction was performed with the *SCALA* program<sup>2</sup>, whereas for **3a** and **3b·H<sub>2</sub>O**, the STOE X-AREA program was applied. All structures were determined by direct methods and refined by full-matrix least-squares on  $F^2$  with all non-H atoms given anisotropically. Hydrogen atoms of hydroxy groups and water molecule in **1·DMF·H<sub>2</sub>O** were located from difference Fourier maps and refined isotropically with  $U_{\text{iso}}(\text{H}) = 1.5U_{\text{eq}}(\text{O})$ . For **3b·H<sub>2</sub>O**, we failed to determine the positions of water molecule H atoms, which seem to be disordered. All other H atoms were positioned geometrically and refined as riding on parent C atoms with  $U_{\text{iso}}(\text{H}) = 1.5U_{\text{eq}}(\text{C})$  for methyl groups and  $U_{\text{iso}}(\text{H}) = 1.2U_{\text{eq}}(\text{C})$  for all other H atoms. For **1·DMF·H<sub>2</sub>O** and **3f**, all calculations were performed with SHELXTL<sup>3a</sup>, whereas for **3a** and **3b·H<sub>2</sub>O** SHELXT<sup>3b</sup> was used for the structure solution and SHELXL<sup>3a</sup> – for the refinement. Full crystallographic data are deposited in Cambridge Structural Database, deposition numbers 1938798 (**1·DMF·H<sub>2</sub>O**), 1988714 (**3a**), 1983770 (**3b·H<sub>2</sub>O**), 1938799 (**3f**). Selected crystal data for the studied compounds are presented below:

**1·DMF·H<sub>2</sub>O**:  $\text{C}_{17}\text{H}_{15}\text{Cl}_2\text{N}_3\text{O}_6$ ,  $M_r = 428.22$ , triclinic,  $P-1$ ,  $a = 7.158(1)$ ,  $b = 8.352(2)$ ,  $c = 15.356(3) \text{ \AA}$ ,  $\alpha = 81.10(3)$ ,  $\beta = 82.92(3)$ ,  $\gamma = 78.62(3)^\circ$ ,  $V = 885.1(3) \text{ \AA}^3$ ,  $Z = 2$ ,  $d_c = 1.607 \text{ g cm}^{-3}$ ,  $\mu = 0.538 \text{ mm}^{-1}$ ,  $F(000) = 440$ ,  $T = 100(2) \text{ K}$ ,  $T_{\text{min}}/T_{\text{max}} = 0.890/0.980$ ,  $2\theta_{\text{max}} = 61.52^\circ$ , 15682 reflections, 4025 unique ( $R_{\text{int}} = 0.028$ ),  $R_1 = 0.031$  for 3711 reflections with  $I > 2\sigma(I)$ ,  $wR_2 = 0.089$  for all reflections and 268 refined parameters, GoF on  $F^2 = 1.073$ .

**3a**:  $\text{C}_{22}\text{H}_{20}\text{Cl}_2\text{N}_4\text{O}_2$ ,  $M_r = 443.32$ , triclinic,  $P-1$ ,  $a = 7.7488(3)$ ,  $b = 10.1002(4)$ ,  $c = 13.5780(5) \text{ \AA}$ ,  $\alpha = 79.974(3)$ ,  $\beta = 76.276(3)$ ,  $\gamma = 83.821(3)^\circ$ ,  $V = 1014.12(7) \text{ \AA}^3$ ,  $Z = 2$ ,  $d_c = 1.452 \text{ g cm}^{-3}$ ,  $\mu = 3.11 \text{ mm}^{-1}$ ,  $F(000) = 460$ ,  $T = 293(2) \text{ K}$ ,  $T_{\text{min}}/T_{\text{max}} = 0.672/0.953$ ,  $2\theta_{\text{max}} = 135.95^\circ$ , 8085 reflections, 3593 unique ( $R_{\text{int}} = 0.023$ ),  $R_1 = 0.043$  for 2581 reflections with  $I > 2\sigma(I)$ ,  $wR_2 = 0.129$  for all reflections and 281 refined parameters, GoF on  $F^2 = 1.025$ .

**3b·H<sub>2</sub>O**:  $\text{C}_{24}\text{H}_{26}\text{Cl}_2\text{N}_4\text{O}_3$ ,  $M_r = 489.39$ , monoclinic,  $C2/c$ ,  $a = 36.3267(15)$ ,  $b = 6.8415(2)$ ,  $c = 22.1880(11) \text{ \AA}$ ,  $\beta = 122.928(3)$ ,  $V = 4628.5(4) \text{ \AA}^3$ ,  $Z = 8$ ,  $d_c = 1.405 \text{ g cm}^{-3}$ ,  $\mu = 2.81 \text{ mm}^{-1}$ ,  $F(000) = 2048$ ,  $T = 293(2) \text{ K}$ ,  $T_{\text{min}}/T_{\text{max}} = 0.865/0.972$ ,  $2\theta_{\text{max}} = 135.37^\circ$ , 26181 reflections, 4179 unique ( $R_{\text{int}} = 0.113$ ),  $R_1 = 0.036$  for 2196 reflections with  $I > 2\sigma(I)$ ,  $wR_2 = 0.072$  for all reflections and 298 refined parameters, GoF on  $F^2 = 0.846$ .

**3f:** C<sub>30</sub>H<sub>20</sub>Cl<sub>2</sub>N<sub>4</sub>O<sub>2</sub>, M<sub>r</sub> = 539.40, triclinic, *P*-1, *a* = 7.2410(14), *b* = 11.680(2), *c* = 14.506(3) Å, α = 103.259(14), β = 95.030(2), γ = 97.662(18)°, *V* = 1174.6(4) Å<sup>3</sup>, *Z* = 2, *d<sub>c</sub>* = 1.525 g cm<sup>-3</sup>, μ = 0.420 mm<sup>-1</sup>, *F*(000) = 556, *T* = 100(2) K, *T<sub>min</sub>*/*T<sub>max</sub>* = 0.93/0.97, 2θ<sub>max</sub> = 61.92°, 18379 reflections, 5233 unique (*R<sub>int</sub>* = 0.078), *R*<sub>1</sub> = 0.059 for 3967 reflections with *I* > 2σ(*I*), *wR*<sub>2</sub> = 0.153 for all reflections and 344 refined parameters, GoF on *F*<sup>2</sup> = 1.021.

Detailed crystallographic data provided here in Chapter 3 (see below, from page S40).

### 1.3 Synthesis and analytical data

#### *4,7-dichloro-1,10-phenanthroline-2,9-dicarbonyl chloride 2*

0.35 Mol (118 g) of thoroughly dried dicarboxylic acid **1** was added to 1.4 l of SOCl<sub>2</sub> at room temperature and stirring. 100 μl of DMF was added to the resulting suspension and the reaction mixture was stirred for 4 hours at 50°C. After that, SOCl<sub>2</sub> was removed at low pressure (200 Torr), then 250 ml of dry benzene was added to the residue, and then the solvent was distilled off again. Absolute diethyl ether was added to the solid rest. It was washed on a filter with cold ether, after that the product **2** was dried in vacuum to a constant mass. Yield 95%, pale-yellow fibers, T.decomp. > 220°C, <sup>1</sup>H NMR (400 MHz, CDCl<sub>3</sub>) δ 8.58 (s, 2H), 8.52 (s, 2H).

#### *General method for synthesis of diamides 3a–e*

A solution of the corresponding cyclic amine (50 mmol) in 5 ml of methylene chloride was added at -20°C under vigorous stirring to a suspension of 10 mmol (3.74 g) of chloride **2** in 25 ml of methylene chloride. Then the reaction mixture was allowed to reach room temperature and stirred overnight. Next, the reaction mixture was diluted with 50 ml of methylene chloride, washed with water (2 × 50 ml), dried over sodium sulfate, and the solvent was distilled off. The residue was treated with hexane, recrystallized from a mixture of chloroform/hexane, obtaining the desired product in the form of a white or slightly colored solid.

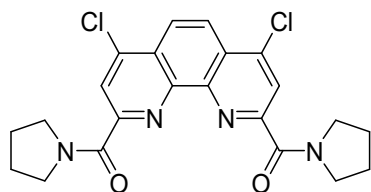

**(4,7-Dichloro-9-(pyrrolidin-1-ylcarbonyl)-1,10-phenanthroline-2-yl)(pyrrolidin-1-yl)methanone 3a.** Yield 82 % (3.64 g), yellowish powder, m.p. 245-247°C, *R<sub>f</sub>* 0.78 (acetone); <sup>1</sup>H NMR (400 MHz, CDCl<sub>3</sub>) δ 8.36 (s, 2H), 8.31 (s, 2H), 4.09 (t, *J* = 6.5 Hz, 4H), 3.74 (t, *J* = 6.5 Hz, 4H), 2.01 – 1.91 (m, 8H); <sup>13</sup>C NMR (101 MHz, CDCl<sub>3</sub>) δ 164.9, 154.3, 145.2, 143.8,

127.5, 124.4, 124.2, 49.2, 47.3, 26.9, 24.2; IR ( $\text{cm}^{-1}$ ) 3095, 3073, 2968, 2878 (C-H stretching vibrations), 1634, 1622, 1615 (C=O), 1573, 1522, 1449, 1437, 1416 (C=C, C=N); HRMS (ESI-TOF) ( $m/z$ )  $[\text{M}+\text{H}]^+$  calculated for  $\text{C}_{22}\text{H}_{21}\text{Cl}_2\text{N}_4\text{O}_2$  443.1037, found 443.1034.

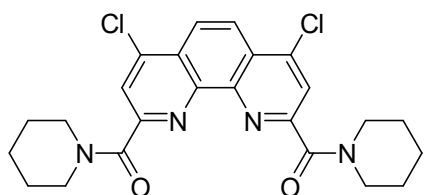

**(4,7-Dichloro-9-(piperidin-1-ylcarbonyl)-1,10-phenanthrolin-2-yl)(piperidin-1-yl)methanone 3b.** Yield 81 % (3.82 g), white powder, m.p. 249-251°C,  $R_f$  0.58 (acetone: $\text{CH}_2\text{Cl}_2$  1:4);  $^1\text{H}$  NMR (400 MHz,  $\text{CDCl}_3$ )  $\delta$  8.36 (s, 2H), 8.10 (s, 2H), 3.79 (t,  $J = 5.3$  Hz, 4H), 3.72 (t,  $J = 5.3$  Hz, 4H), 1.82 – 1.59 (m, 12H);  $^{13}\text{C}$  NMR (101 MHz,  $\text{CDCl}_3$ )  $\delta$  166.0, 154.5, 145.3, 143.9, 127.3, 124.3, 124.0, 48.7, 43.9, 26.7, 25.7, 24.7; IR ( $\text{cm}^{-1}$ ) 3084, 3043, 2938, 2914, 2843 (C-H stretching vibrations), 1634, 1626 (C=O), 1571, 1532, 1456, 1446, 1425 (C=C, C=N); HRMS (ESI-TOF) ( $m/z$ )  $[\text{M}+\text{H}]^+$  calculated for  $\text{C}_{24}\text{H}_{25}\text{Cl}_2\text{N}_4\text{O}_2$  471.1350, found 471.1335.

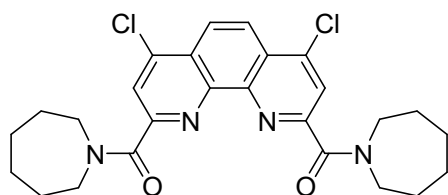

**Azepan-1-yl(9-(azepan-1-ylcarbonyl)-4,7-dichloro-1,10-phenanthrolin-2-yl)methanone 3c.** Yield 82 % (4.10 g), white powder, m.p. 238-241°C,  $R_f$  0.53 (acetone: $\text{CH}_2\text{Cl}_2$  1:5),  $^1\text{H}$  NMR (400 MHz,  $\text{CDCl}_3$ )  $\delta$  8.38 (s, 2H), 8.11 (s, 2H), 3.82 – 3.72 (m, 8H), 1.90 (p,  $J = 5.9$  Hz, 4H), 1.78 (p,  $J = 5.9$  Hz, 4H), 1.71 – 1.57 (m, 8H);  $^{13}\text{C}$  NMR (101 MHz,  $\text{CDCl}_3$ )  $\delta$  167.6, 154.9, 145.4, 143.8, 127.3, 124.1, 124.0, 49.9, 47.4, 29.6, 27.6, 27.3, 27.0; IR ( $\text{cm}^{-1}$ ) 3037, 2926, 2853 (C-H stretching vibrations), 1634, 1631, 1626 (C=O), 1590, 1530, 1456, 1427 (C=C, C=N); HRMS (ESI-TOF) ( $m/z$ )  $[\text{M}+\text{H}]^+$  calculated for  $\text{C}_{26}\text{H}_{29}\text{Cl}_2\text{N}_4\text{O}_2$  499.1663, found 499.1662.

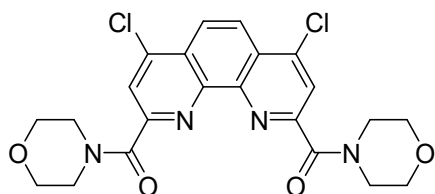

**(4,7-dichloro-9-(morpholin-4-ylcarbonyl)-1,10-phenanthrolin-2-yl)(morpholin-4-yl)methanone 3d.** Yield 71 % (3.37 g), white powder, m.p. 236-238°C,  $R_f$  0.75 (acetone:CH<sub>2</sub>Cl<sub>2</sub> 1:1); <sup>1</sup>H NMR (400 MHz, CDCl<sub>3</sub>),  $\delta$  8.41 (s, 2H), 8.21 (s, 2H), 3.98 (t,  $J$  = 4.8 Hz, 4H), 3.95 – 3.83 (m, 8H), 3.75 (t,  $J$  = 4.8 Hz, 4H); <sup>13</sup>C NMR (101 MHz, CDCl<sub>3</sub>)  $\delta$  165.8, 153.5, 145.1, 144.3, 127.6, 124.9, 124.3, 67.3, 67.0, 48.2, 43.3; IR (cm<sup>-1</sup>) 3093, 3026, 2966, 2912, 2852 (C-H stretching vibrations), 1644, 1640, 1634, 1634, 1628, (C=O), 1570, 1528, 1475, 1462, 1444, 1427 (C=C, C=N); HRMS (ESI-TOF) ( $m/z$ ) [M+H]<sup>+</sup> calculated for C<sub>22</sub>H<sub>21</sub>Cl<sub>2</sub>N<sub>4</sub>O<sub>4</sub> 475.0935, found 475.0928.

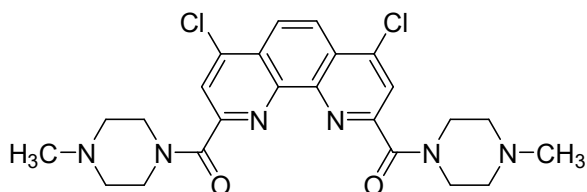

**(4,7-dichloro-9-((4-methylpiperazin-1-yl)carbonyl)-1,10-phenanthrolin-2-yl)(4-methylpiperazin-1-yl)methanone 3e.** Yield 79 % (3.96 g), white powder, m.p. 235-238°C; <sup>1</sup>H NMR (400 MHz, CDCl<sub>3</sub>)  $\delta$  8.39 (s, 2H), 8.17 (s, 2H), 3.98 – 3.87 (m, 8H), 2.55 (t,  $J$  = 5.0 Hz, 4H), 2.42 (t,  $J$  = 5.0 Hz, 4H), 2.32 (s, 6H); <sup>13</sup>C NMR (101 MHz, CDCl<sub>3</sub>)  $\delta$  165.8, 153.9, 145.1, 144.1, 127.5, 124.7, 124.2, 55.7, 54.8, 47.5, 46.2, 42.8; IR (cm<sup>-1</sup>) 3041, 2973, 2937, 2894, 2860, 2794, 2749 (C-H stretching vibrations), 1635 (C=O), 1531, 1460, 1446, 1425 (C=C, C=N); HRMS (ESI-TOF) ( $m/z$ ) [M+H]<sup>+</sup> calculated for C<sub>24</sub>H<sub>27</sub>Cl<sub>2</sub>N<sub>6</sub>O<sub>2</sub> 501.1568, found 501.1562.

*General method for synthesis of diamides 3f–h*

Triethylamine (30 mmol, 3.04 g, 4.20 ml) was added to a suspension of 10 mmol (3.74 g) of chloride **2** in 25 ml of methylene chloride at -20 °C under vigorous stirring and then the solution of the corresponding secondary amine (22.5 mmol) in 10 ml of methylene chloride was added dropwise. After that, the reaction mixture was stirred at -20 °C for 1 hour, allowed to reach the room temperature and was additionally stirred for 24 hours. Then it was washed with water (2 × 50 ml), dried over sodium sulfate and the solvent was distilled off. The residue was washed with chloroform, giving the desired product in the form of slightly colored solid.

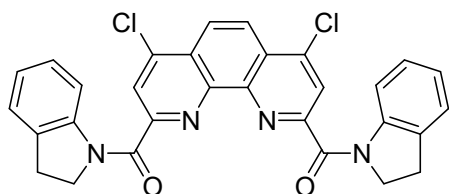

**(4,7-dichloro-9-(2,3-dihydro-1H-indol-1-ylcarbonyl)-1,10-phenanthrolin-2-yl)(2,3-dihydro-1H-indol-1-yl)methanone 3f.** Yield 76 % (4.10 g), yellowish fibers, m.p. 289-290°C,  $R_f$  0.74 (EtOAc:CH<sub>2</sub>Cl<sub>2</sub> 1:10); <sup>1</sup>H NMR (400 MHz, DMSO-*d*<sub>6</sub>, recorded at 343.15 K)  $\delta$  8.56 (s, 2H), 8.39 (s, 2H), 8.20 (bs, 2H), 7.30 (d,  $J$  = 7.8 Hz, 2H), 7.22 (bs, 2H), 7.08 (t,  $J$  = 7.8 Hz, 2H), 4.52 (bs, 4H), 3.17 – 3.05 (m, 4H); IR (cm<sup>-1</sup>) 3109, 3070, 3053, 2971, 2936, 2862 (C-H stretching vibrations), 1634 (C=O), 1597, 1569, 1533, 1481, 1463, 1437, 1403 (C=C, C=N); HRMS (ESI-TOF) ( $m/z$ ) [M+H]<sup>+</sup> calculated for C<sub>30</sub>H<sub>20</sub>Cl<sub>2</sub>N<sub>4</sub>O<sub>2</sub> 539.1045, found 539.1045.

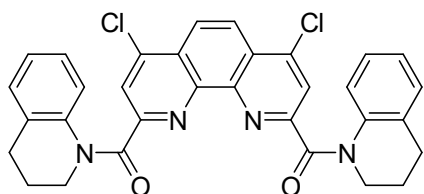

**(4,7-dichloro-9-(1,2,3,4-tetrahydroquinolin-1-ylcarbonyl)-1,10-phenanthrolin-2-yl)-(1,2,3,4-tetrahydroquinolin-1-yl)methanone 3g.** Yield 90 % (5.10 g), yellowish powder, m.p. 238-241°C,  $R_f$  0.59 (EtOAc:CH<sub>2</sub>Cl<sub>2</sub> 1:2); <sup>1</sup>H NMR (400 MHz, C<sub>6</sub>D<sub>6</sub>)  $\delta$  7.96 (s, 2H), 7.84 (s, 2H), 7.62 (bs, 2H), 6.93 – 6.79 (m, 6H), 3.86 – 3.78 (m, 4H), 2.49 (t,  $J$  = 6.8 Hz, 4H), 1.70 – 1.62 (m, 4H); <sup>13</sup>C NMR (101 MHz, C<sub>6</sub>D<sub>6</sub>)  $\delta$  166.9, 155.5, 145.9, 143.3, 139.7, 131.4, 128.9, 127.2, 126.1, 125.3, 124.9, 124.2, 123.8, 46.2, 27.2, 24.1; IR (cm<sup>-1</sup>) 3061, 3042, 2946, 2885, 2843 (C-H stretching vibrations), 1651, 1644, 1640, 1637 (C=O), 1602, 1581, 1571, 1530, 1491, 1450, 1439, 1400 (C=C, C=N); HRMS (ESI-TOF) ( $m/z$ ) [M+H]<sup>+</sup> calculated for C<sub>32</sub>H<sub>25</sub>Cl<sub>2</sub>N<sub>4</sub>O<sub>2</sub> 567.1350, found 567.1349.

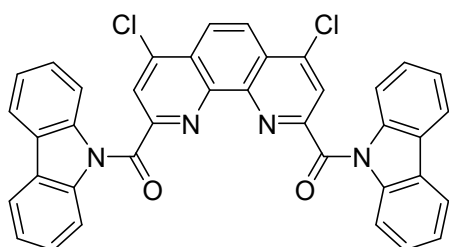

**9H-carbazol-9-yl(9-(9H-carbazol-9-ylcarbonyl)-4,7-dichloro-1,10-phenanthrolin-2-yl)methanone 3h.** Yield 63 % (4.00 g), white powder, m.p. 389-393°C; <sup>1</sup>H NMR (CDCl<sub>3</sub>)  $\delta$ , ppm: <sup>1</sup>H NMR (400 MHz, Chloroform-*d*)  $\delta$  8.61 (s, 2H), 8.22 (s, 2H), 7.80 – 7.73 (m, 4H), 7.31 (d,  $J$  = 8.5 Hz, 4H), 7.16 (td,  $J$  = 7.4, 1.1 Hz, 4H), 7.05 (ddd,  $J$  = 8.5, 7.4, 1.1 Hz, 4H);

IR ( $\text{cm}^{-1}$ ) 3097, 3061 (C-H stretching vibrations), 1674 (C=O), 1527, 1491, 1480, 1444, 1381 (C=C, C=N); HRMS (ESI-TOF) ( $m/z$ )  $[\text{M}+\text{H}]^+$  calculated for  $\text{C}_{38}\text{H}_{21}\text{Cl}_2\text{N}_4\text{O}_2$  635.1035, found 635.1029.

#### 1.4 Solvent extraction experiments

Solvent extraction experiments were carried out as follows. 0.5 ml of organic solution of the extractant in 3-nitrobenzotrifluoride (“F-3”) and 0.5 ml of aqueous phase containing nitric acid and radionuclides were mixed in 1.5 ml polypropylene vial. Three sets of aqueous solutions were prepared for extraction experiments. The first one contained trace concentrations of  $^{241}\text{Am}$  ( $\approx 1500 \text{ Bq}\cdot\text{ml}^{-1}$ ) and  $^{152}\text{Eu}$  ( $\approx 2500 \text{ Bq}\cdot\text{ml}^{-1}$ ), the second set contained  $^{241}\text{Am}$  ( $\approx 1500 \text{ Bq}\cdot\text{ml}^{-1}$ ) and  $^{244}\text{Cm}$  ( $\approx 2000 \text{ Bq}\cdot\text{ml}^{-1}$ ). The third set contained lanthanum and all lanthanides (except promethium) in total concentration  $10^{-4} \text{ mol}\cdot\text{l}^{-1}$ . The phases were stirred for 15 minutes on a vortex shaker at  $25\pm 1^\circ\text{C}$  in an air thermostat. Then samples were centrifuged (5 minutes, 6000 rpm) and aliquots of each phase were taken for determination of radionuclide or lanthanide concentration.

Content of  $^{241}\text{Am}$  ( $E_\gamma = 59.5 \text{ keV}$ ) and  $^{152}\text{Eu}$  ( $E_\gamma = 121.8 \text{ keV}$ ) was determined by gamma-spectrometry using a high-pure germanium detector GR 3818 (Canberra Ind.) in the first set of experiments. Second set of samples was analyzed by alpha-spectrometry ( $E_\alpha(^{241}\text{Am}) = 5637 \text{ keV}$ ,  $E_\alpha(^{244}\text{Cm}) = 5901 \text{ keV}$ ) using an alpha spectrometer Model 7401 with Si detectors (Canberra Ind.). Initial aqueous phase and equilibrium aqueous phases of the third set of samples were analyzed by ICP-OES (Agilent ICP-OES 720).

The distribution ratios ( $D$ ) of metals were calculated for the first set of experiments as the ratio of the counting rate in the organic and aqueous phase. For the second and the third sets of samples activity/concentration in organic phase was calculated as difference between concentrations in initial and equilibrium aqueous phases. The separation factors ( $SF$ ) were calculated as the ratio of the distribution ratios. All extraction experiments were repeated three times. Uncertainties for  $0.01 < D < 100$  are about  $\pm 10\%$ .



## 2. NMR, IR and HRMS spectra of synthesized compounds

### 4,7-dichloro-1,10-phenanthroline-2,9-dicarbonyl chloride 2.

$^1\text{H}$  NMR spectra in  $\text{CDCl}_3$  at  $25^\circ\text{C}$

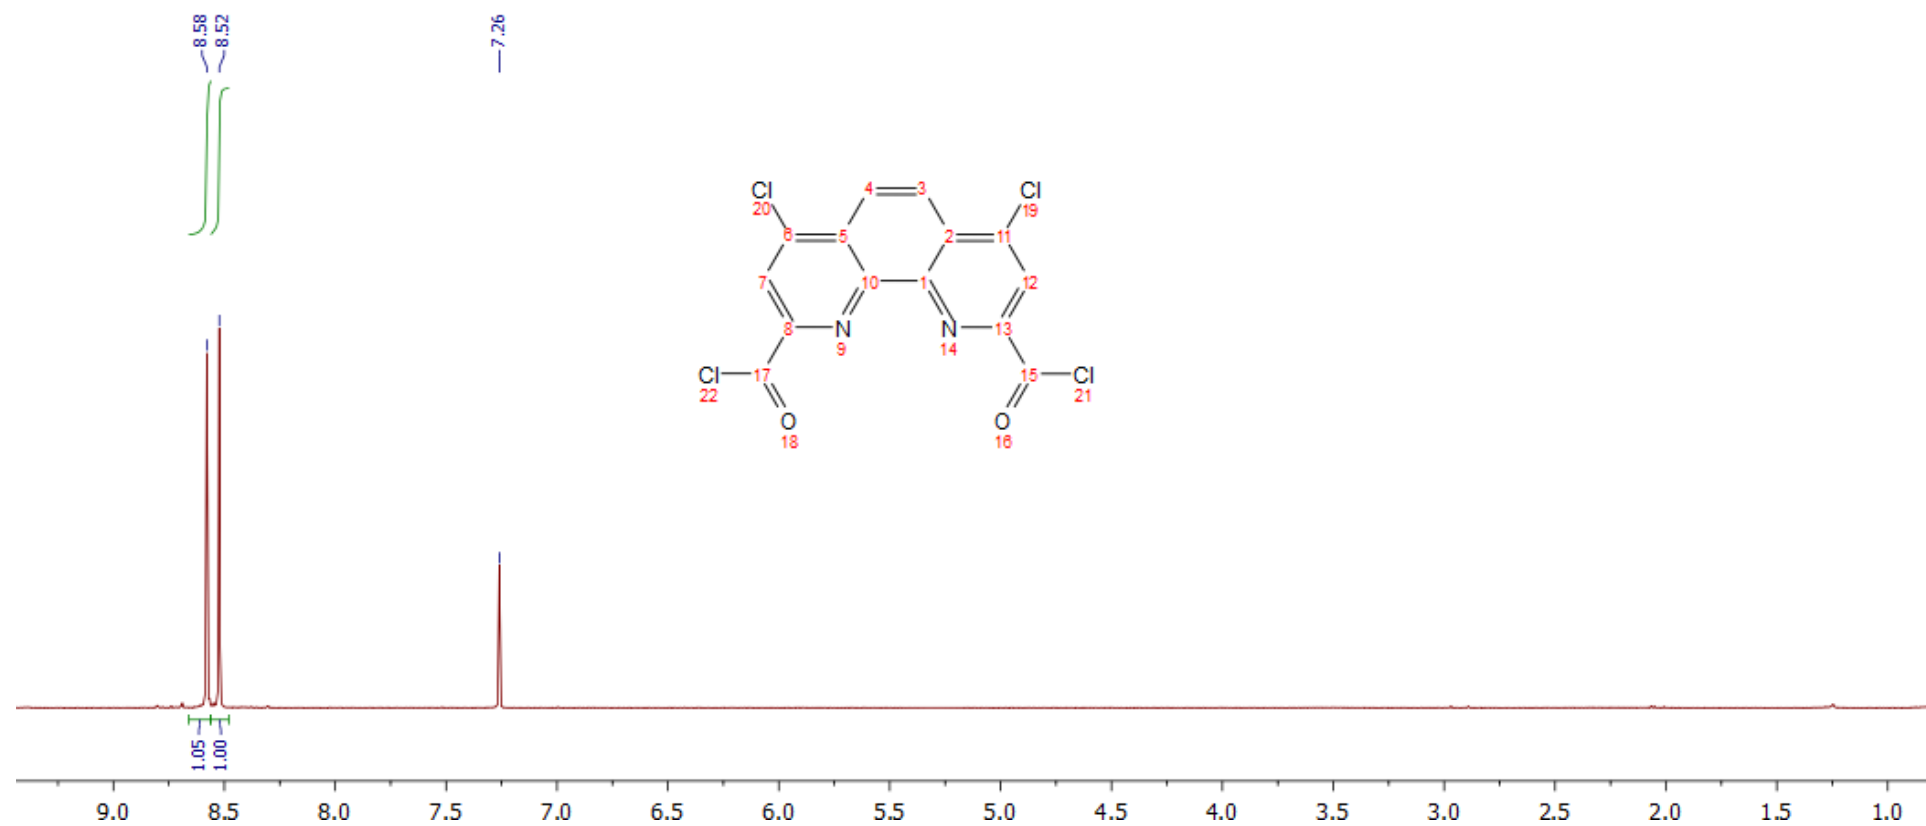

**(4,7-dichloro-9-(pyrrolidin-1-ylcarbonyl)-1,10-phenanthrolin-2-yl)(pyrrolidin-1-yl)methanone 3a**

$^1\text{H}$  NMR (above) and  $^{13}\text{C}$  NMR (below) spectra in  $\text{CDCl}_3$  at  $25^\circ\text{C}$

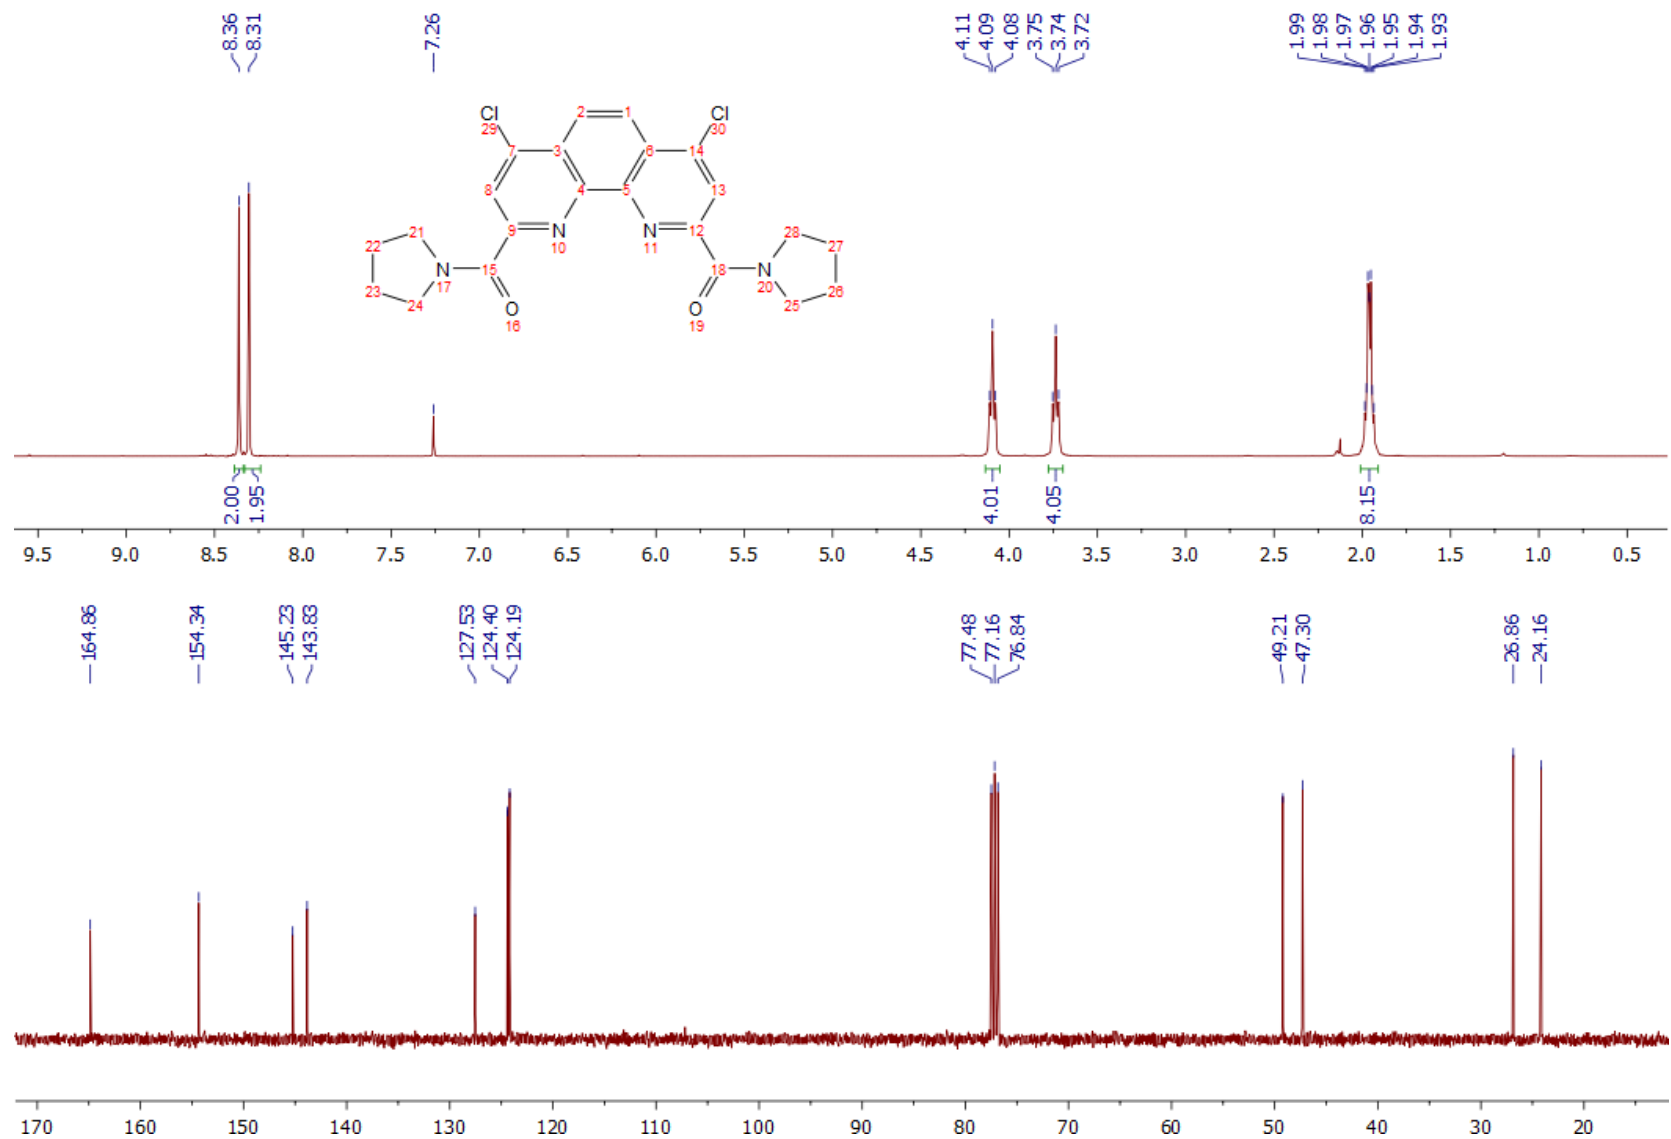

IR spectra at 25°C

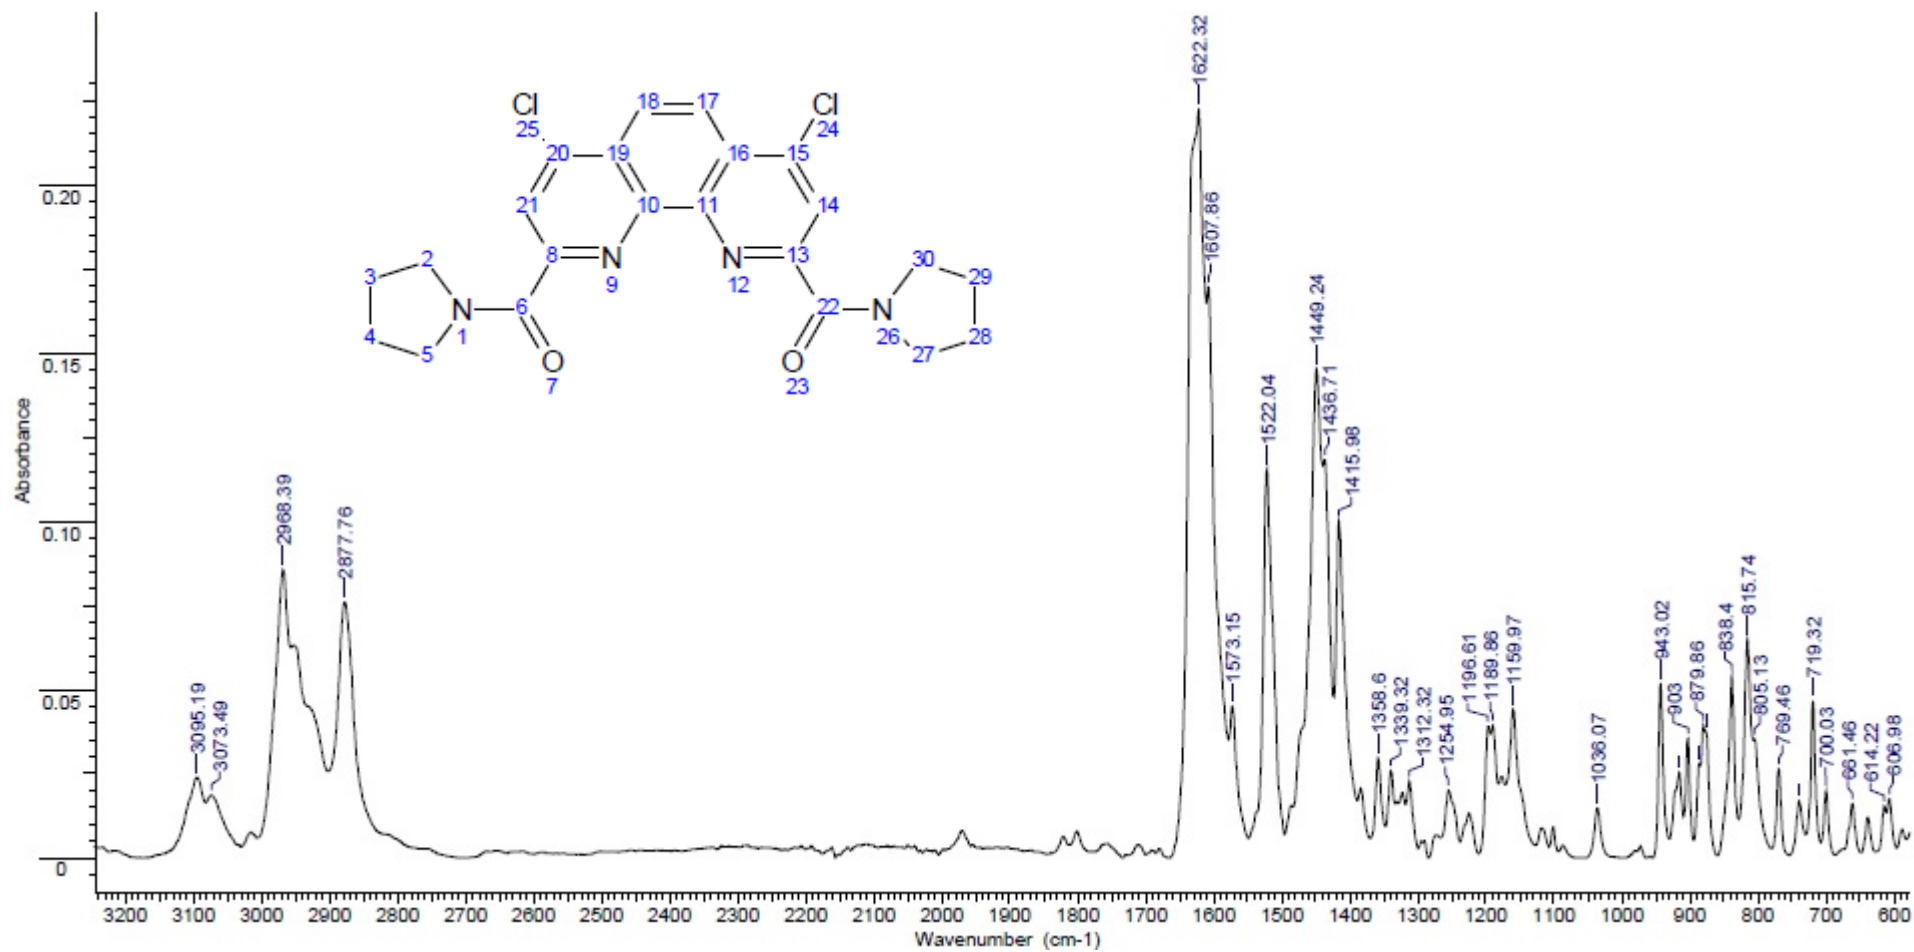

**(4,7-dichloro-9-(piperidin-1-ylcarbonyl)-1,10-phenanthrolin-2-yl)(piperidin-1-yl)methanone 3b**

$^1\text{H}$  NMR (above) and  $^{13}\text{C}$  NMR (below) spectra in  $\text{CDCl}_3$  at  $25^\circ\text{C}$

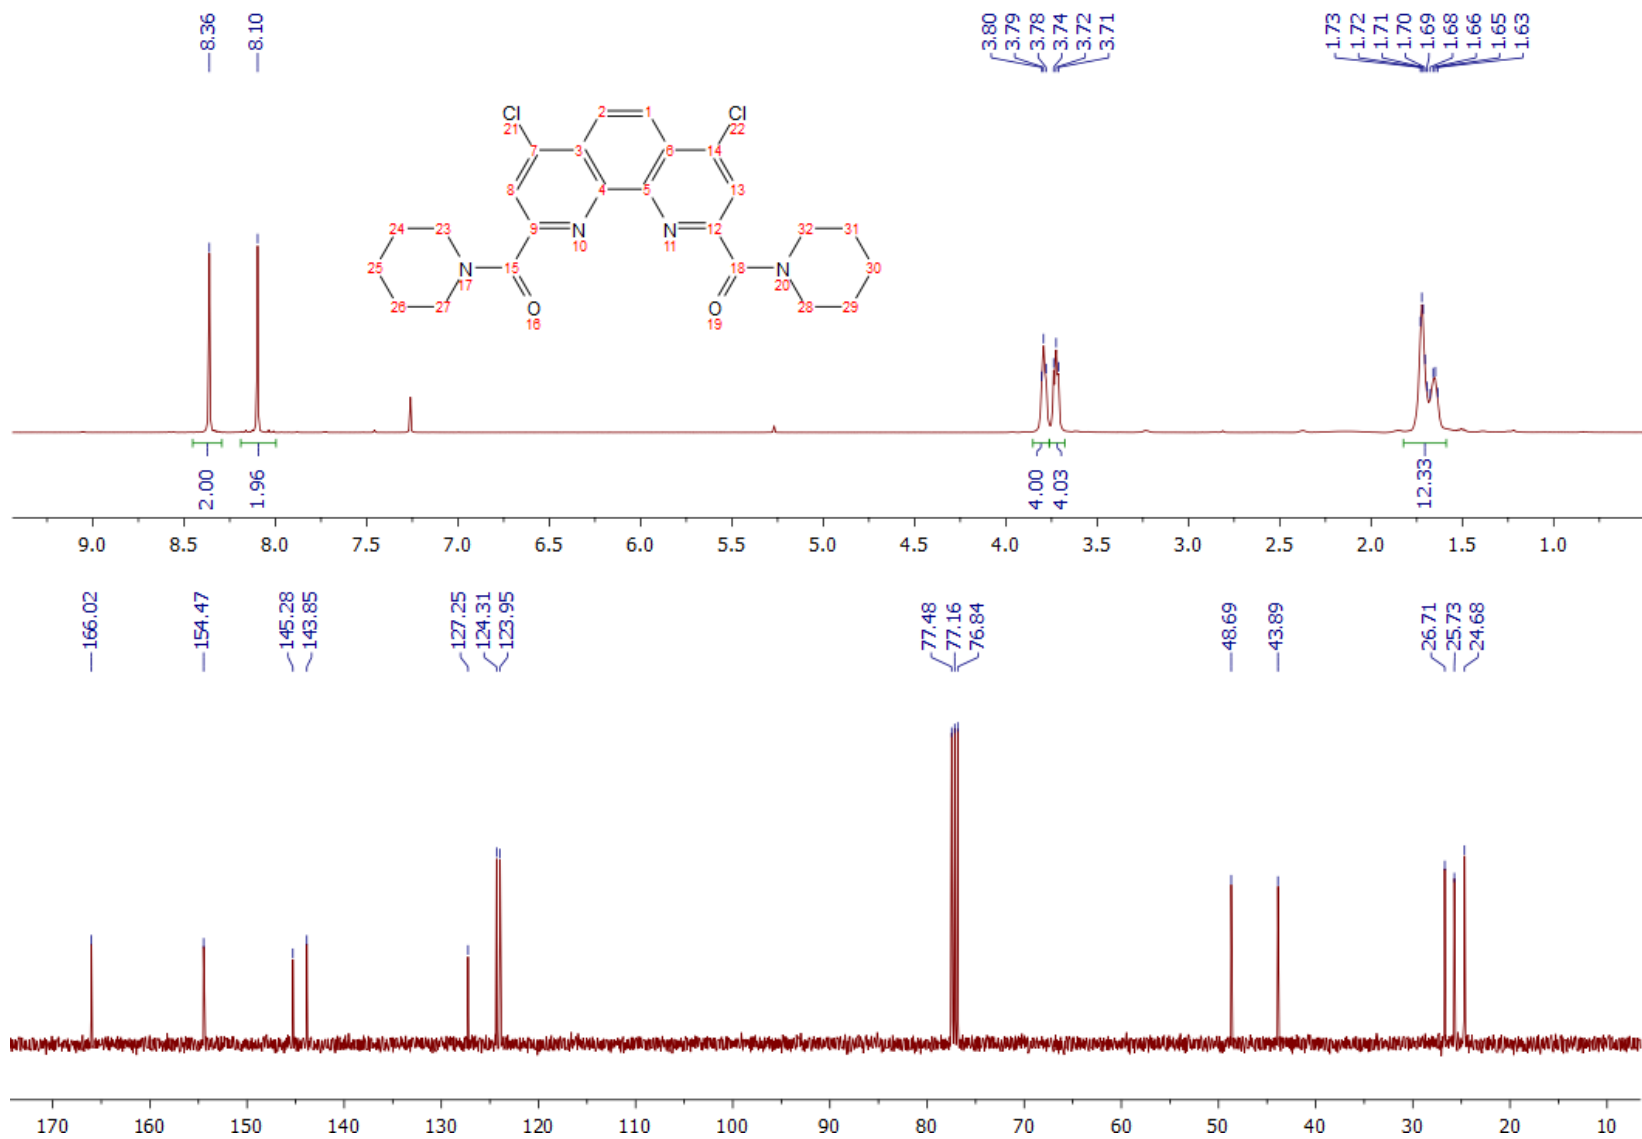

IR spectra at 25°C

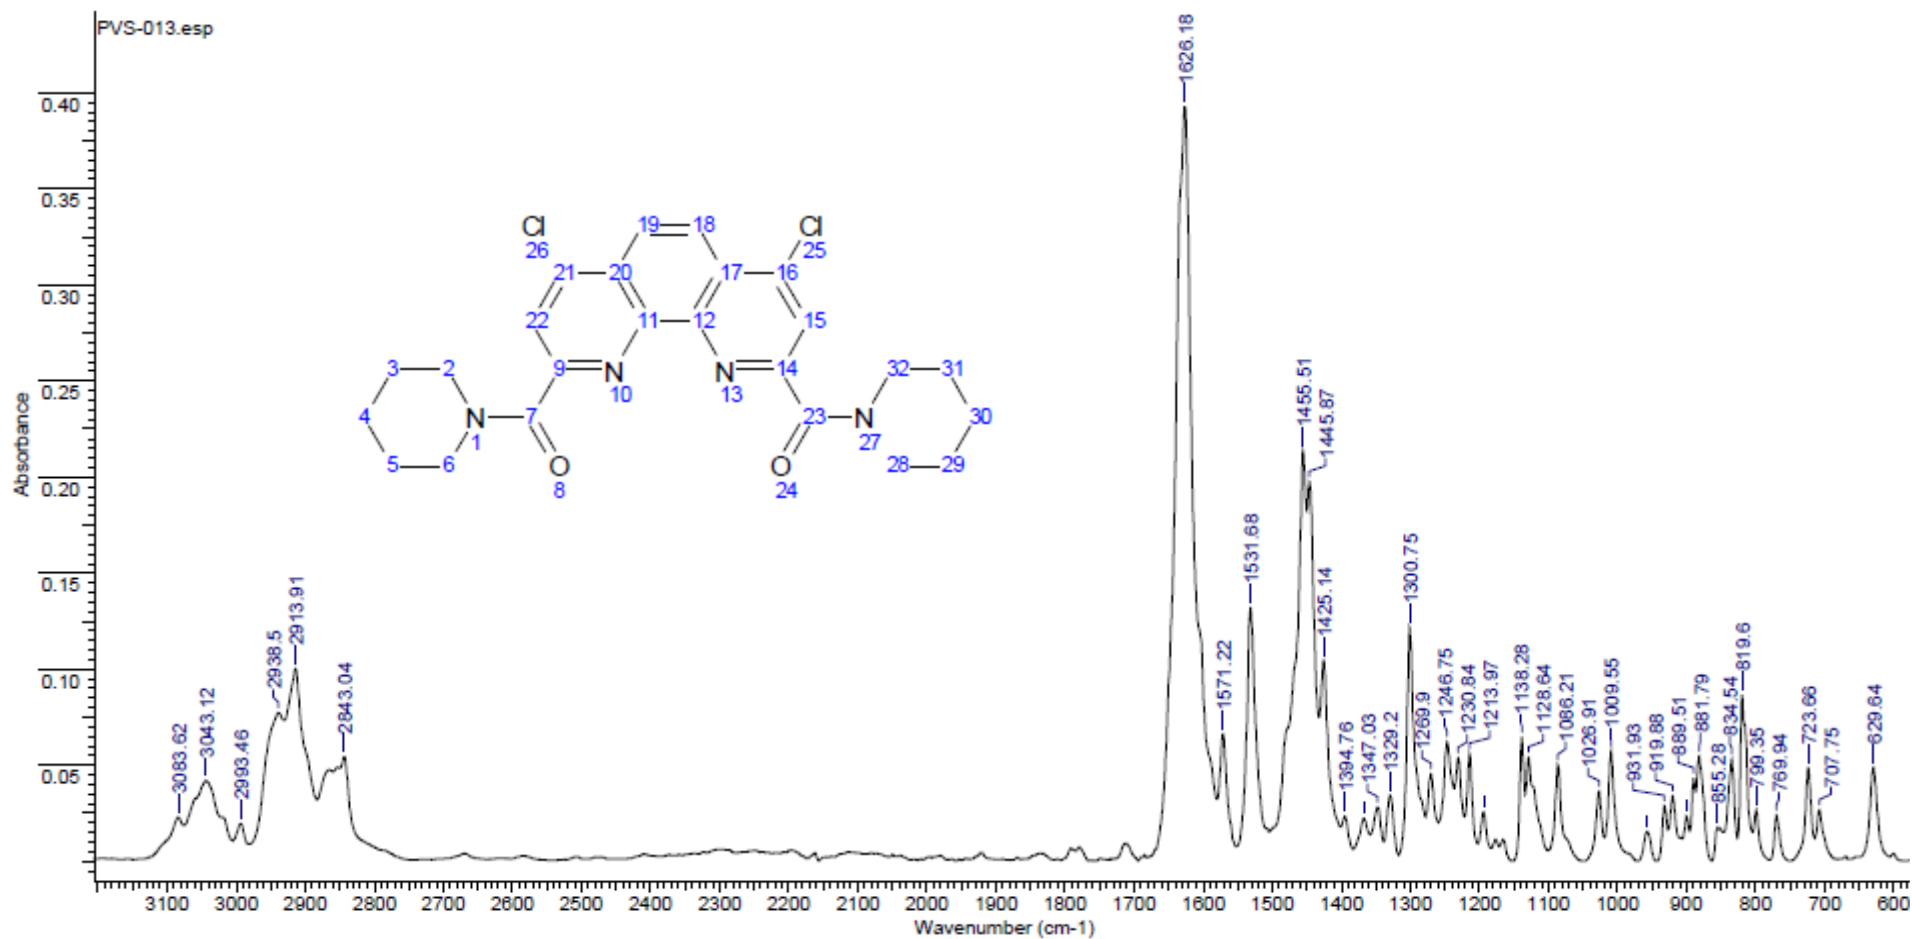

### Azepan-1-yl(9-(azepan-1-ylcarbonyl)-4,7-dichloro-1,10-phenanthrolin-2-yl)methanone 3c

$^1\text{H}$  NMR (above) and  $^{13}\text{C}$  NMR (below) spectra in  $\text{CDCl}_3$  at  $25^\circ\text{C}$

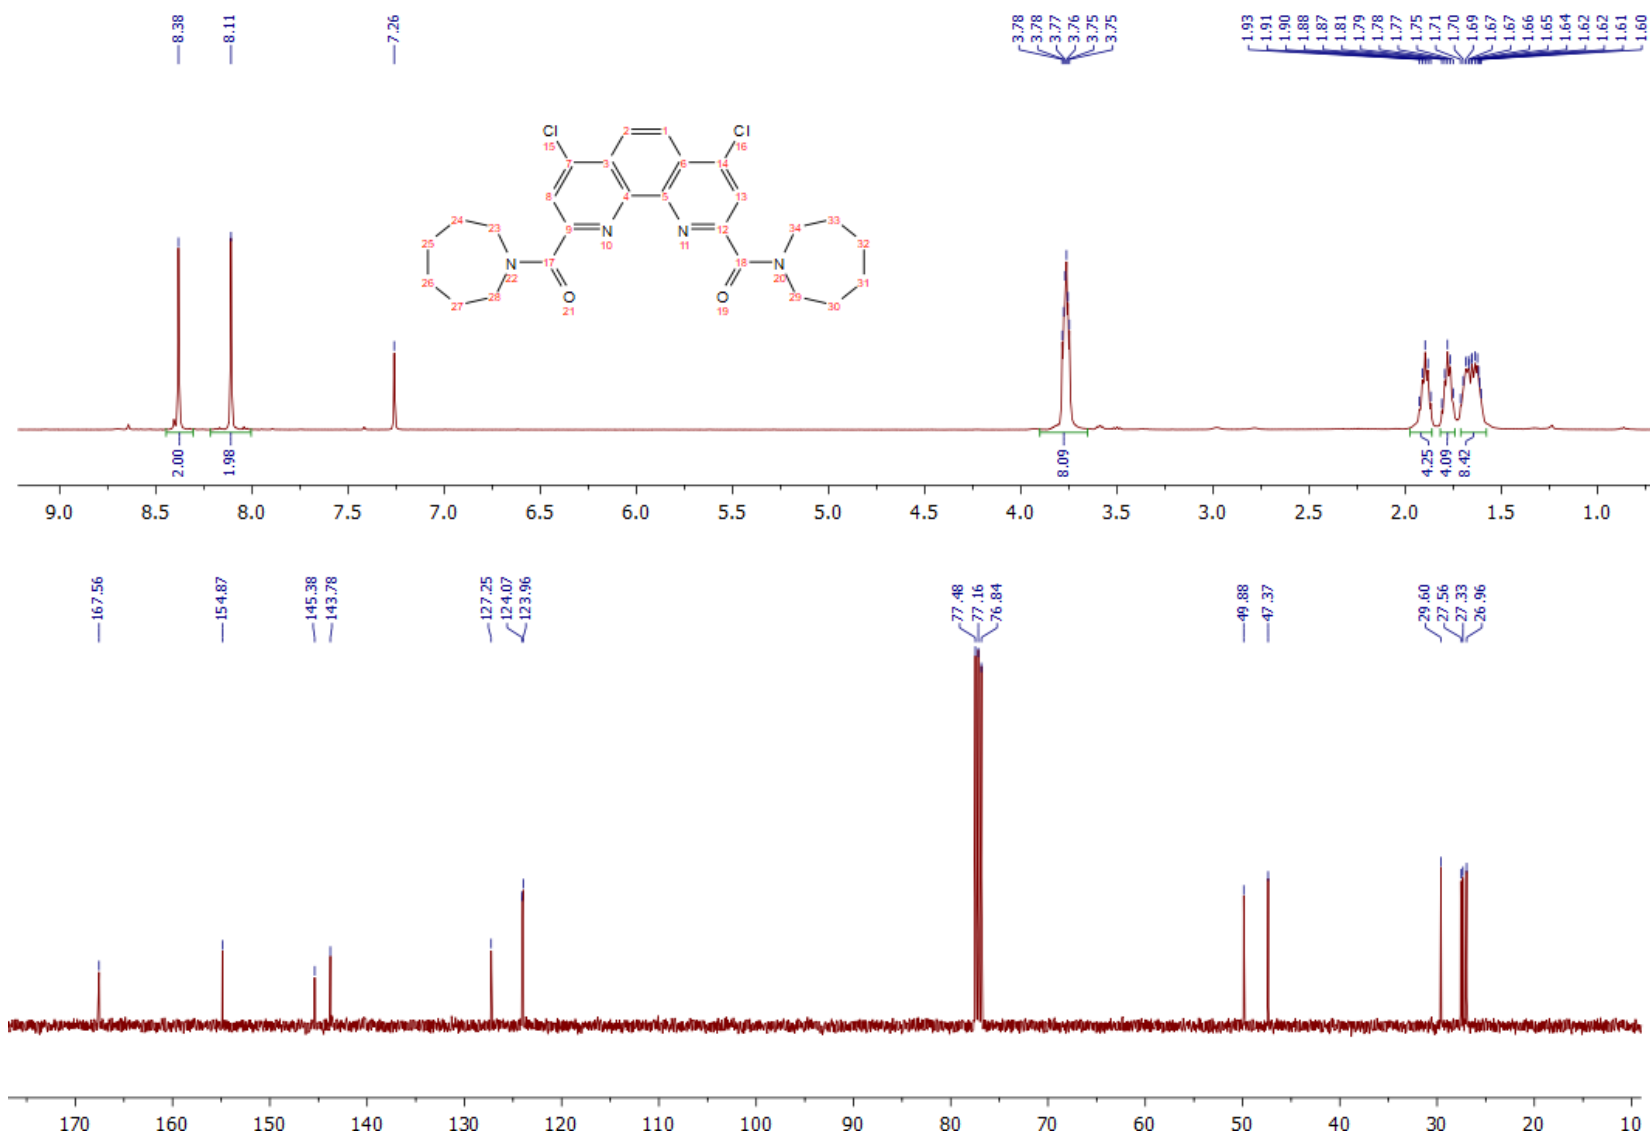

IR spectra at 25°C

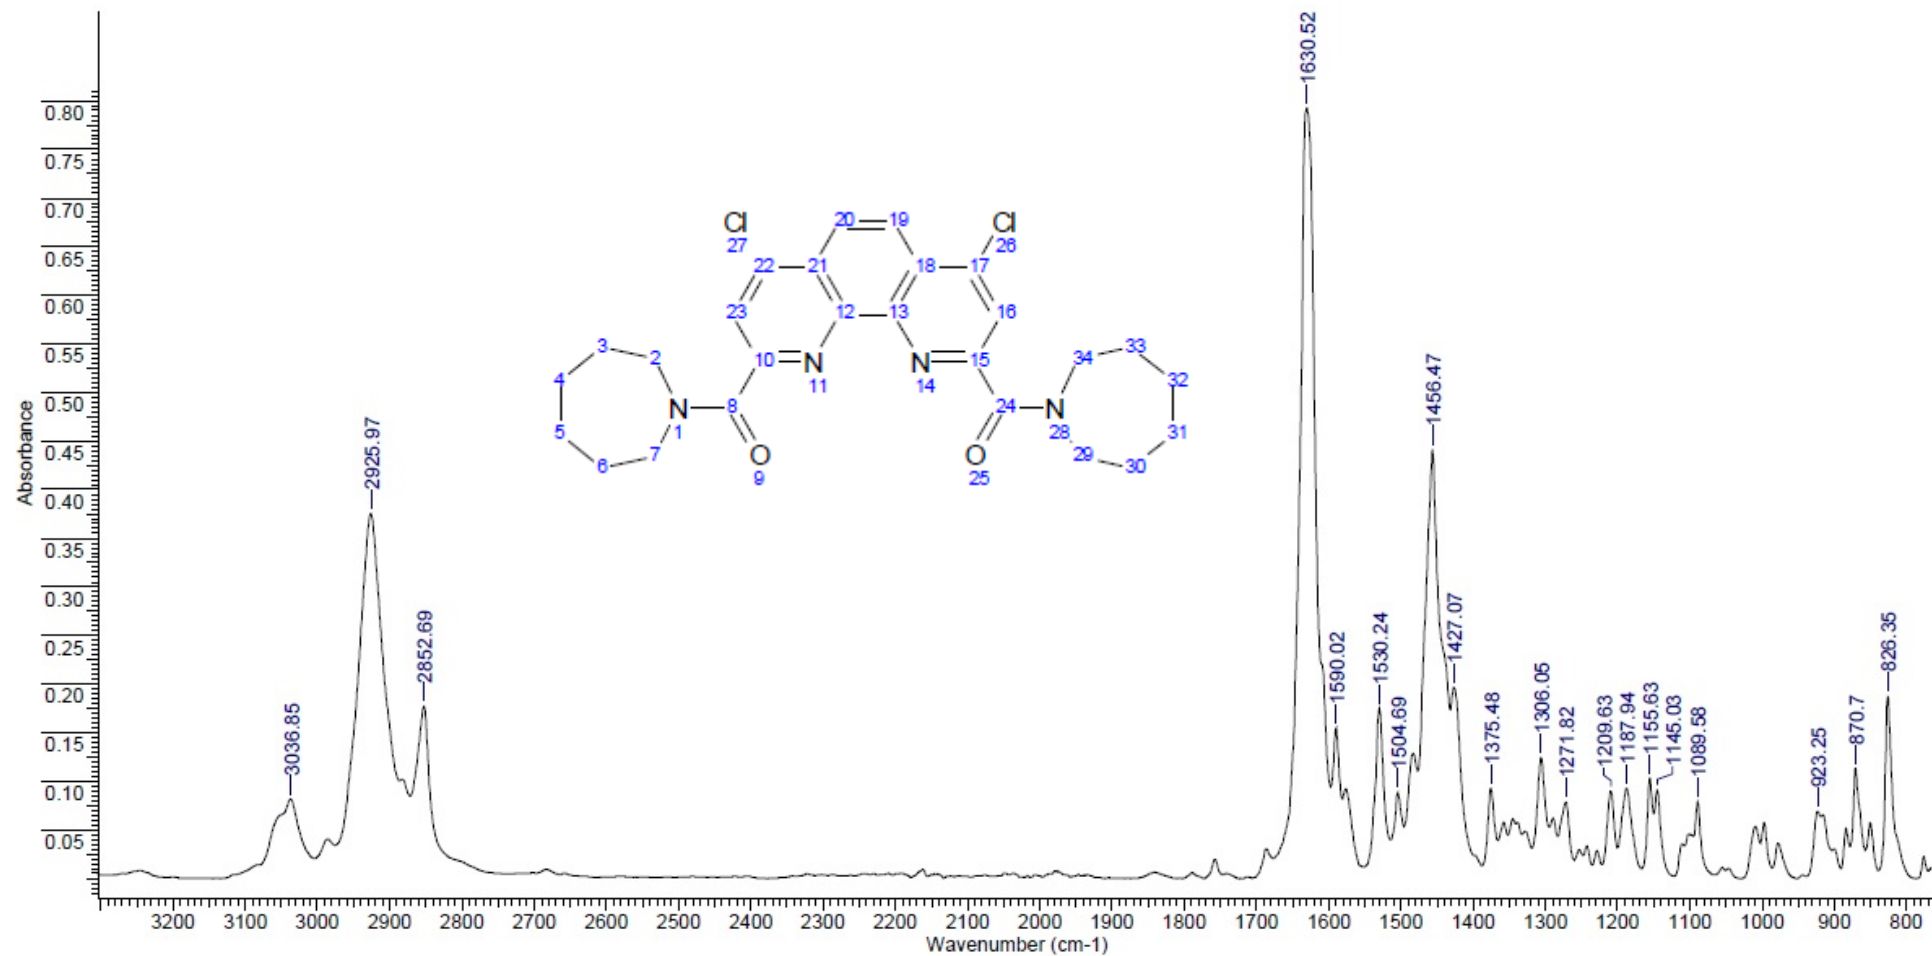

**(4,7-Dichloro-9-(morpholin-4-ylcarbonyl)-1,10-phenanthrolin-2-yl)(morpholin-4-yl)methanone 3d**

$^1\text{H}$  NMR (above) and  $^{13}\text{C}$  NMR (below) spectra in  $\text{CDCl}_3$  at  $25^\circ\text{C}$

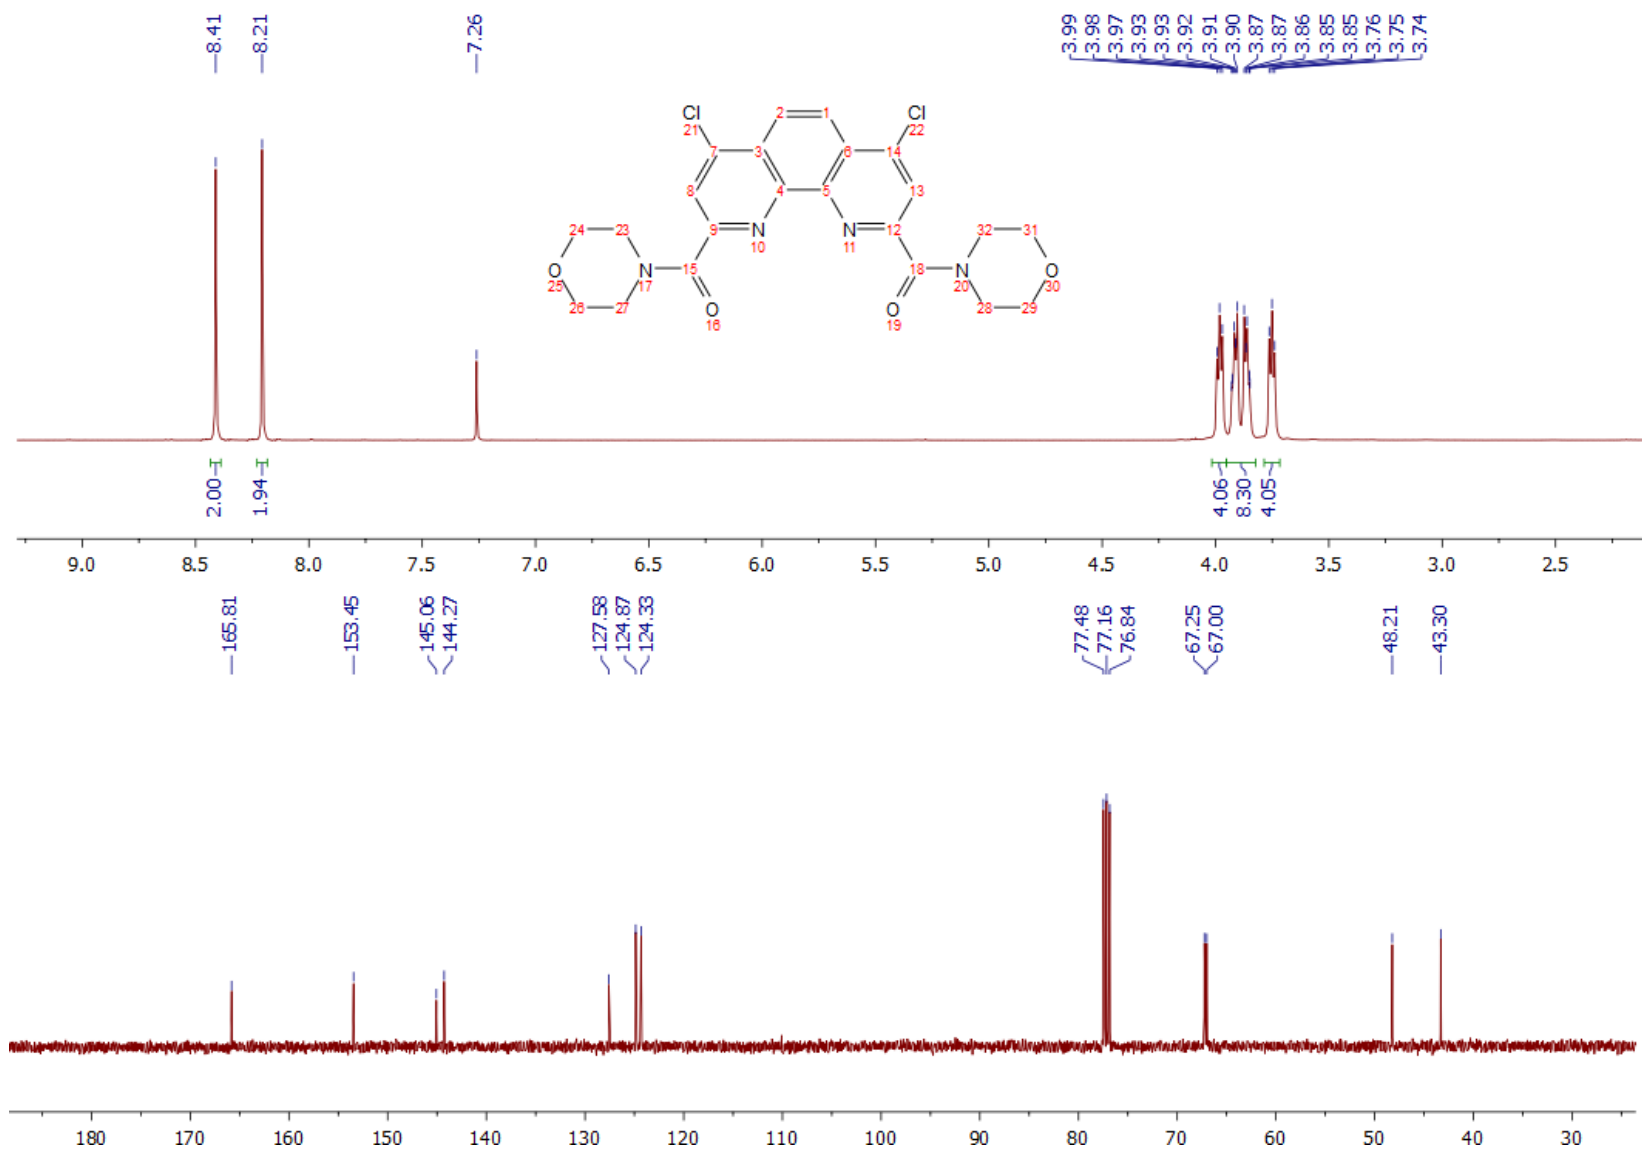



IR spectra at 25°C

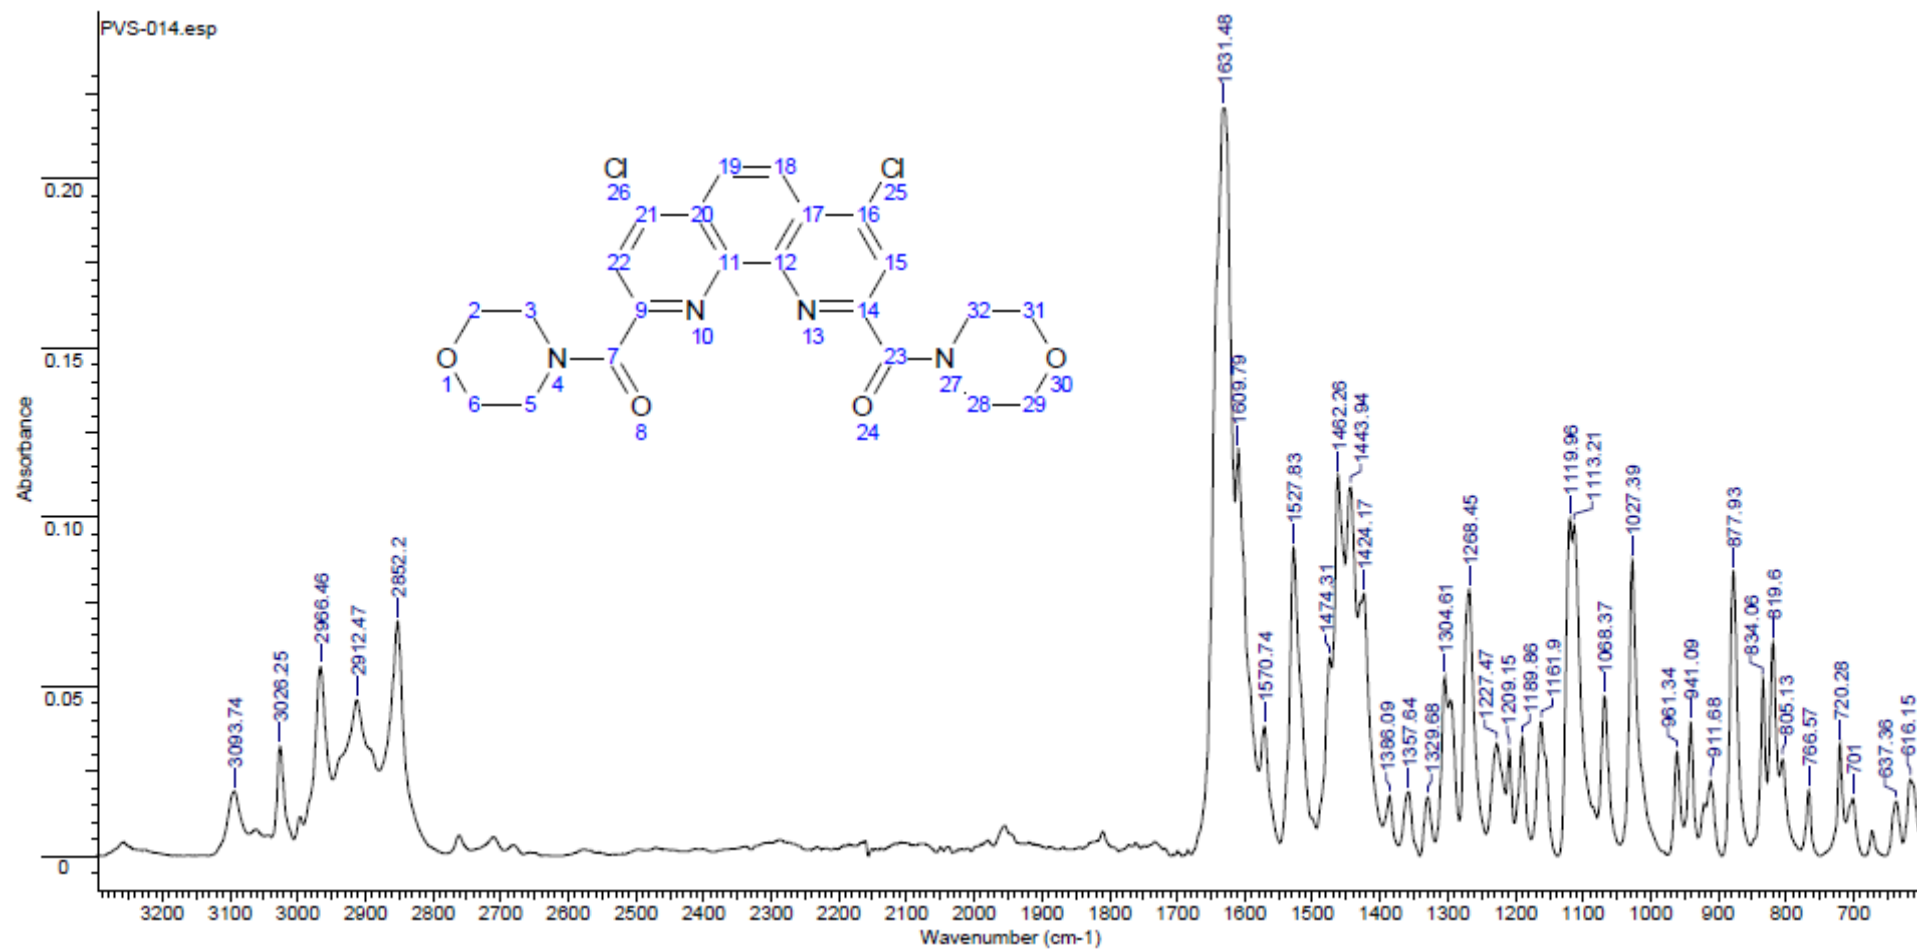

**(4,7-Dichloro-9-((4-methylpiperazin-1-yl)carbonyl)-1,10-phenanthrolin-2-yl)(4-methylpiperazin-1-yl)methanone 3e**

$^1\text{H}$  NMR (above) and  $^{13}\text{C}$  NMR (below) spectra in  $\text{CDCl}_3$  at  $25^\circ\text{C}$

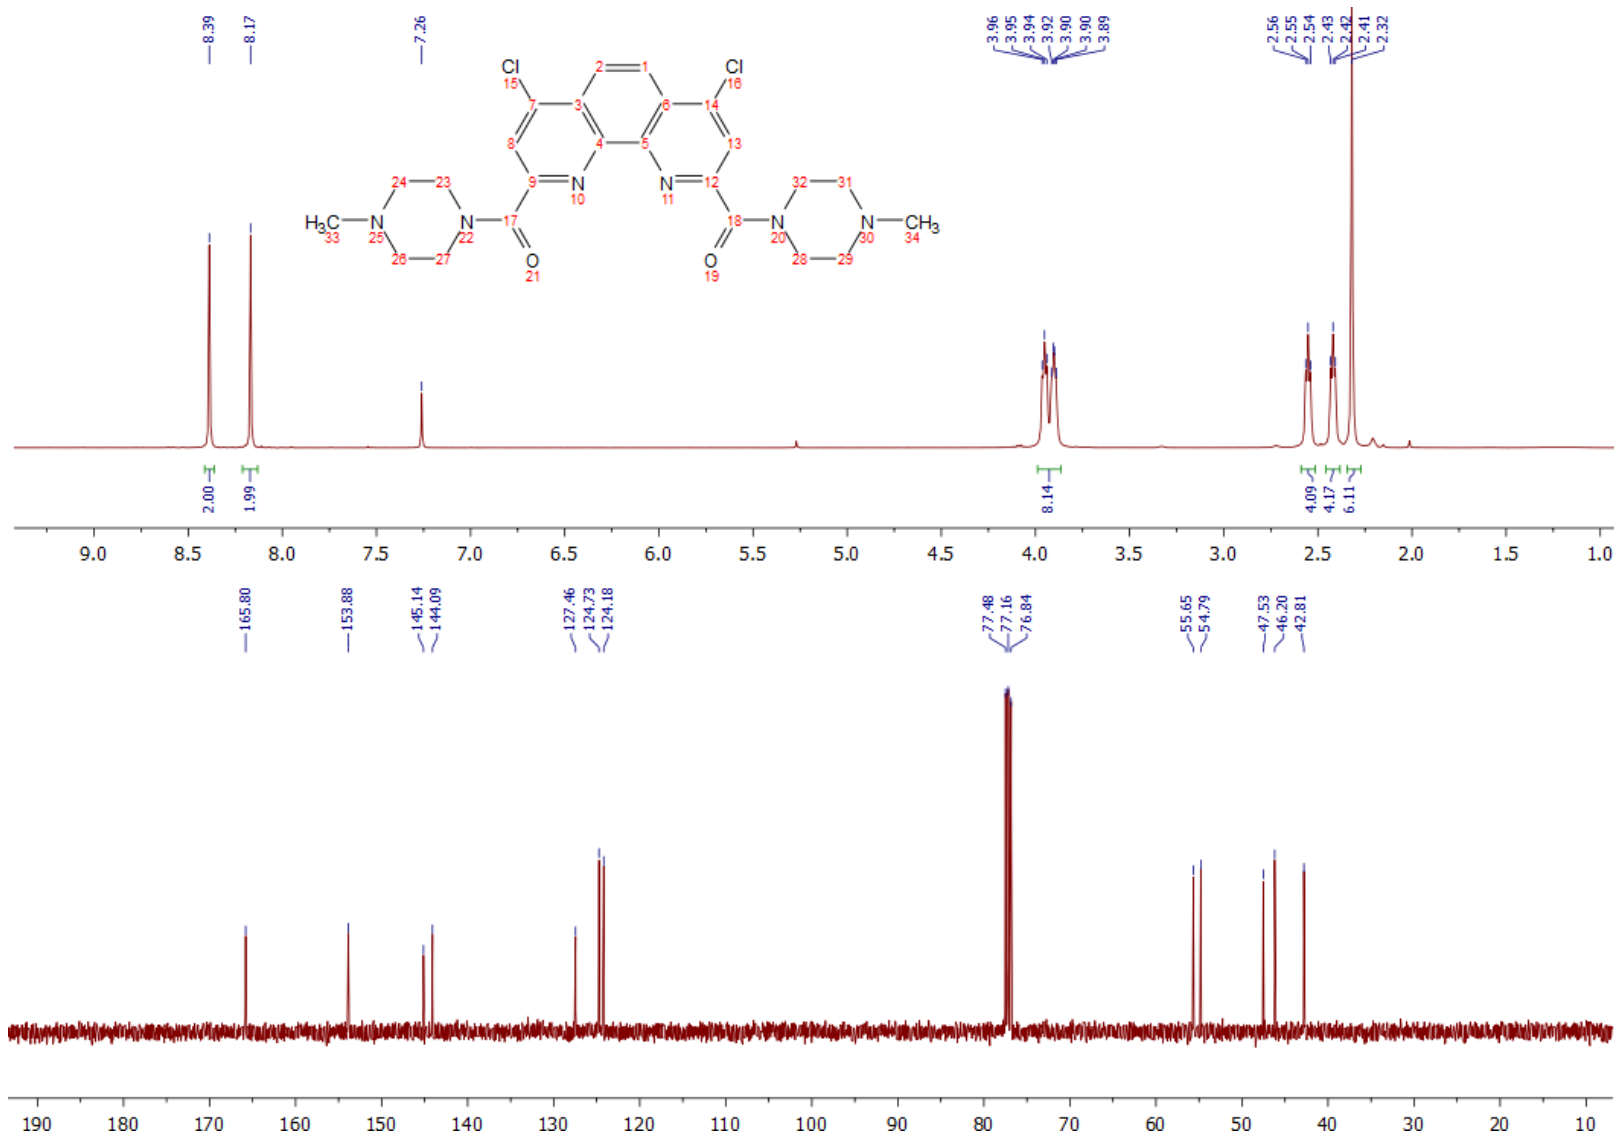

$^1\text{H}/^{13}\text{C}$  HSQC NMR in  $\text{CDCl}_3$  at  $25^\circ\text{C}$

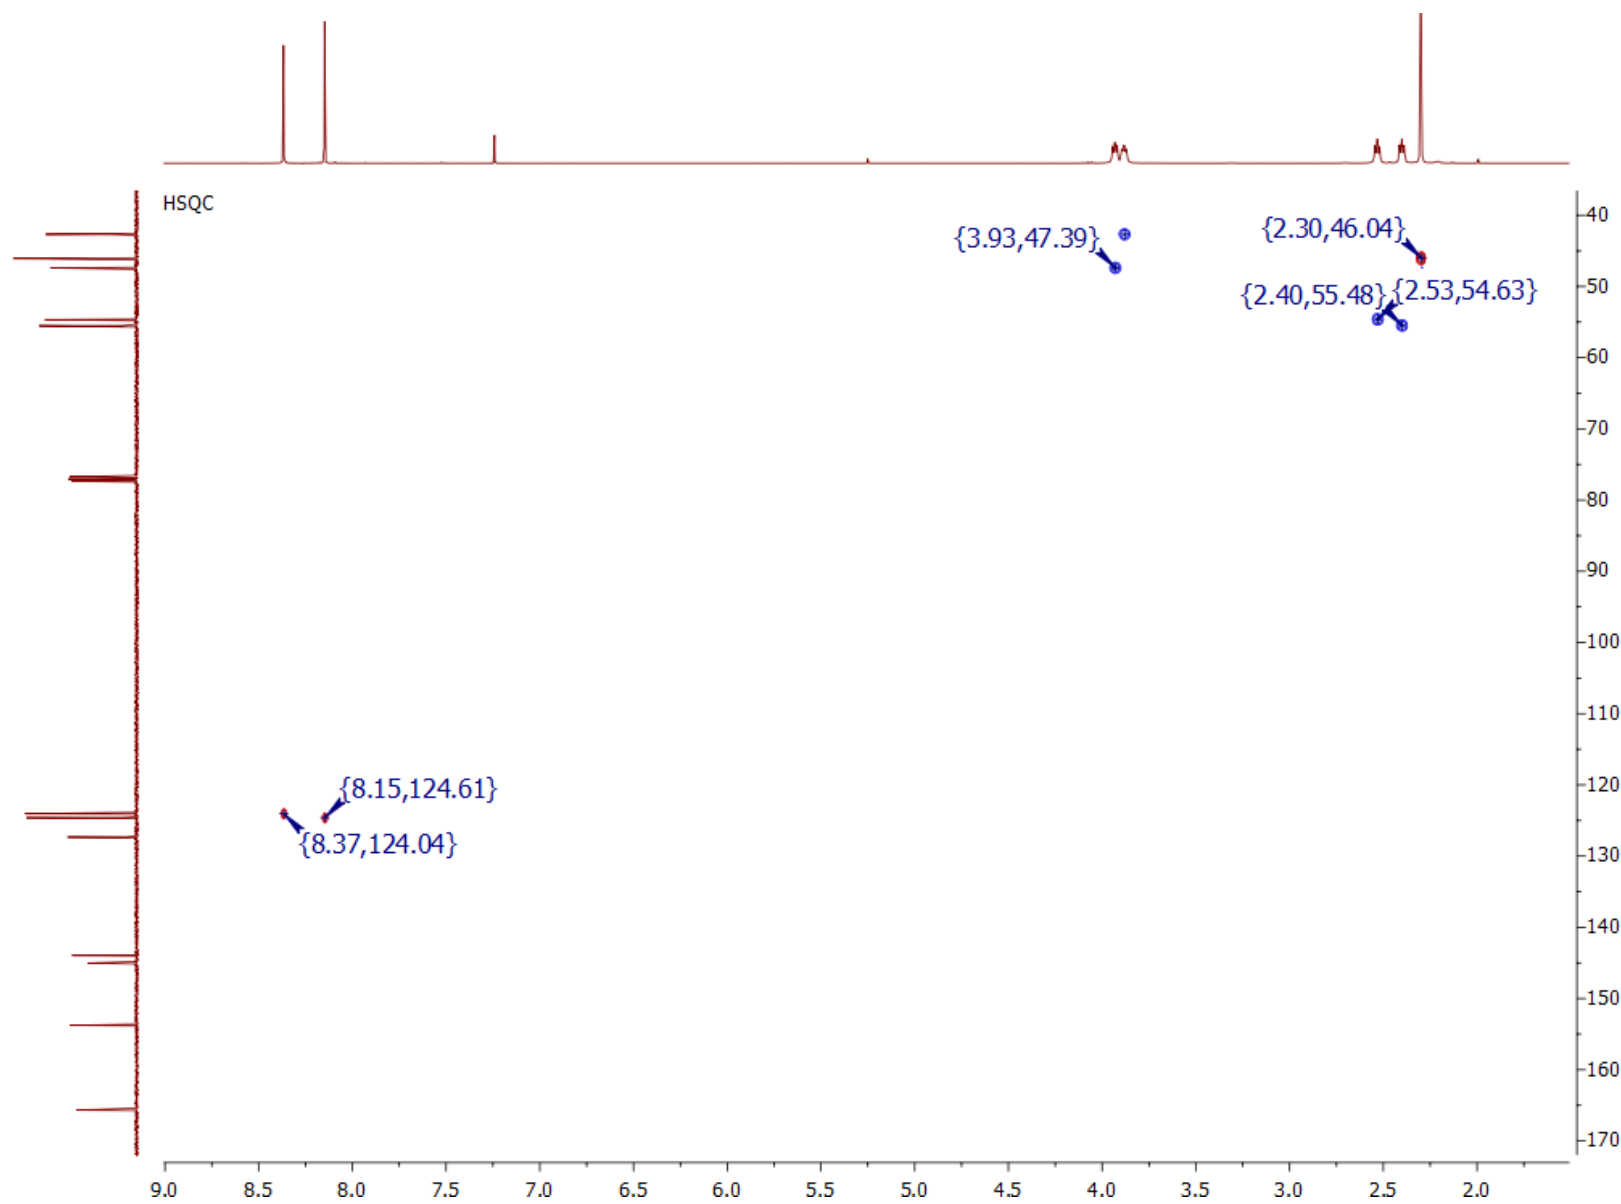

$^1\text{H}/^{13}\text{C}$  HMBC NMR in  $\text{CDCl}_3$  at  $25^\circ\text{C}$

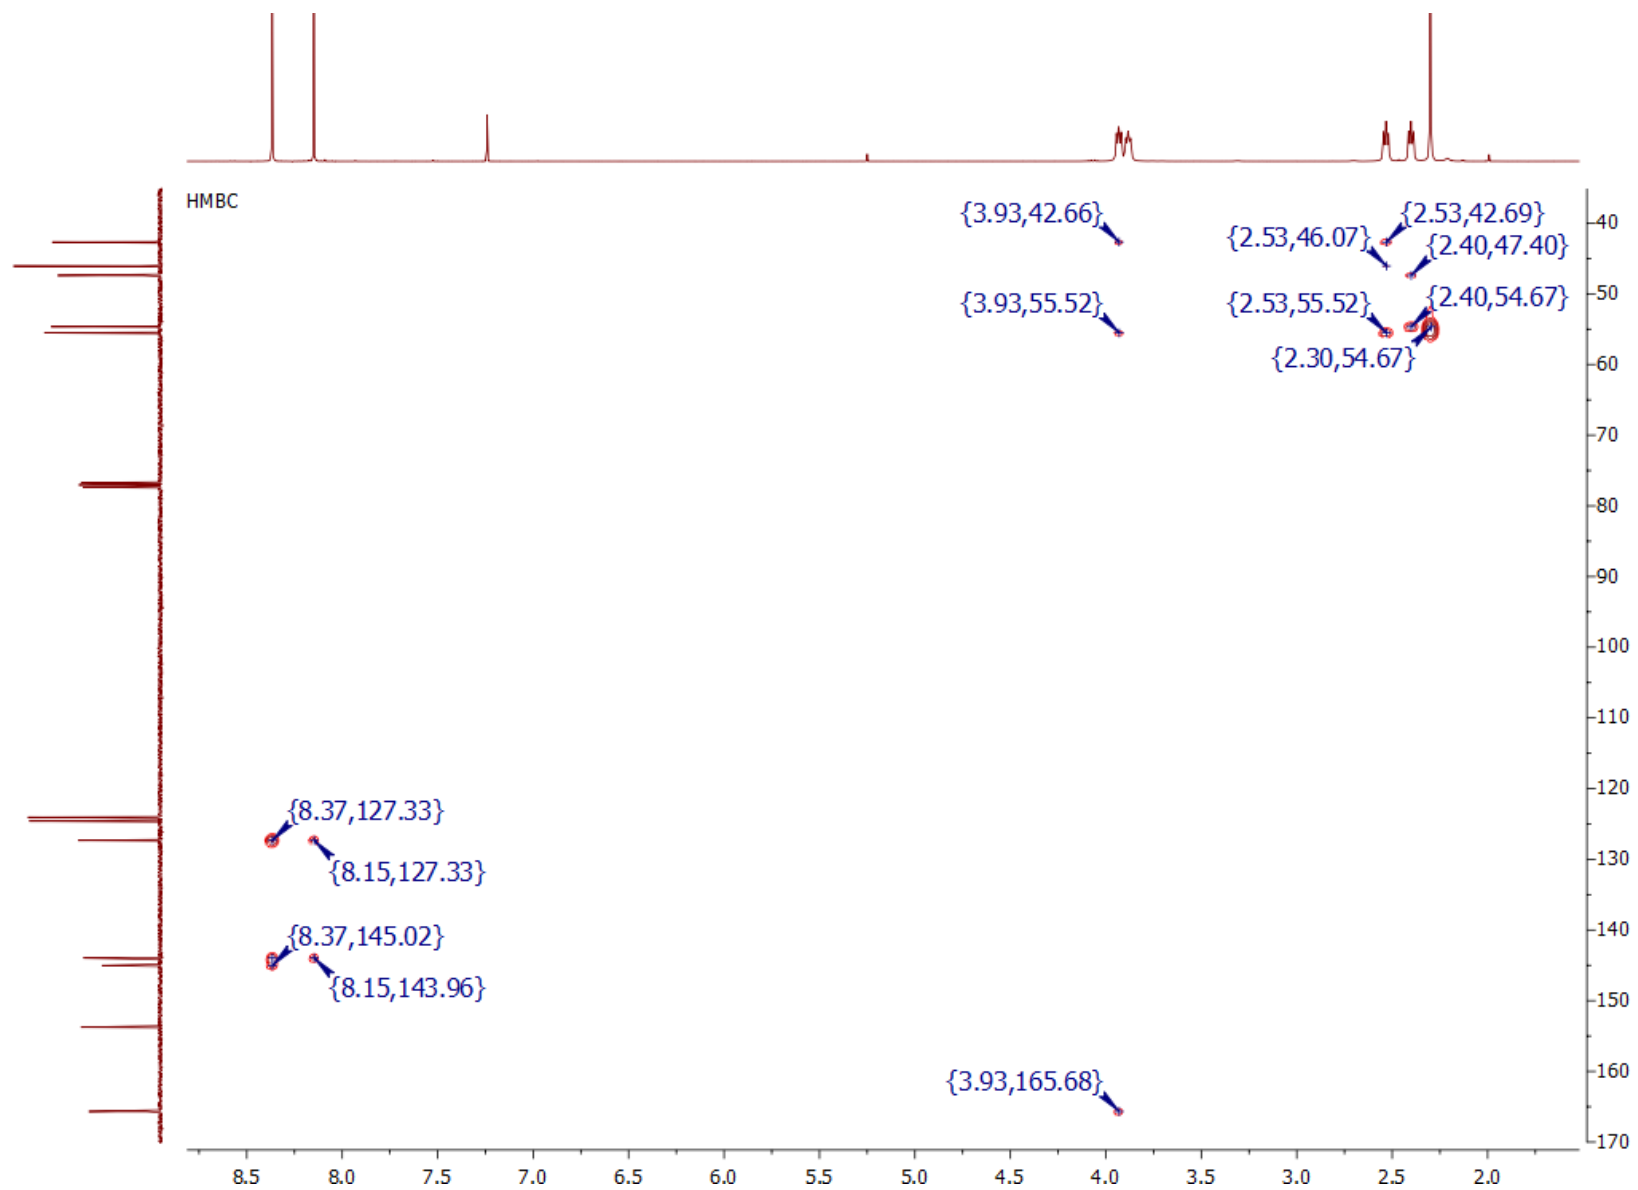

$^1\text{H}/^{13}\text{C}$  HMBC NMR in  $\text{CDCl}_3$  at  $25^\circ\text{C}$ , fragmental view (H-scale region from 4.1 to 2.1 ppm)

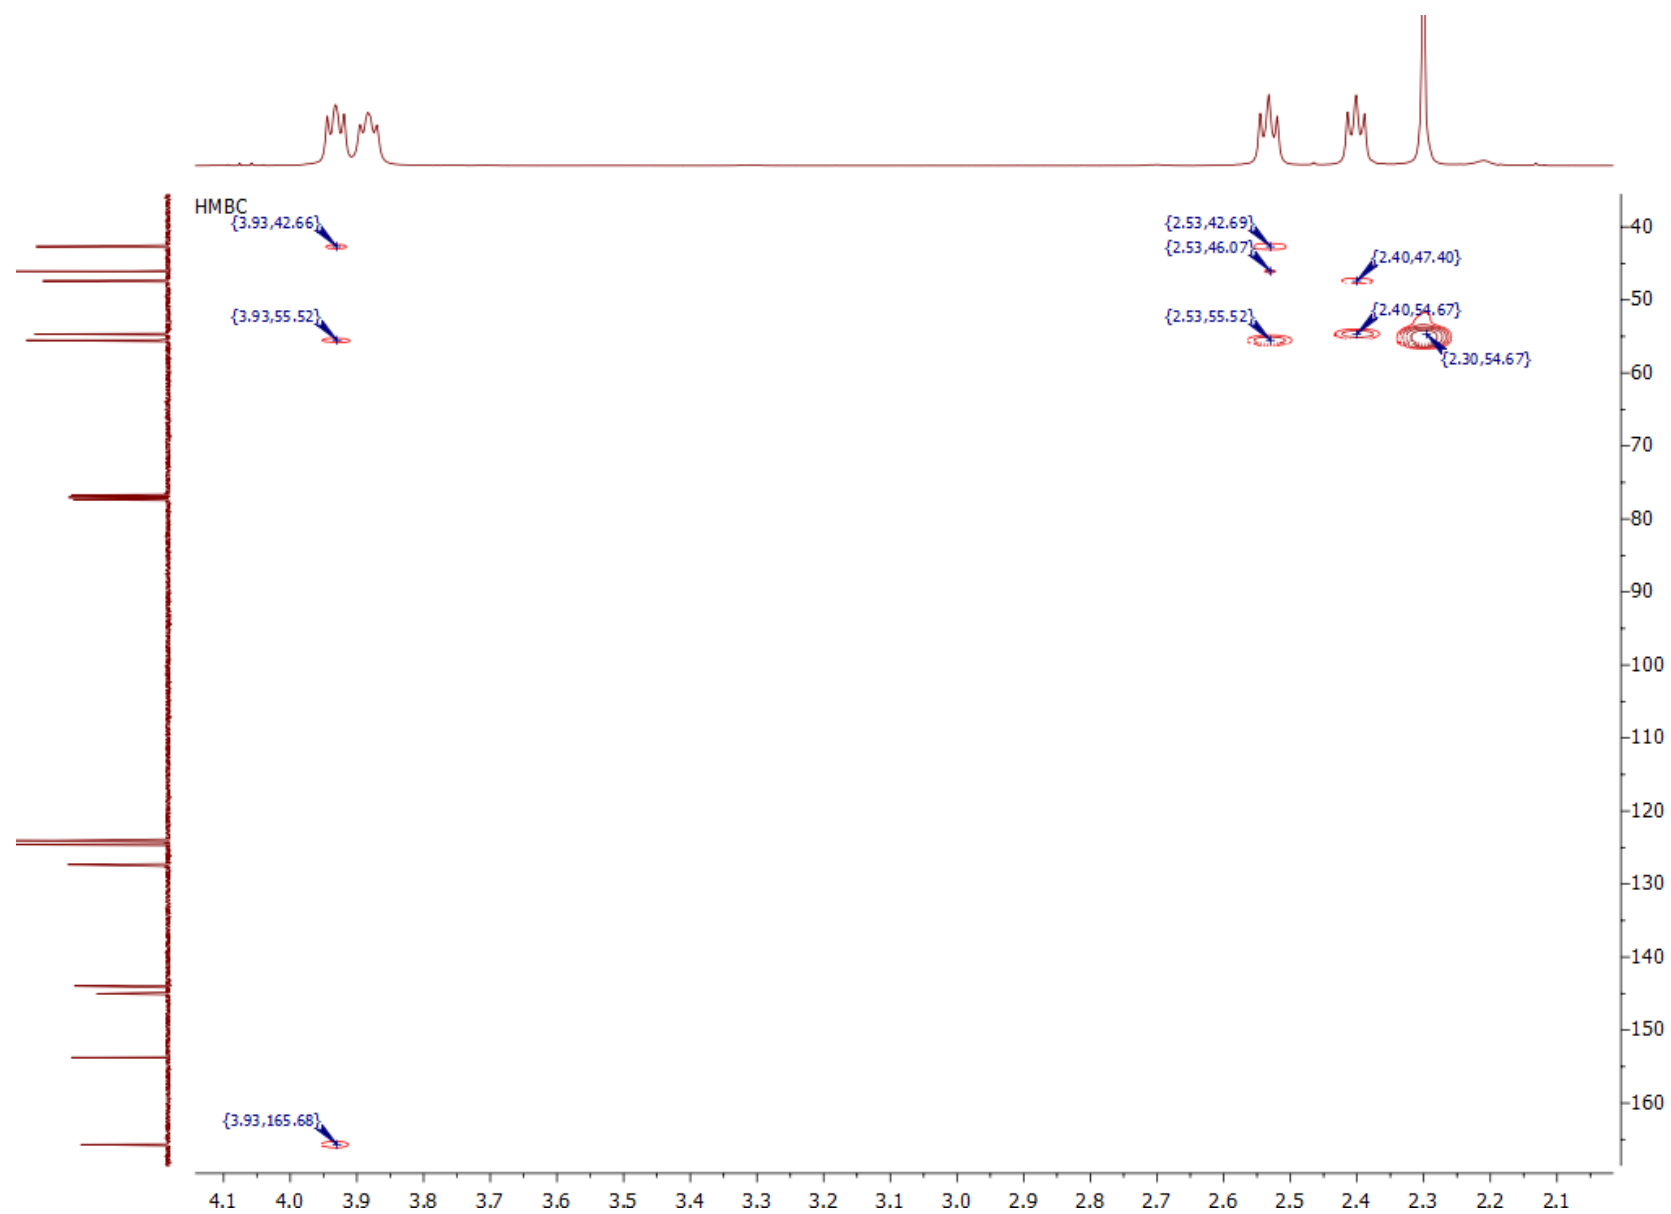

IR spectra at 25°C

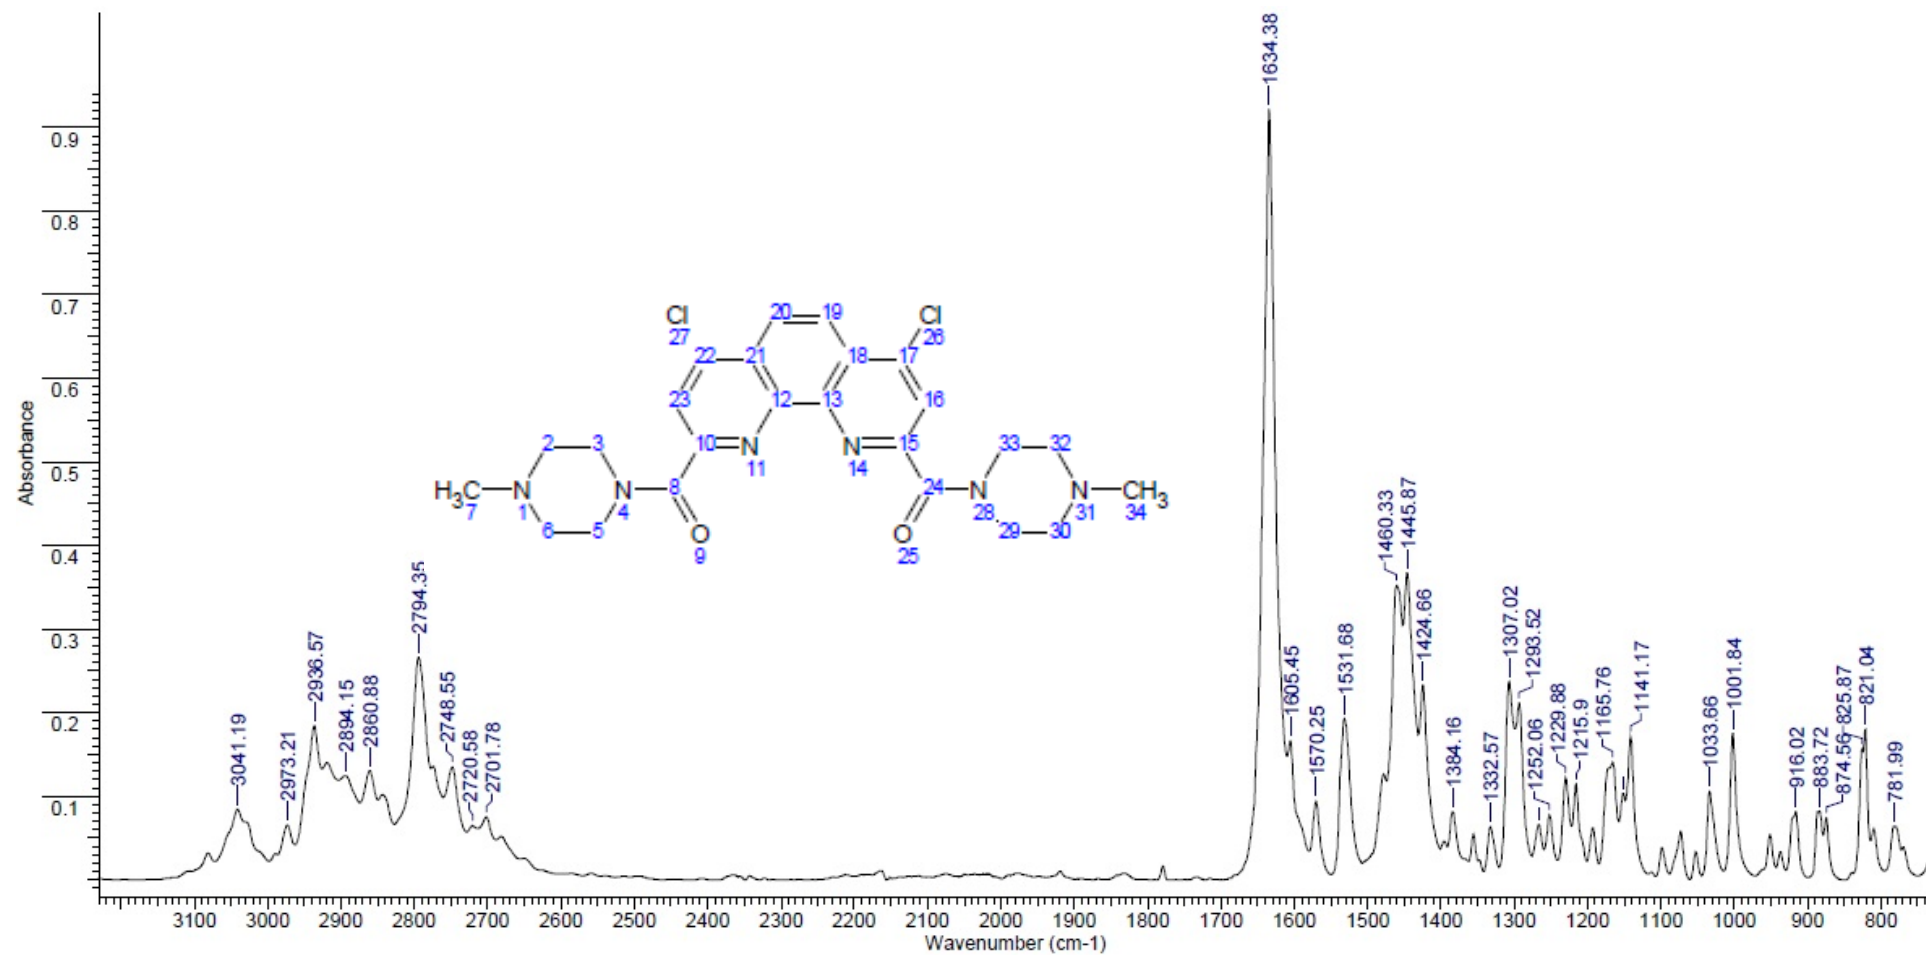

**(4,7-Dichloro-9-(2,3-dihydro-1*H*-indol-1-ylcarbonyl)-1,10-phenanthrolin-2-yl)(2,3-dihydro-1*H*-indol-1-yl)methanone 3f**

<sup>1</sup>H NMR (above) and <sup>13</sup>C NMR (below) spectra in CDCl<sub>3</sub> at 25°C

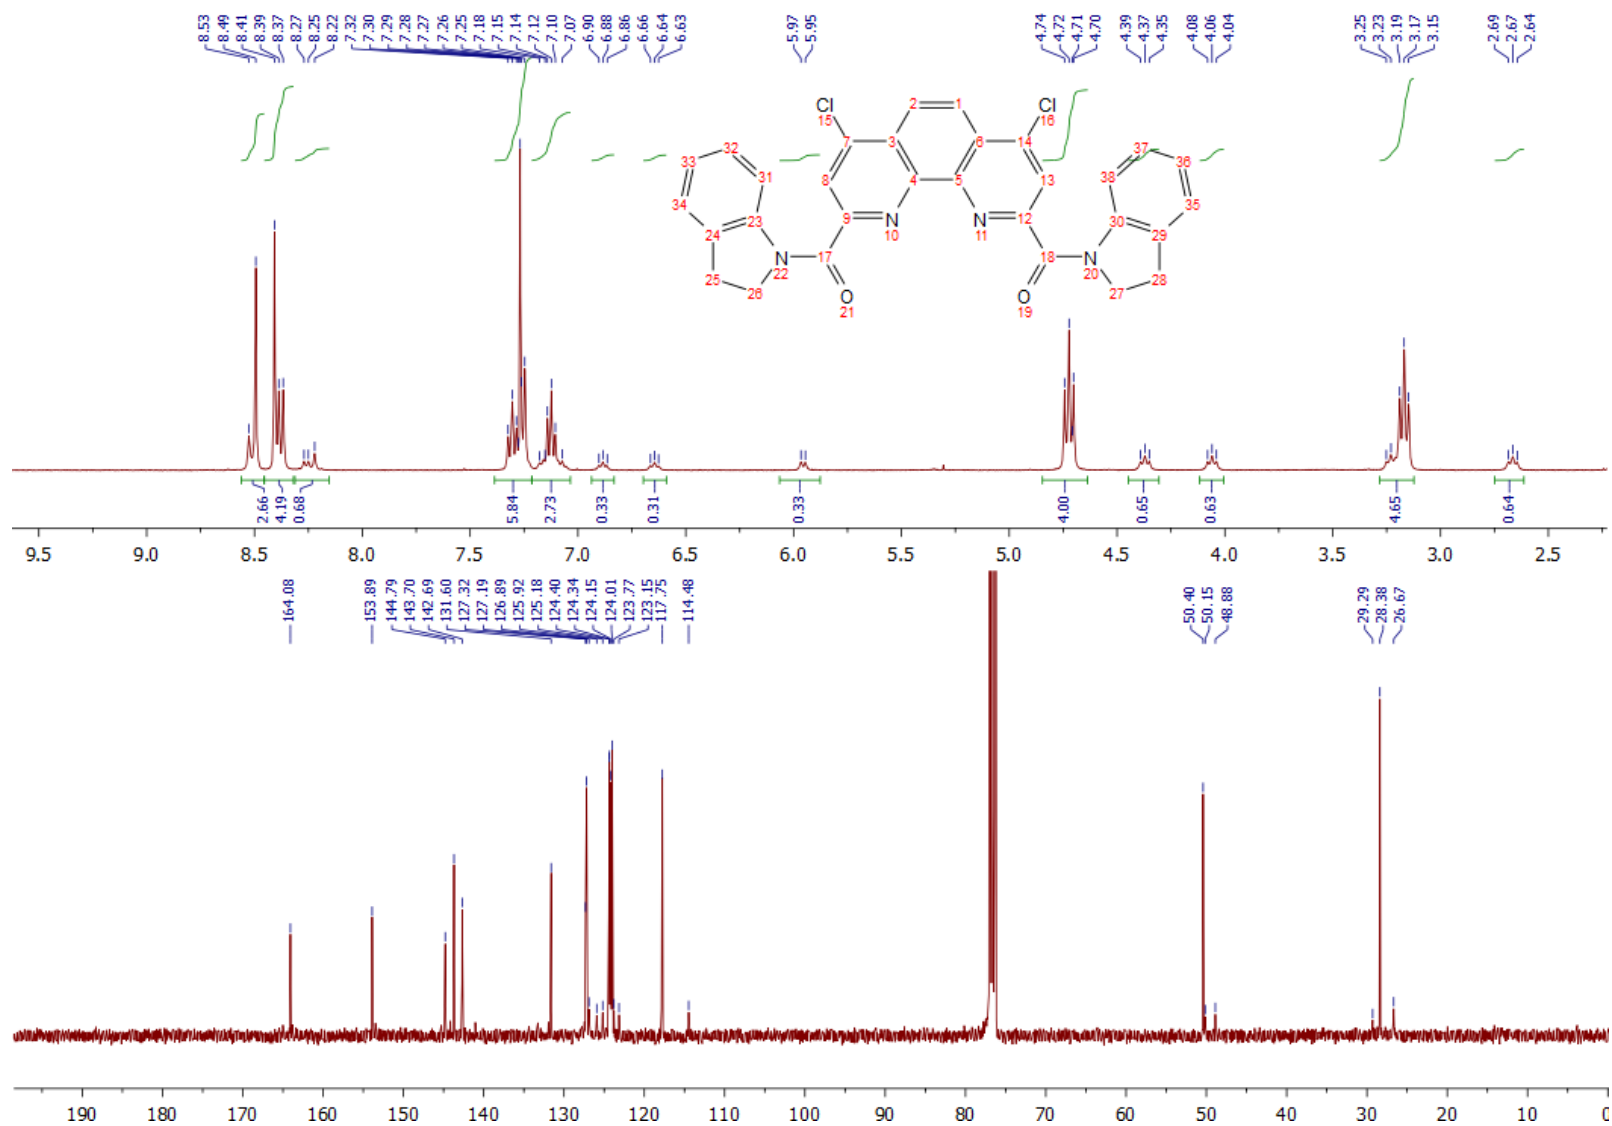

$^{13}\text{C}$  NMR spectra in  $\text{CDCl}_3$  at  $25^\circ\text{C}$ , fragmental view ( $^{13}\text{C}$ -scale,  $\delta$  from 114 to 133 ppm)

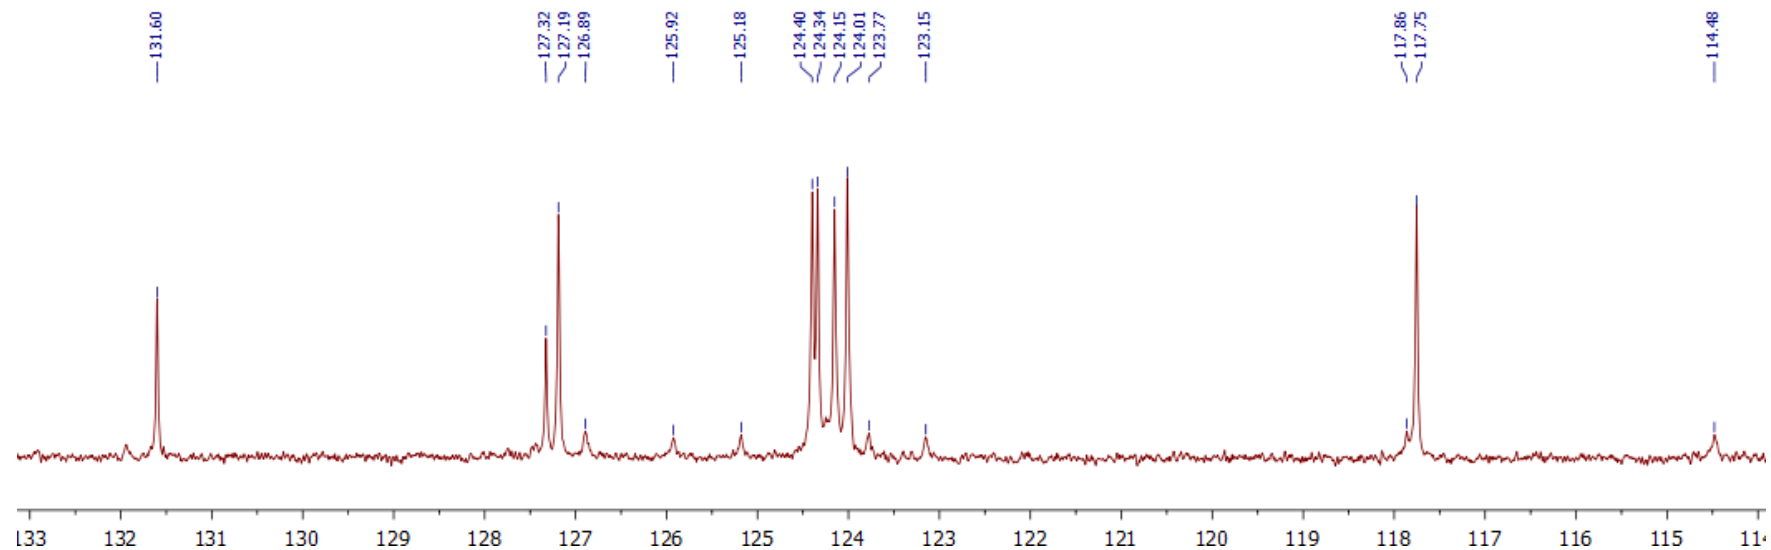

$^{13}\text{C}$  NMR spectra in  $\text{CDCl}_3$  at  $25^\circ\text{C}$ , fragmental view ( $^{13}\text{C}$ -scale,  $\delta$  from 26 to 52 ppm)

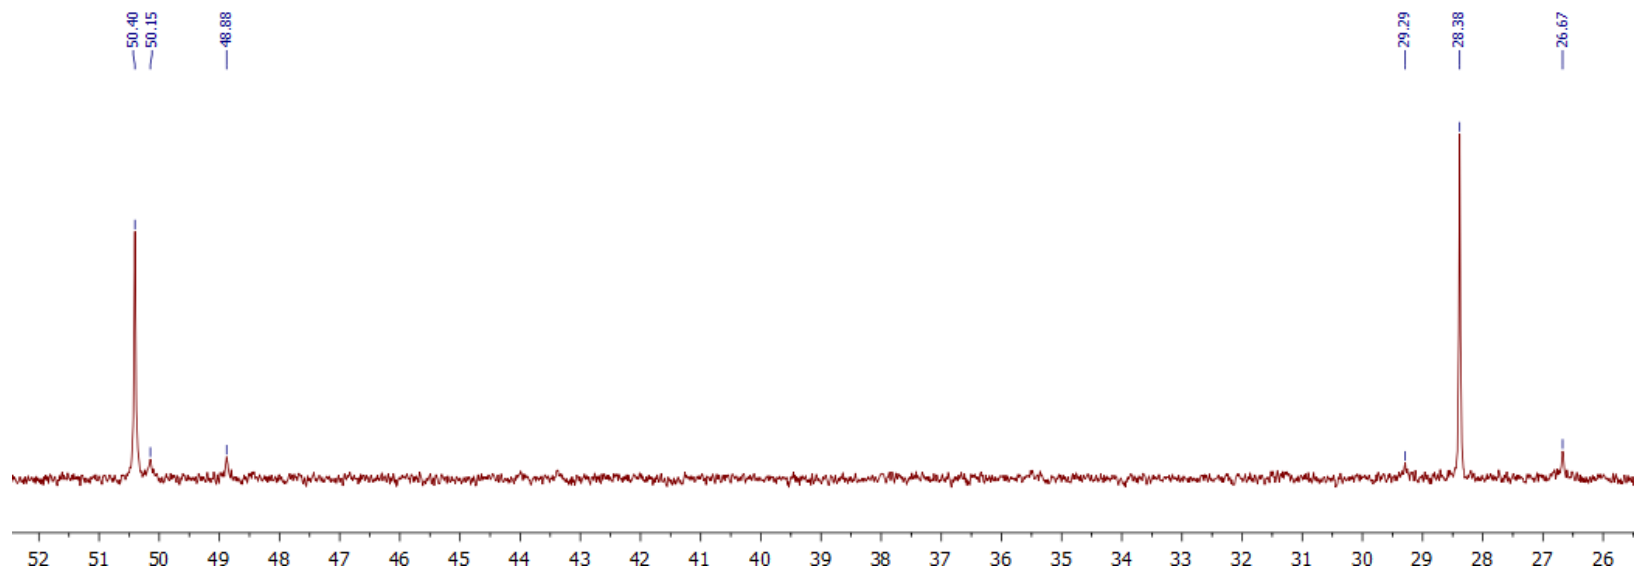



$^1\text{H}$  NMR spectra in  $\text{CDCl}_3$  at  $-30^\circ\text{C}$ ,  $0^\circ\text{C}$ ,  $25^\circ\text{C}$  and  $55^\circ\text{C}$  (from top to bottom)

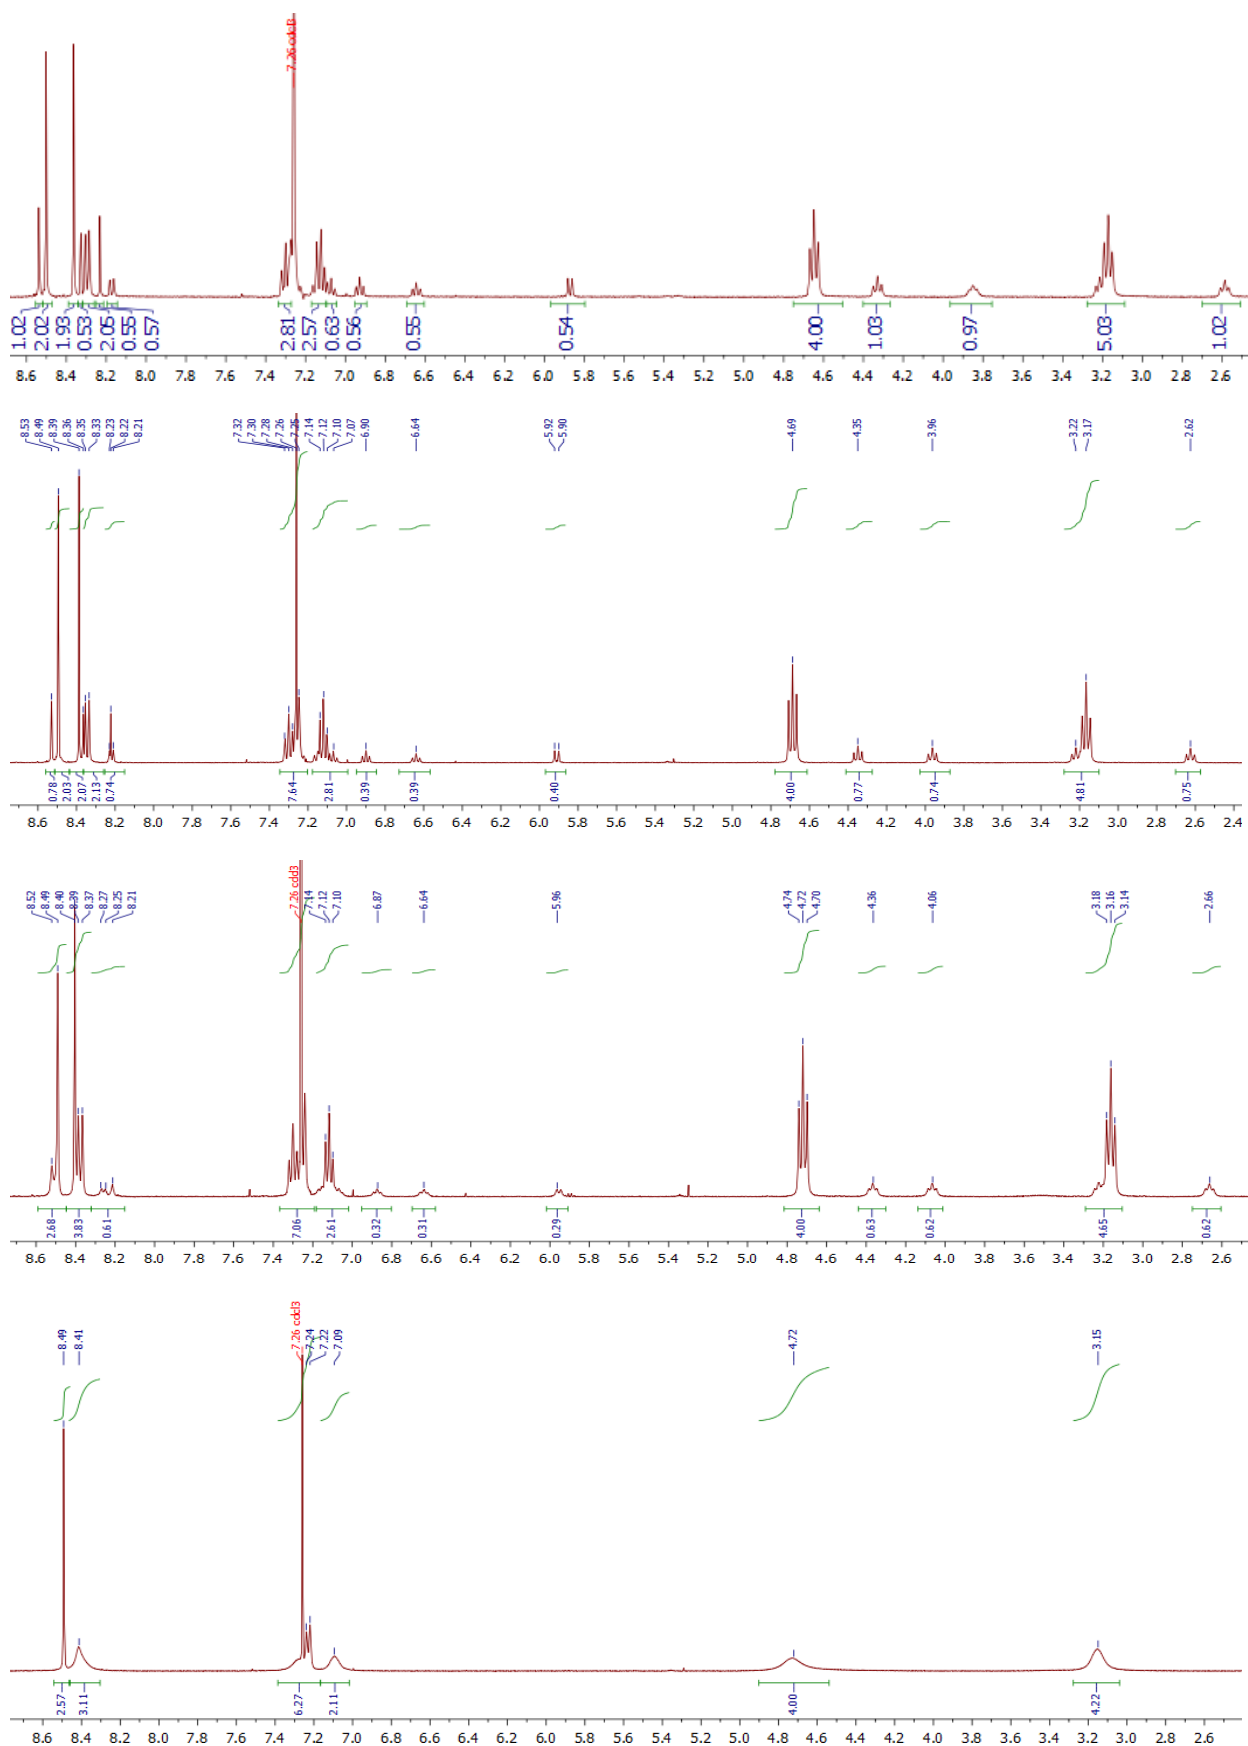

$^1\text{H}$  NMR spectra in  $\text{DMSO-d}_6$  at  $25^\circ\text{C}$  (above) and  $55^\circ\text{C}$  (below)

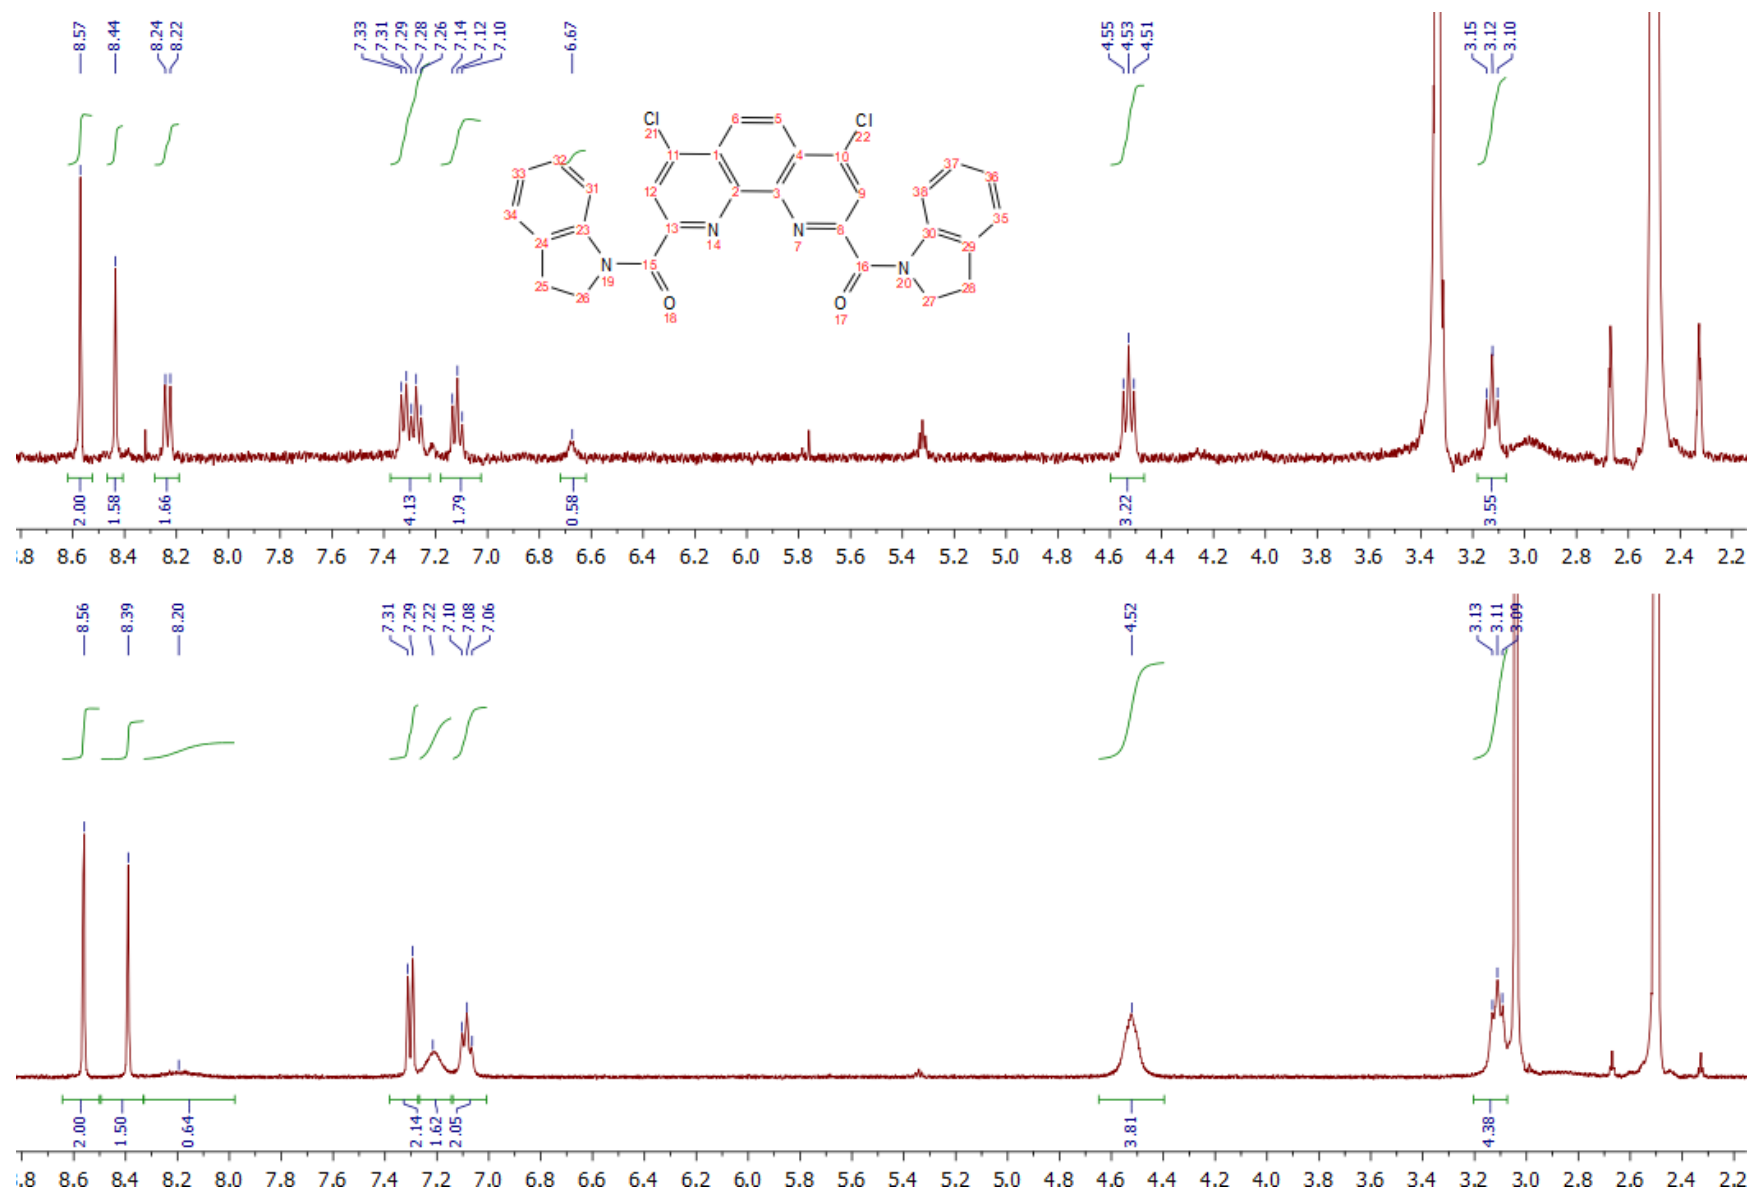

$^1\text{H}$  NMR spectra in toluene- $d_8$  at  $55^\circ\text{C}$

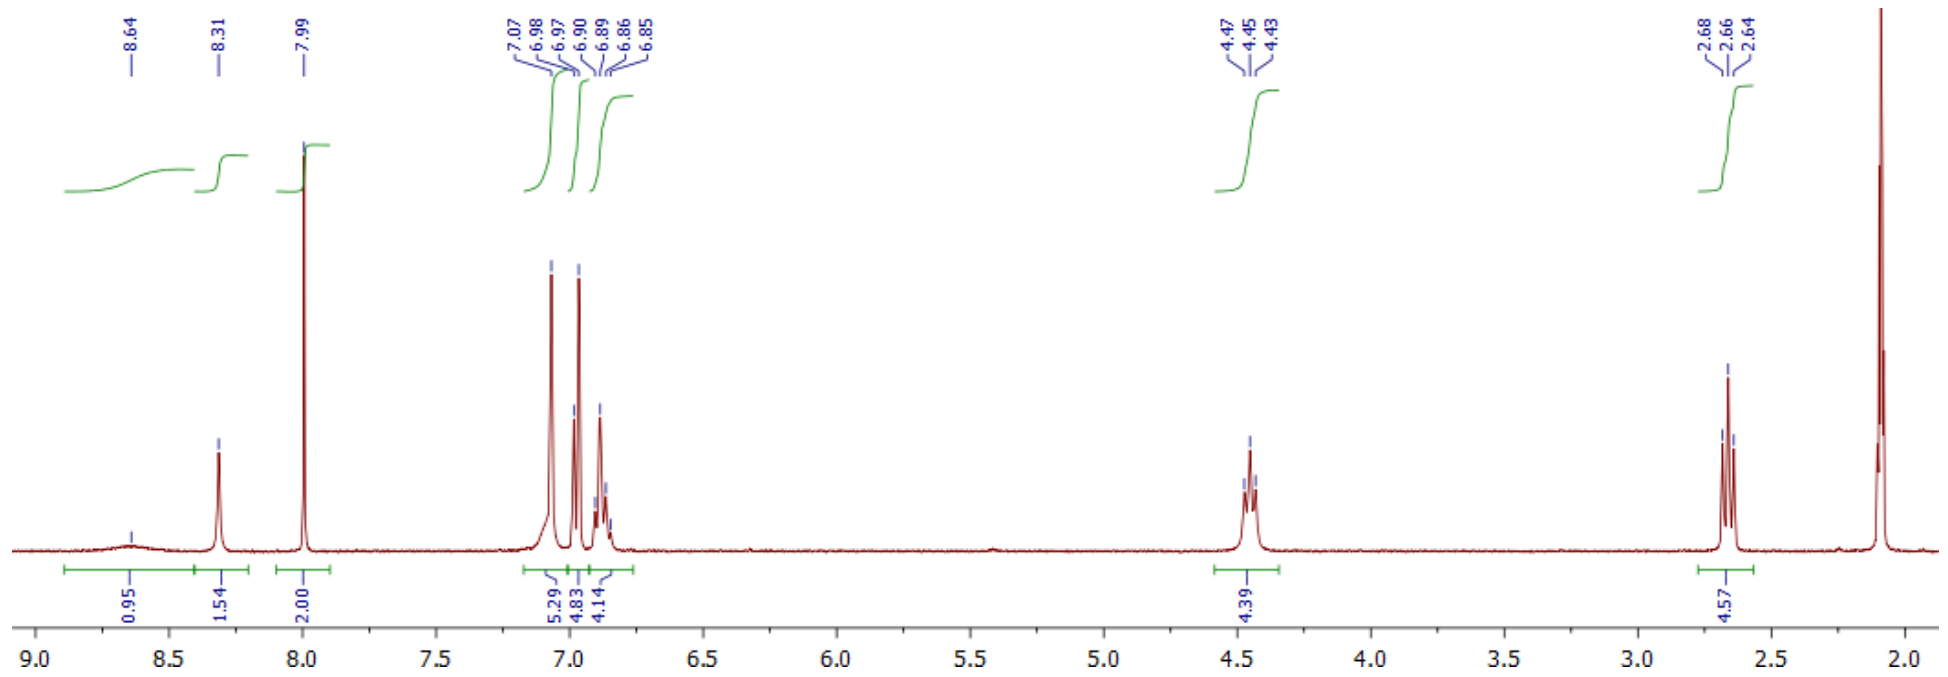

COSY  $^1\text{H}/^1\text{H}$  NMR spectra in  $\text{CDCl}_3$  at  $-30^\circ\text{C}$  (general view)

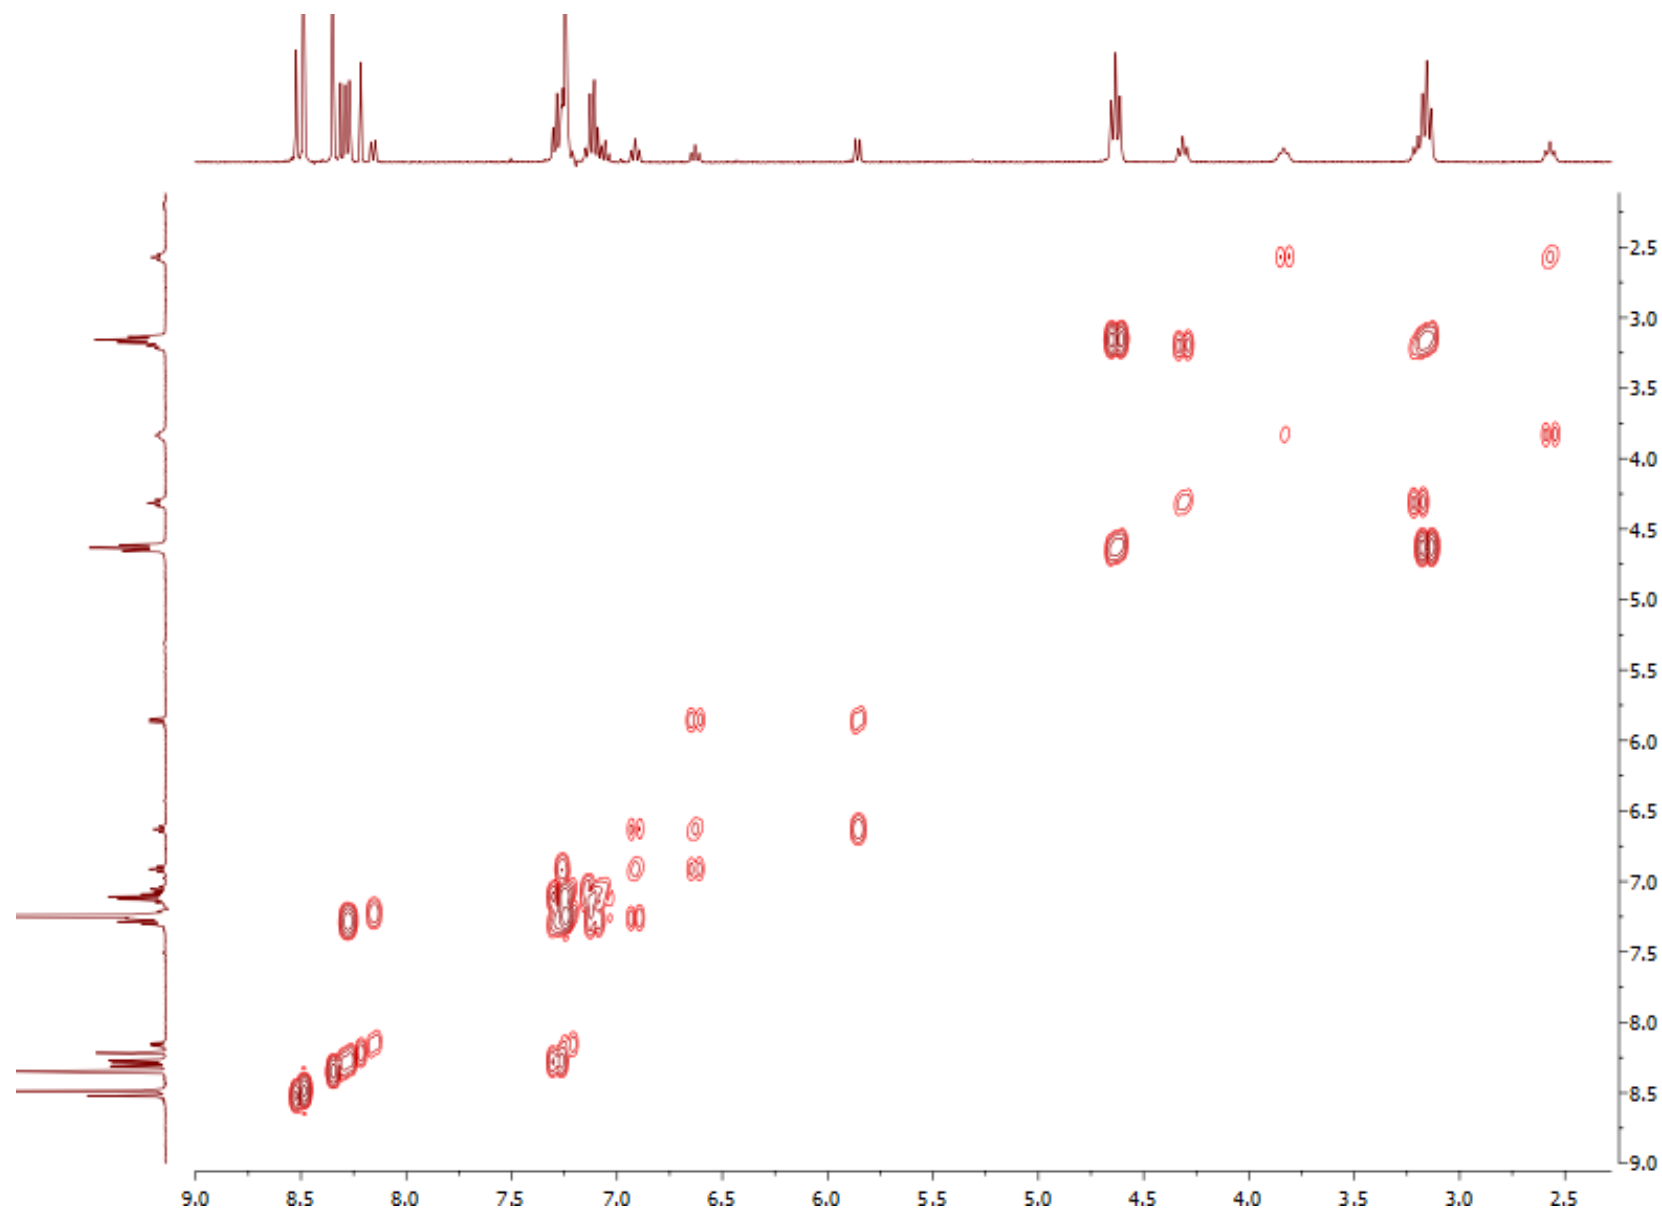

COSY  $^1\text{H}/^1\text{H}$  NMR spectra in  $\text{CDCl}_3$  at  $-30^\circ\text{C}$  (fragmental view)

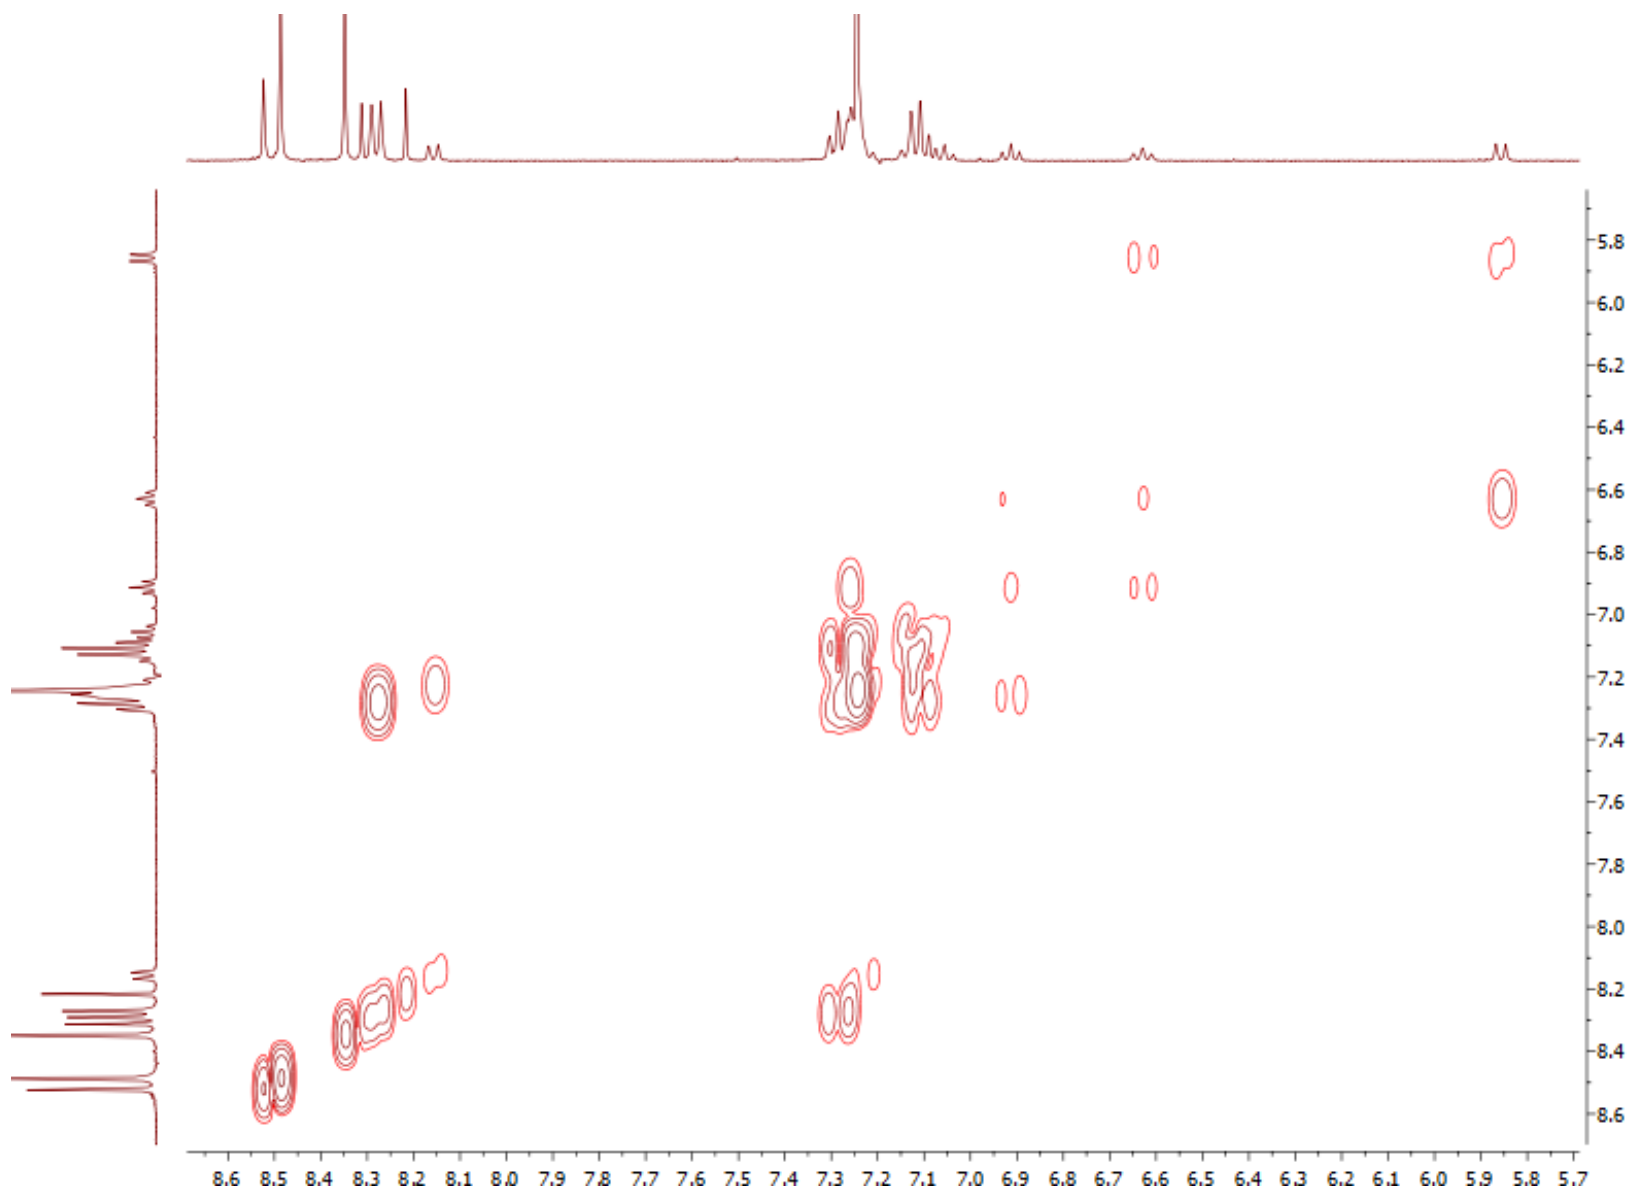

ROESY  $^1\text{H}/^1\text{H}$  NMR spectra in  $\text{CDCl}_3$  at  $-30^\circ\text{C}$  (left) and  $25^\circ\text{C}$  (right)

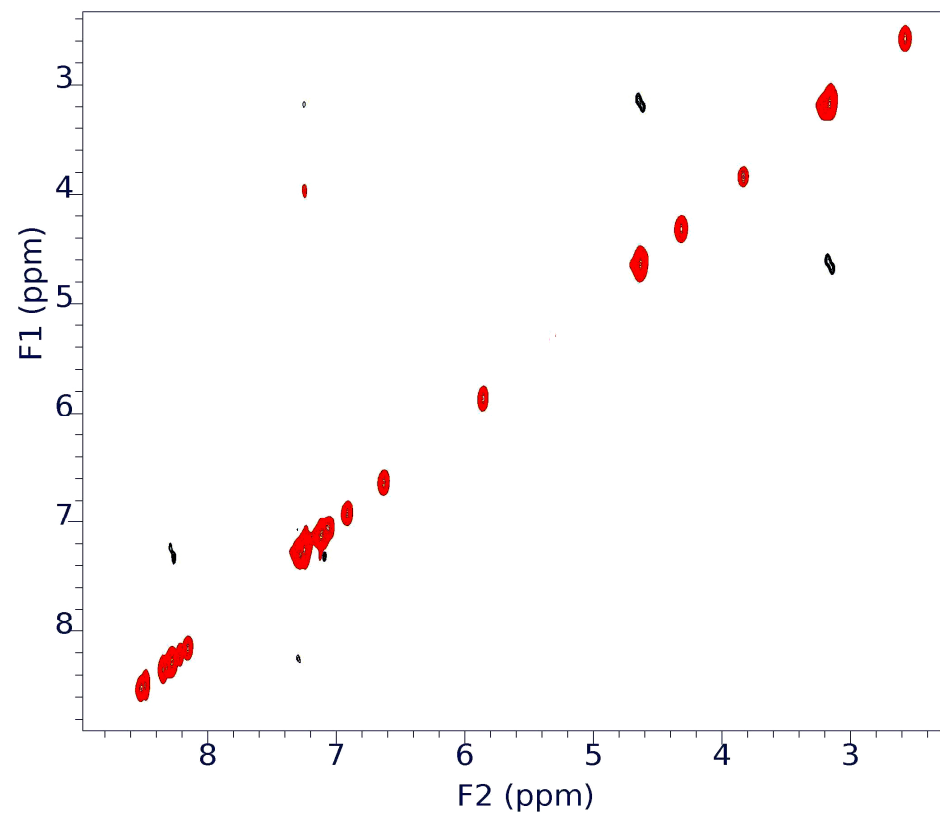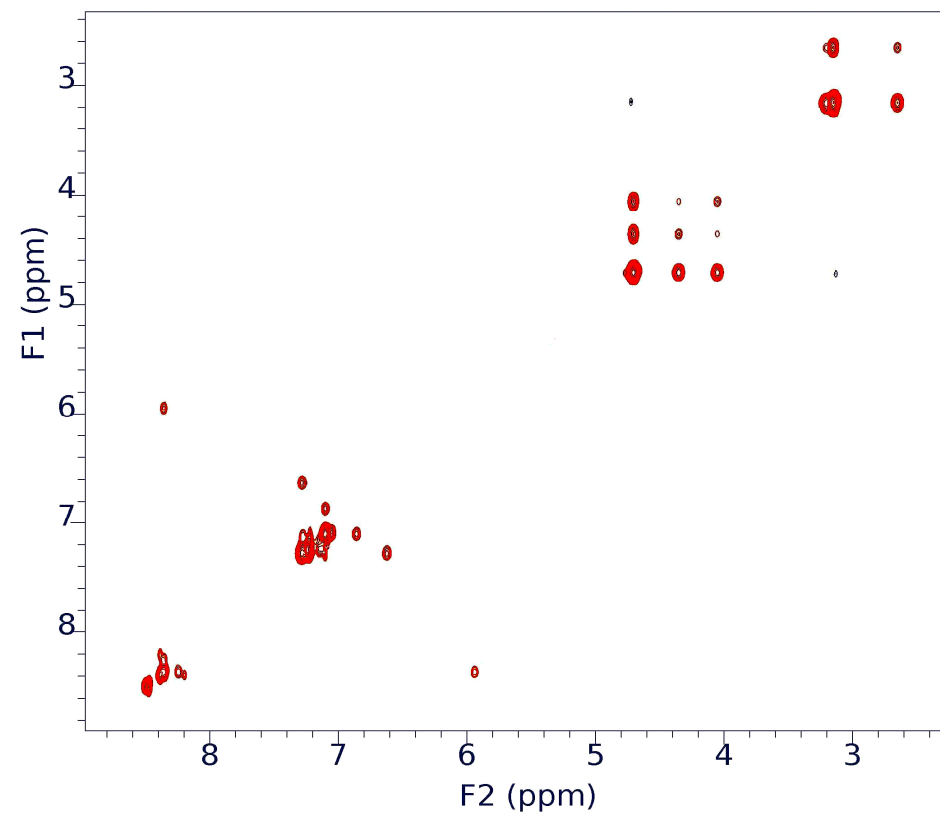

IR spectra at 25 °C

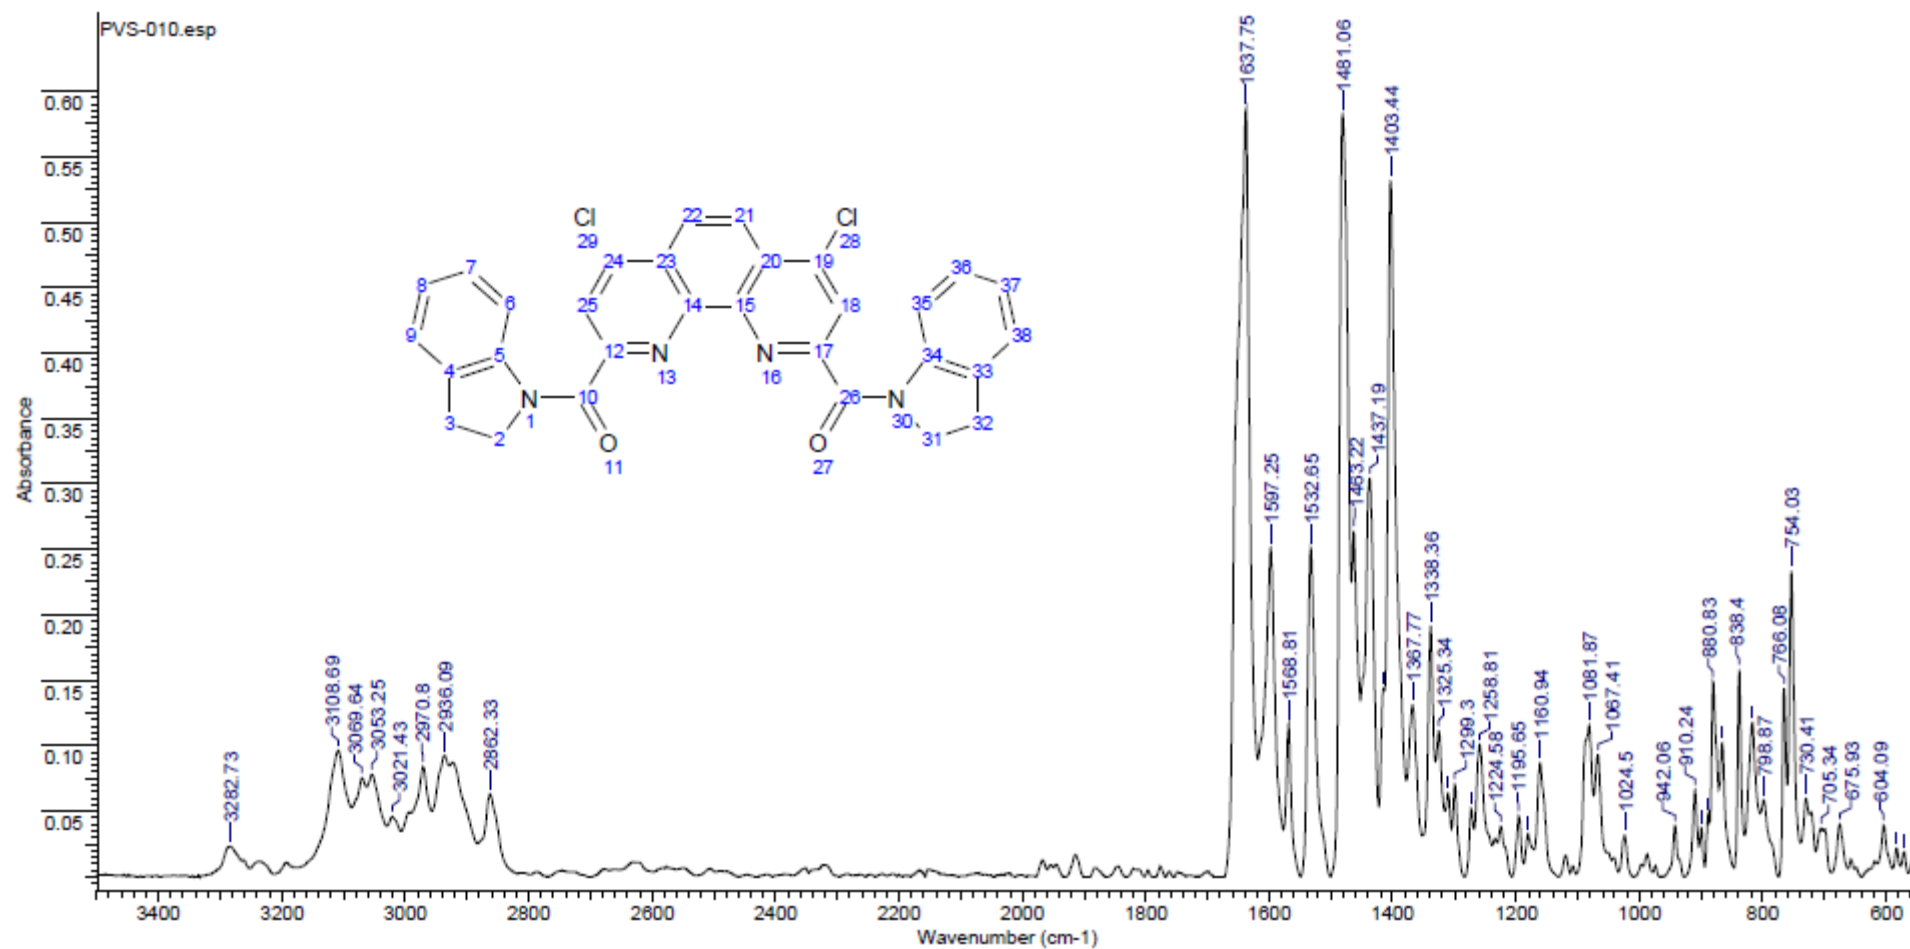

HRMS spectra

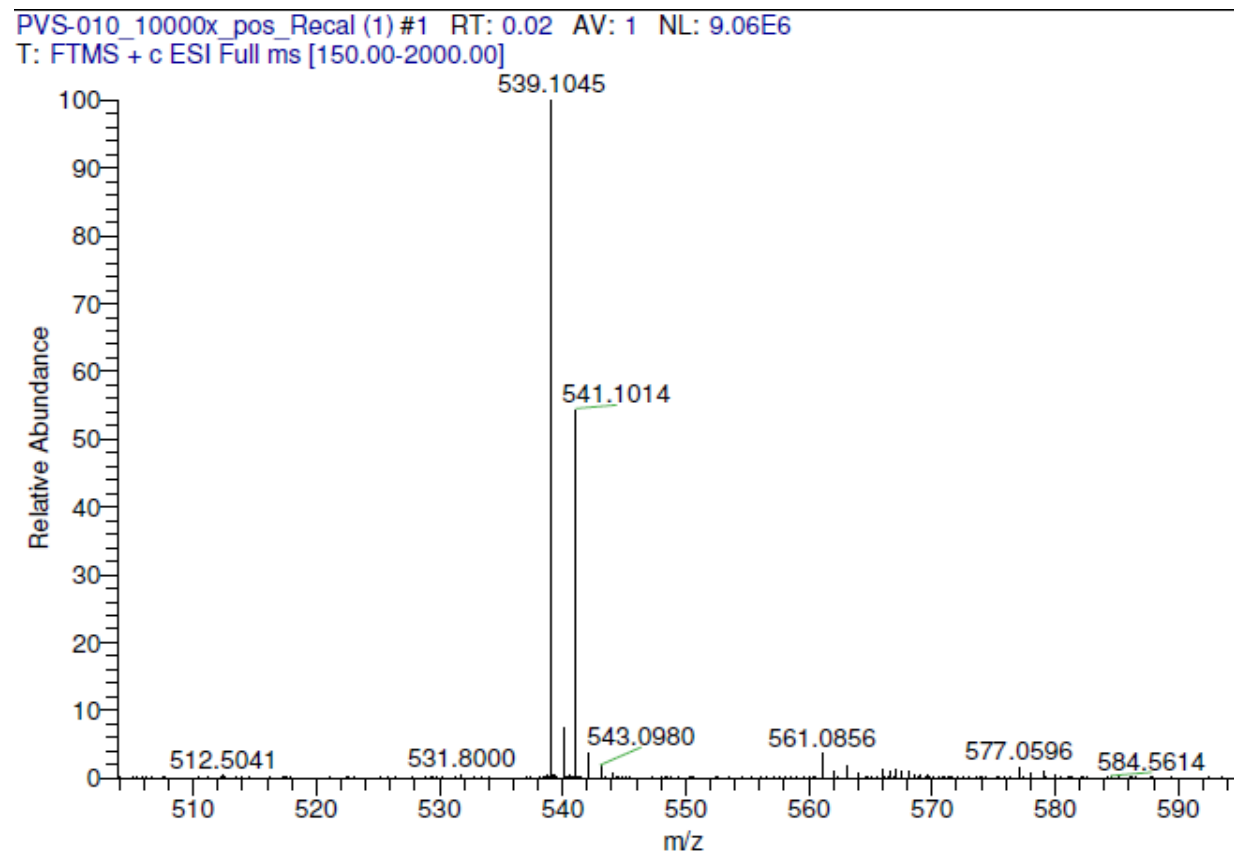



4(4,7-Dichloro-9-(1,2,3,4-tetrahydroquinolin-1-ylcarbonyl)-1,10-phenanthrolin-2-yl)(1,2,3,4-tetrahydroquinolin-1-yl)methanone 3g

<sup>1</sup>H NMR (above) and <sup>13</sup>C NMR (below) spectra in CDCl<sub>3</sub> at 25 °C

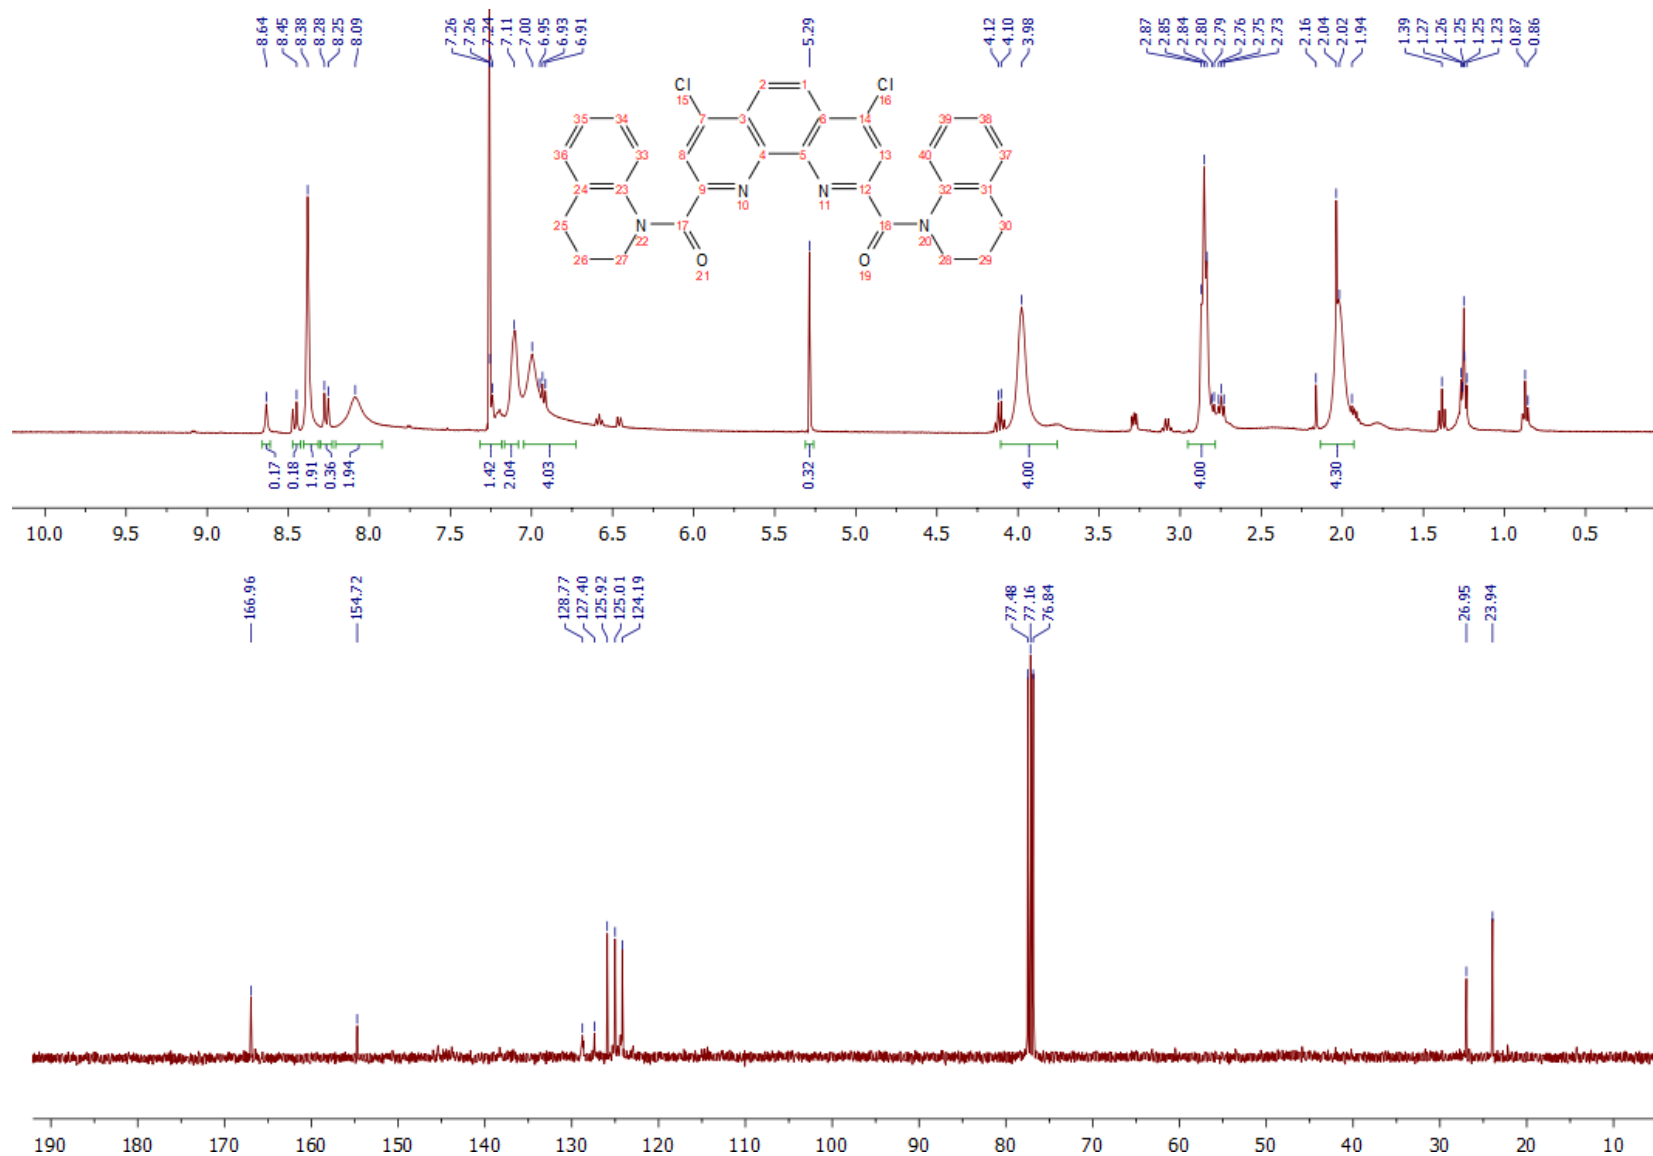

$^1\text{H}$  NMR (above) and  $^{13}\text{C}$  NMR (below) spectra in  $\text{C}_6\text{D}_6$  at  $55^\circ\text{C}$

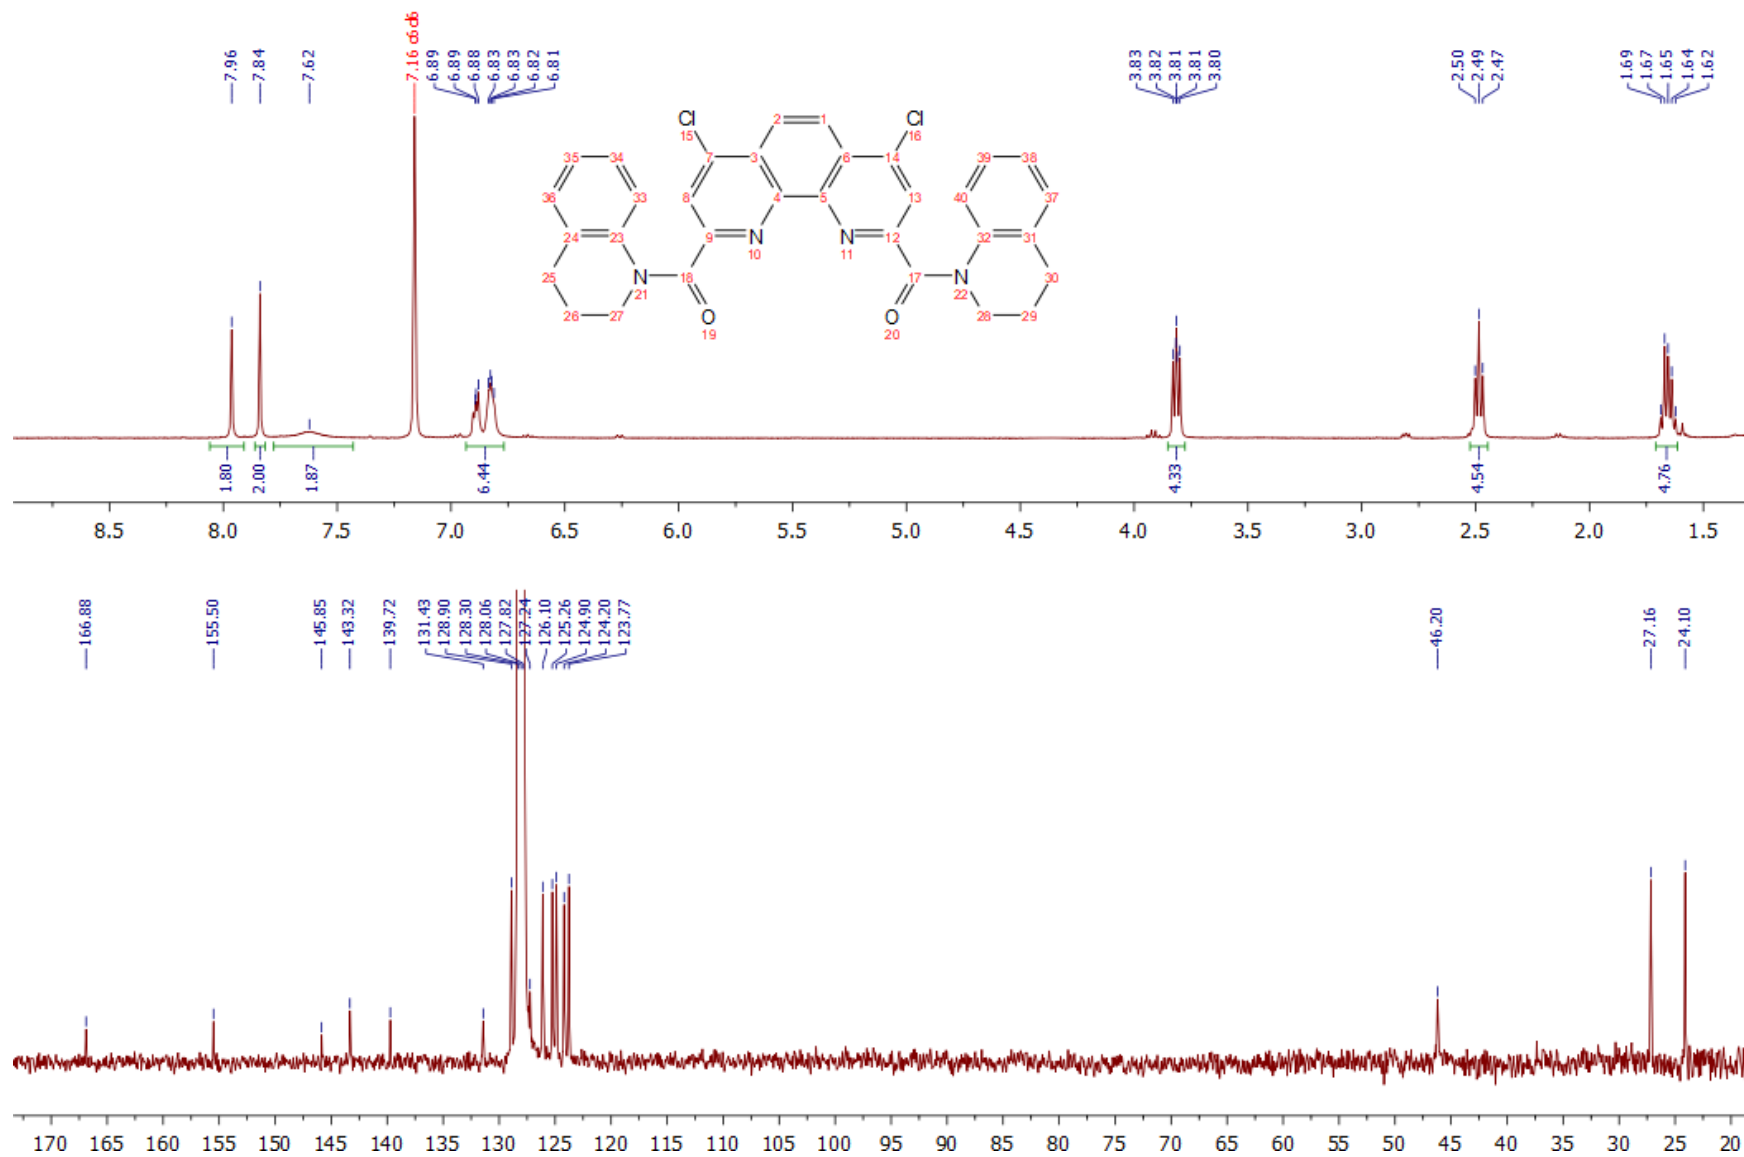

$^1\text{H}/^{13}\text{C}$  ASAPHMQC NMR spectra in  $\text{C}_6\text{D}_6$  at  $55^\circ\text{C}$

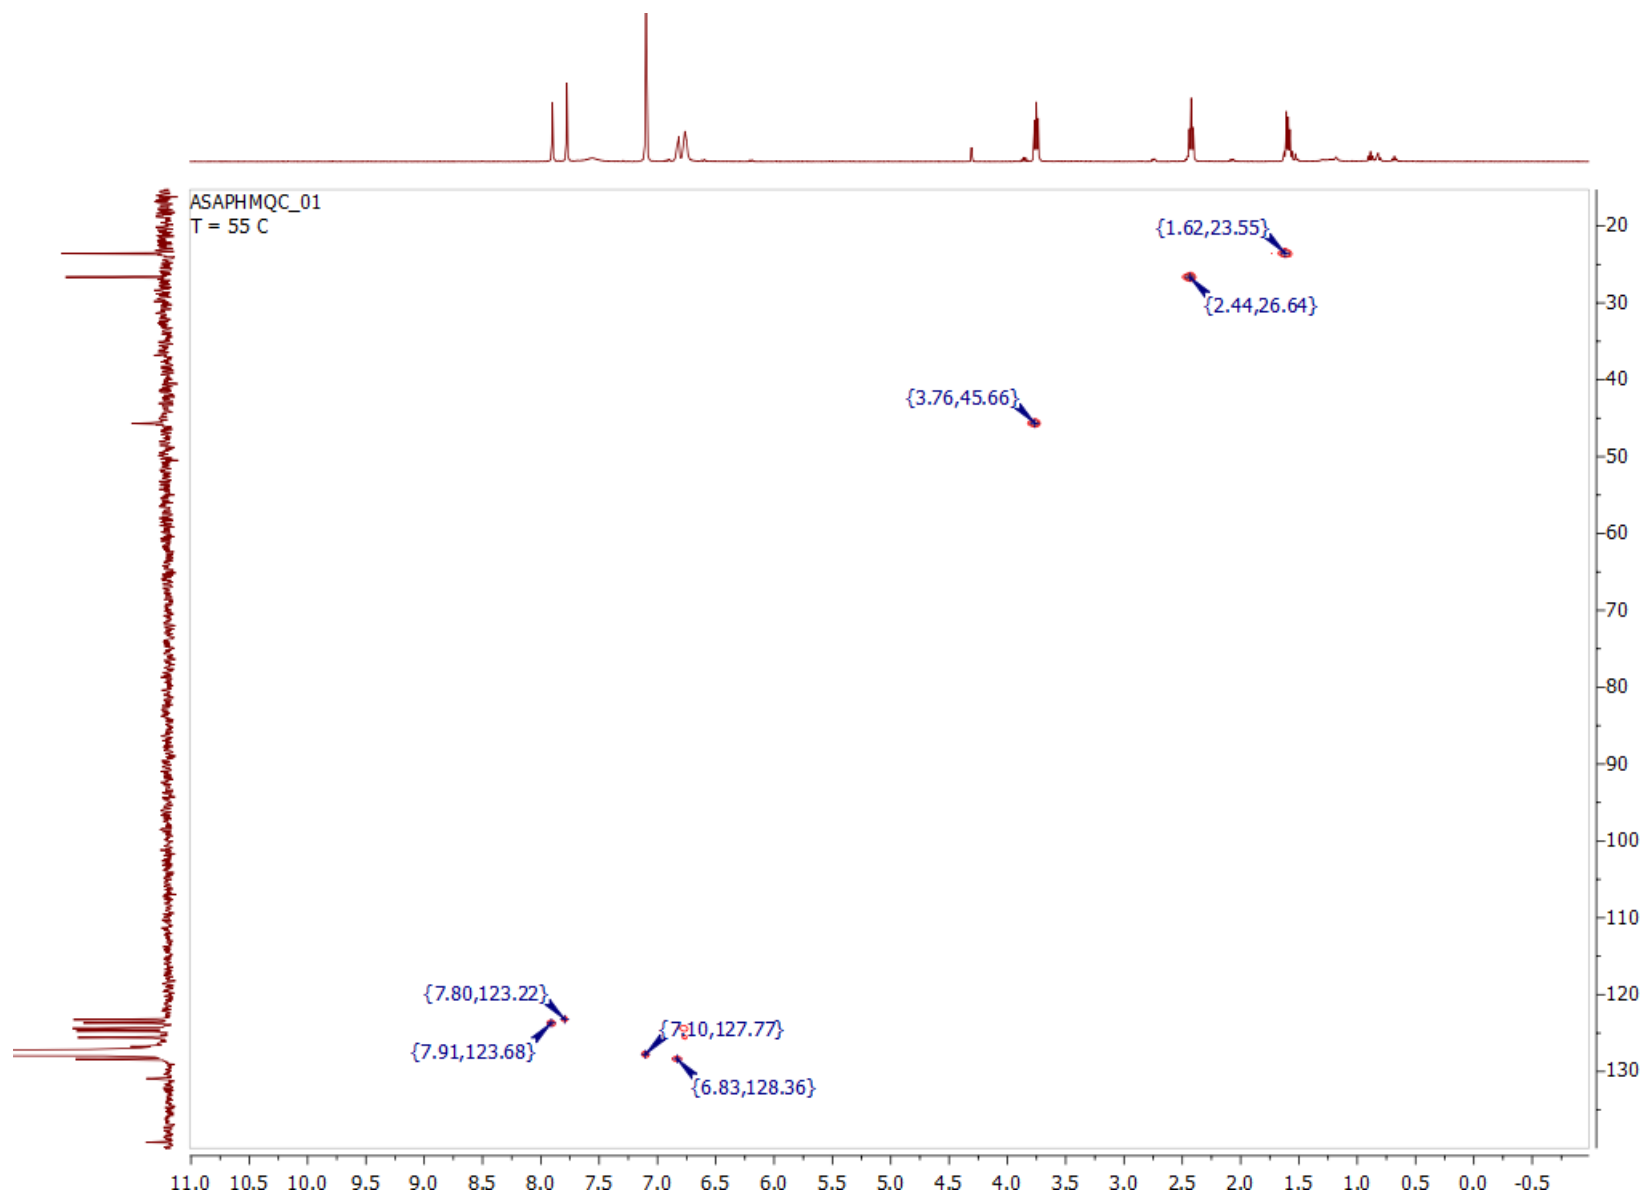

IR spectra at 25°C

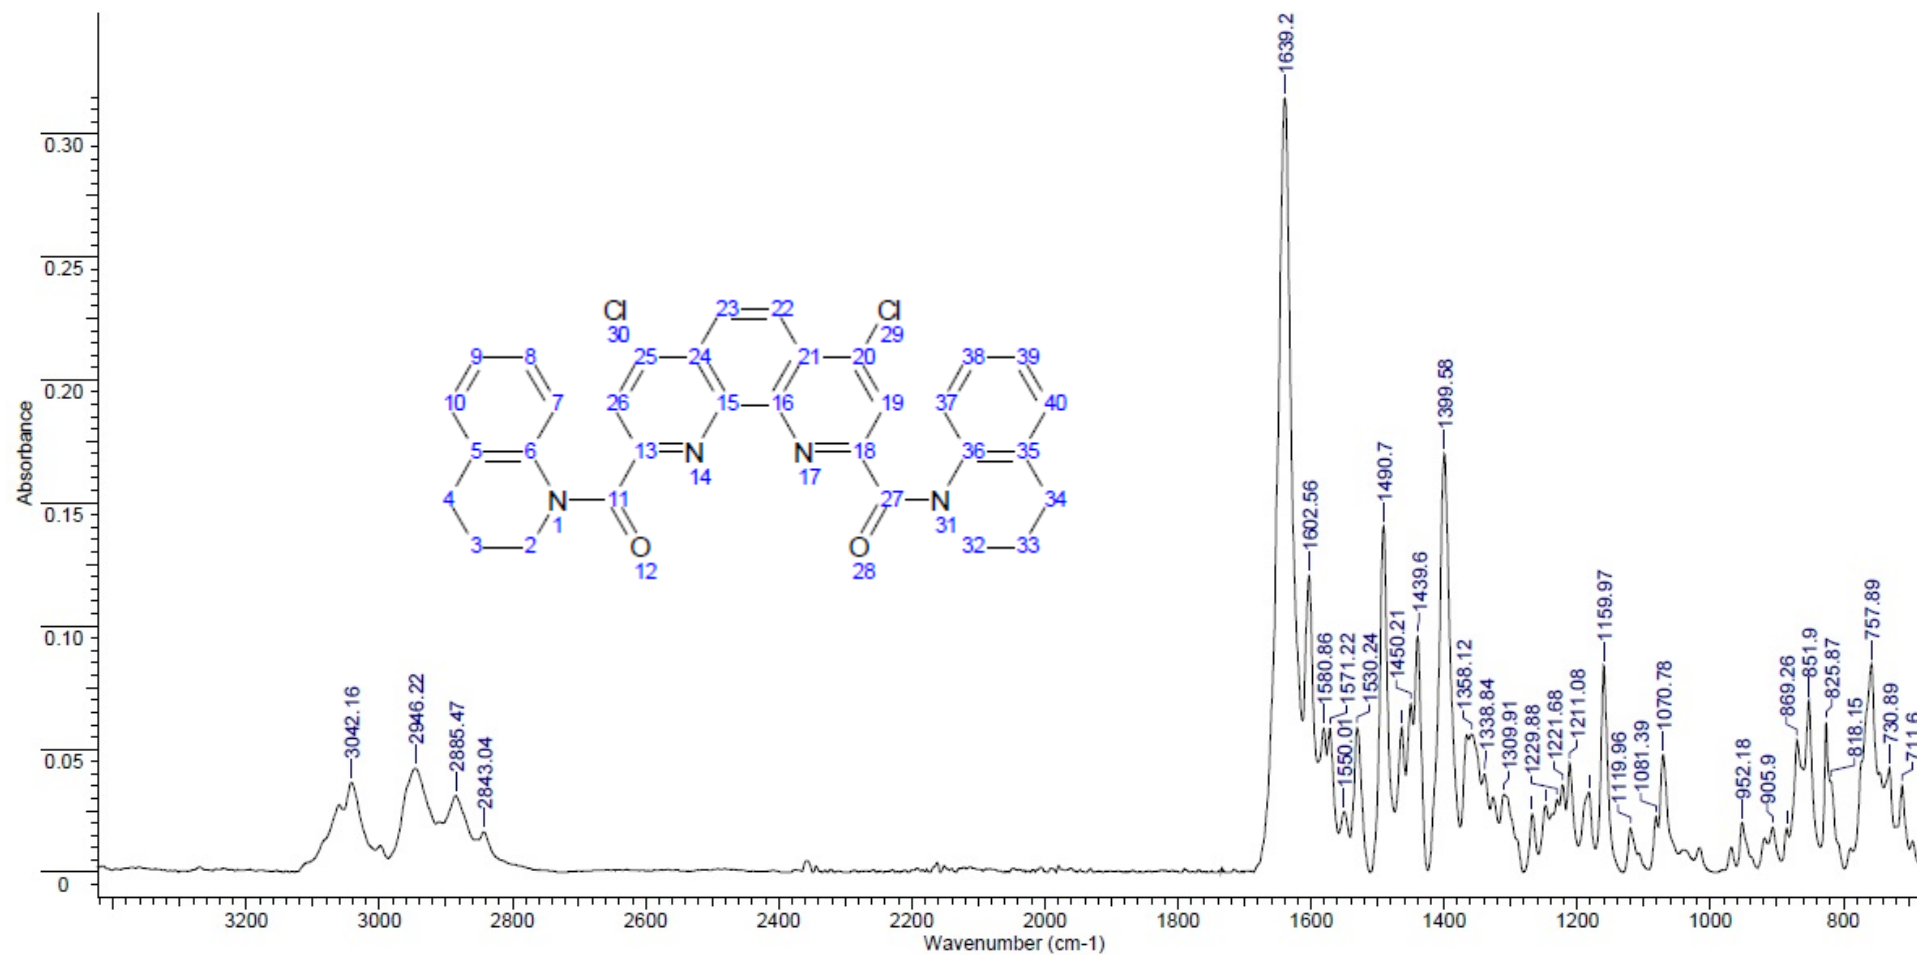

**9H-Carbazol-9-yl(9-(9H-carbazol-9-ylcarbonyl)-4,7-dichloro-1,10-phenanthrolin-2-yl)methanone 3h**

<sup>1</sup>H NMR spectra in CDCl<sub>3</sub> at 55°C, fragmental view (H-scale from 8.8 to 6.9 ppm)

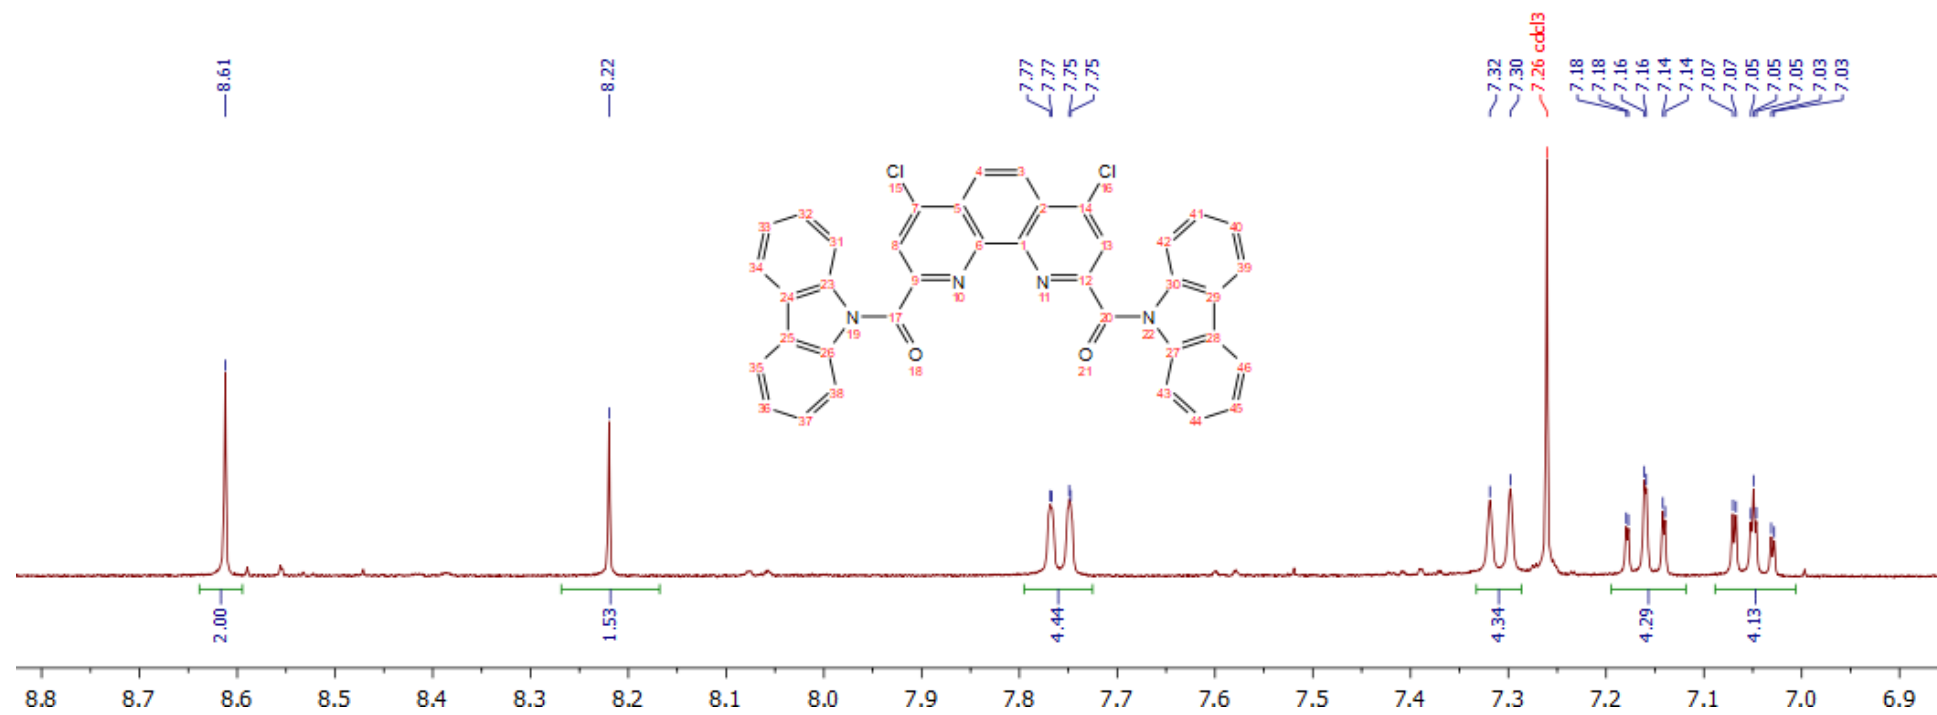

IR spectra at 25°C

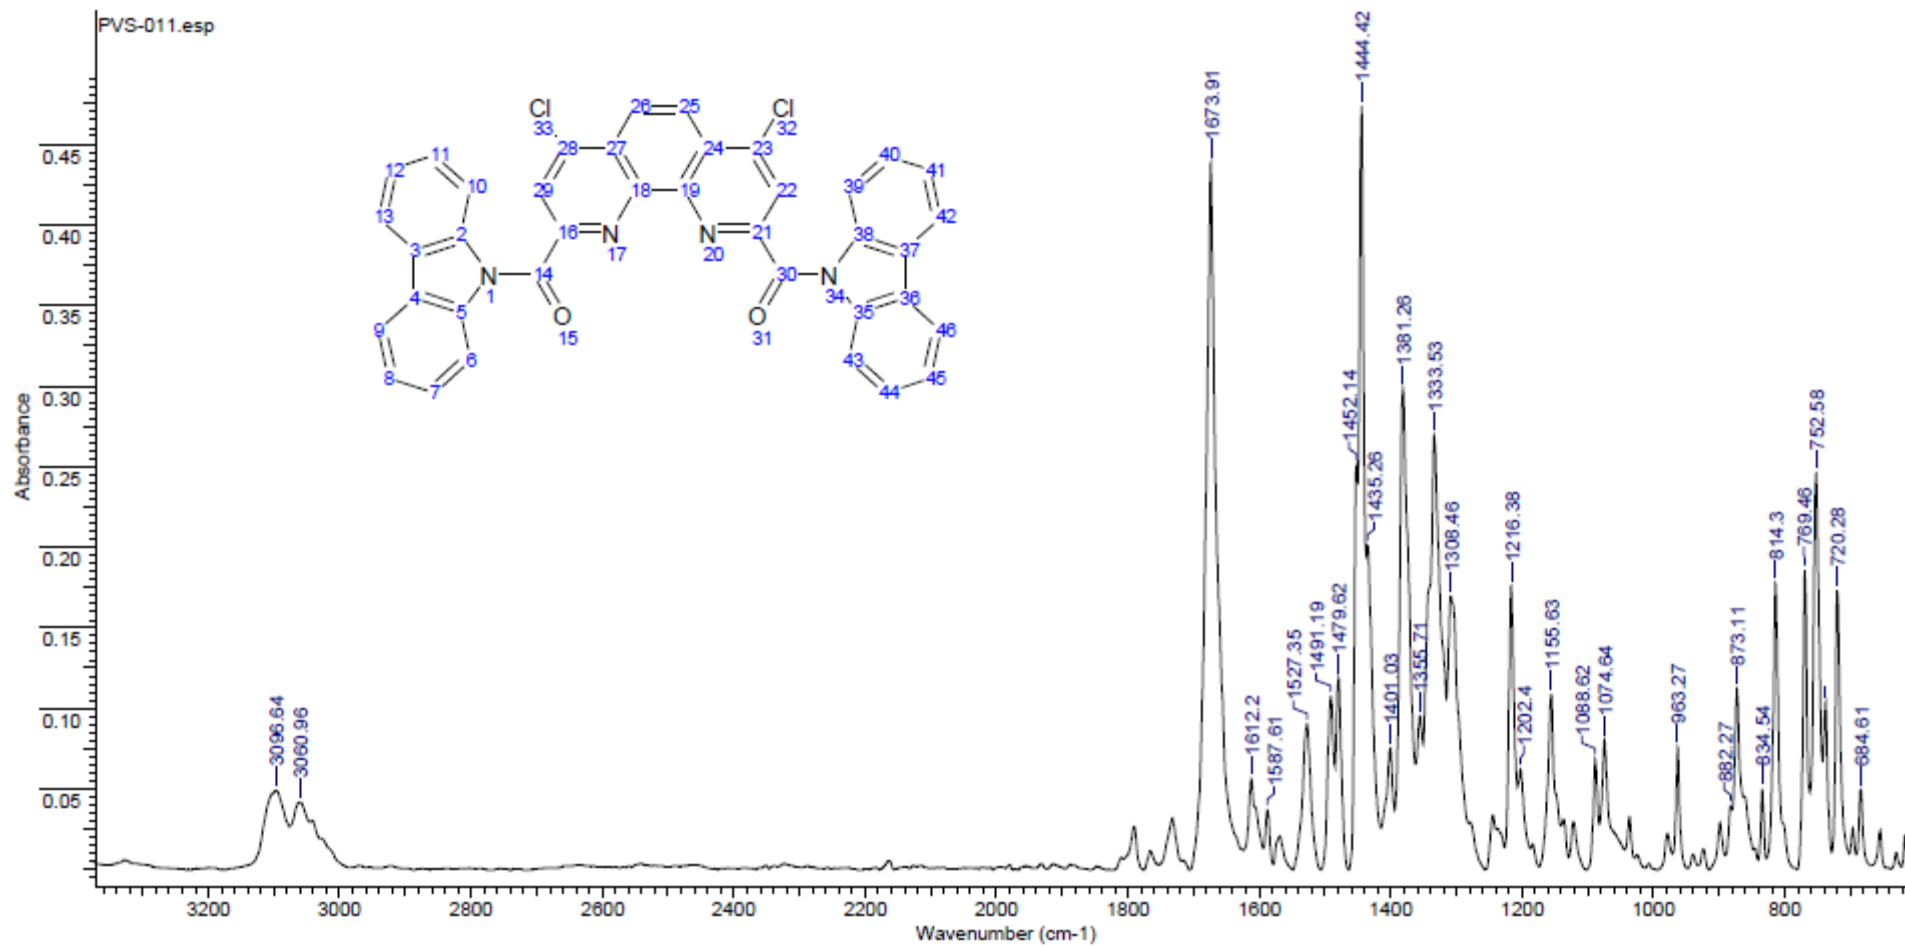

## Display Report

**Analysis Info**

Analysis Name D:\Data\Kolotyrkina\2019\Muzalevskiy\0711003.d  
 Method tune\_50-1600.m  
 Sample Name /MUSE PVS-011  
 Comment C38H20Cl2N4O2 mH 635.1036 clb added CH3CN

Acquisition Date 11.07.2019 11:49:58

Operator BDAL@DE  
 Instrument / Ser# micrOTOF 10248

**Acquisition Parameter**

|             |            |                      |          |                  |           |
|-------------|------------|----------------------|----------|------------------|-----------|
| Source Type | ESI        | Ion Polarity         | Positive | Set Nebulizer    | 1.0 Bar   |
| Focus       | Not active |                      |          | Set Dry Heater   | 200 °C    |
| Scan Begin  | 50 m/z     | Set Capillary        | 4500 V   | Set Dry Gas      | 4.0 l/min |
| Scan End    | 1600 m/z   | Set End Plate Offset | -500 V   | Set Divert Valve | Waste     |

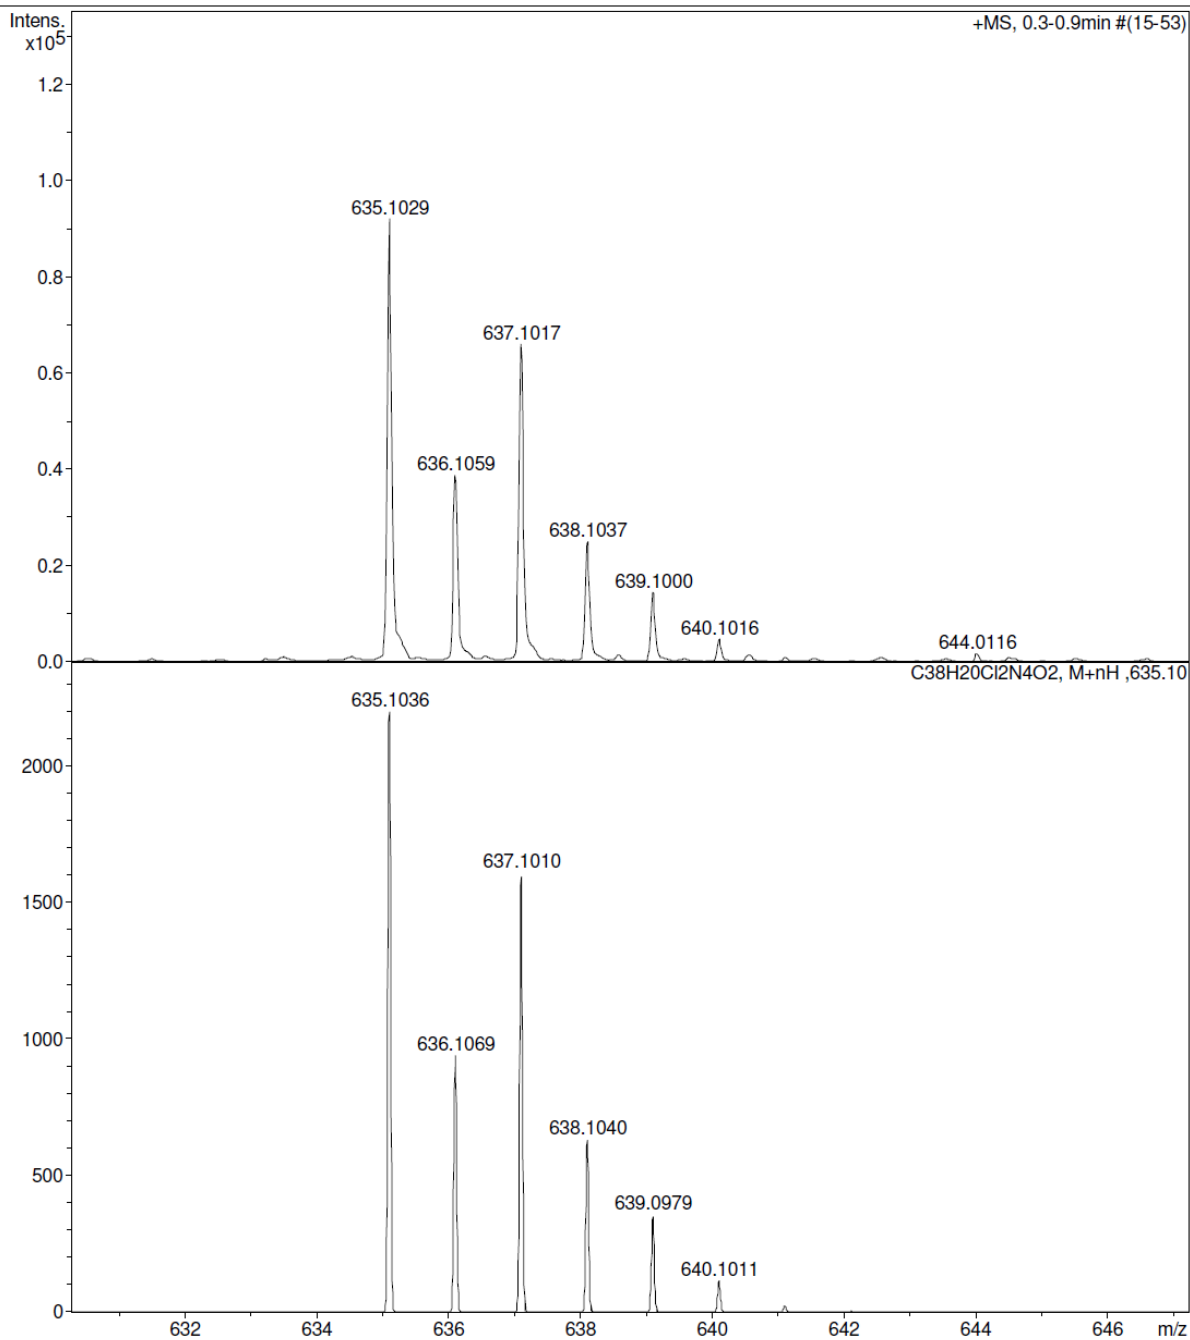

### 3. Extraction testing data

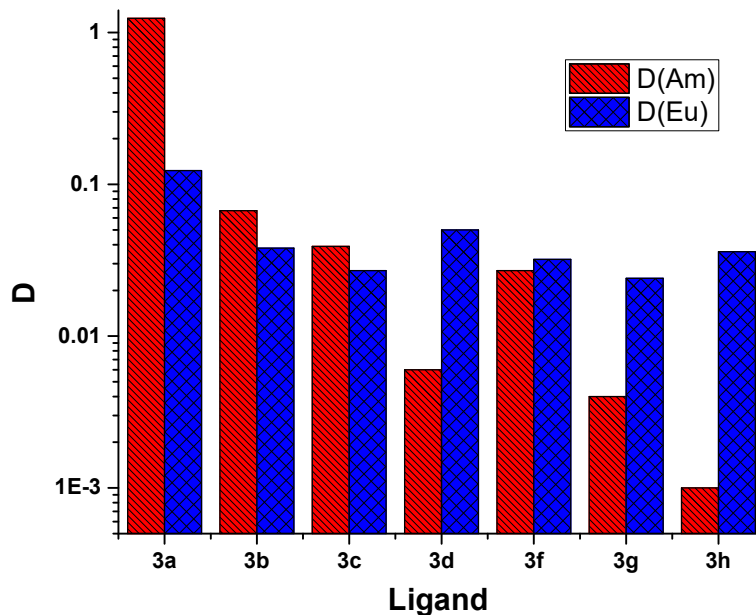

**Figure S1** The distribution ratios ( $D$ ) of  $\text{Am}^{3+}$  and  $\text{Eu}^{3+}$  for extraction from  $3 \text{ mol}\cdot\text{l}^{-1}$  nitric acid. The organic phase is saturated solutions of ligands in “F-3”.

### Solvation numbers for 3a

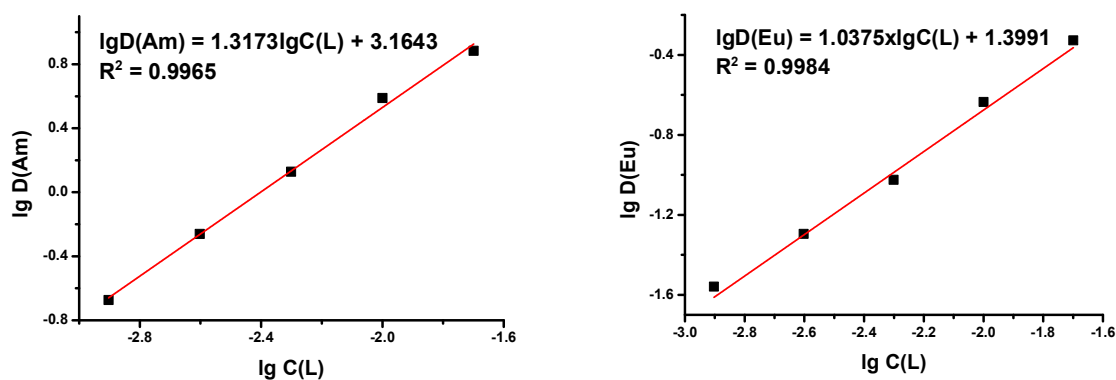

**Figure S2.**  $\lg D(\text{Am})$ - $\lg C(\text{L})$  and  $\lg D(\text{Eu})$ - $\lg C(\text{L})$  dependences for **3a** ligand. Aqueous phase –  $5 \text{ mol}\cdot\text{l}^{-1}$  nitric acid

**Table S1.** The distribution ratios ( $D$ ) of  $\text{Am}^{3+}$  and  $\text{Eu}^{3+}$  depending on the concentration of the ligand **3a** in “F-3” during extraction from  $5 \text{ mol}\cdot\text{l}^{-1}$   $\text{HNO}_3$ .

| <b>3a</b> , M | $D(\text{Am}^{3+})$ | $D(\text{Eu}^{3+})$ |
|---------------|---------------------|---------------------|
| 0.015         | 7.66                | 0.47                |
| 0.01          | 3.88                | 0.23                |
| 0.005         | 1.34                | 0.09                |
| 0.0025        | 0.55                | 0.05                |
| 0.00125       | 0.21                | 0.03                |



## 4. X-ray analysis data

### 4,7-dichloro-1,10-phenanthroline-2,9-dicarboxylic acid **1**.

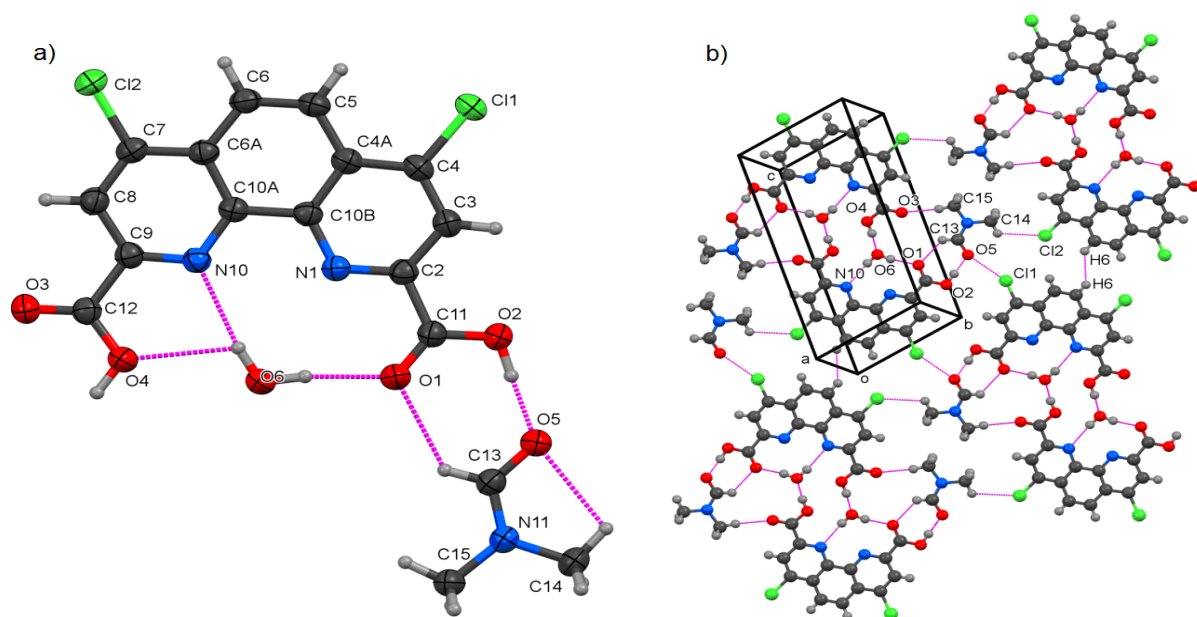

**Figure S3.** Asymmetric part of crystal structure of **1**·DMF·H<sub>2</sub>O (*a*) and packing diagram showing the layer structure (*b*). Thermal ellipsoids are drawn at the 70% probability level.

The molecule of **1** is closely planar, with the mean deviation of non-hydrogen atoms from the least-squared plane of 0.096(1) Å, and adopts in the crystal a *trans-cis* conformation (Fig. 4*a*). Data on bond lengths, flat and dihedral angles and intermolecular contacts in this structure are given in ESI (Table S4).

In the crystal of **1**·H<sub>2</sub>O·DMF, the molecules are linked by O–H···O and O–H···N hydrogen bonds into hexamers (**1**)<sub>2</sub>(H<sub>2</sub>O)<sub>2</sub>(DMF)<sub>2</sub> and further by Cl···O, Cl···H and H···H contacts – into flat layers parallel to the (2 1 -1) plane (Fig. 4*b*). These layers are joined by  $\pi$ - $\pi$  interactions, with the interplanar distance of 3.252(1) Å and the shortest intermolecular contact involving phenanthroline carbon atoms C4···C5 (1-*x*, 1-*y*, -*z*) of 3.406(2) Å. In contrast to three other structures presented in this work, in crystals of **1**·H<sub>2</sub>O·DMF, the phenanthroline fragments do not exhibit stacking. They are interlaced with DMF molecules of neighboring layers.

**Table S2.** Crystal data and structure refinement for **1·DMF·H<sub>2</sub>O**

|                                               |                                                                               |                |
|-----------------------------------------------|-------------------------------------------------------------------------------|----------------|
| Identification code                           | <b>1·DMF·H<sub>2</sub>O</b>                                                   |                |
| Empirical formula                             | C <sub>17</sub> H <sub>15</sub> Cl <sub>2</sub> N <sub>3</sub> O <sub>6</sub> |                |
| Formula weight                                | 428.22                                                                        |                |
| Temperature                                   | 100(2) K                                                                      |                |
| Wavelength                                    | 0.7879 Å                                                                      |                |
| Crystal system                                | Triclinic                                                                     |                |
| Space group                                   | <i>P</i> -1                                                                   |                |
| Unit cell dimensions                          | a = 7.1583(14) Å                                                              | α = 81.10(3)°. |
|                                               | b = 8.3520(17) Å                                                              | β = 82.92(3)°. |
|                                               | c = 15.356(3) Å                                                               | γ = 78.62(3)°. |
| Volume                                        | 885.1(3) Å <sup>3</sup>                                                       |                |
| Z                                             | 2                                                                             |                |
| Density (calculated)                          | 1.607 Mg/m <sup>3</sup>                                                       |                |
| Absorption coefficient                        | 0.538 mm <sup>-1</sup>                                                        |                |
| F(000)                                        | 440                                                                           |                |
| Crystal size                                  | 0.20 x 0.10 x 0.03 mm <sup>3</sup>                                            |                |
| Theta range for data collection               | 1.495 to 30.758°.                                                             |                |
| Index ranges                                  | -9<=h<=9, -10<=k<=10, -19<=l<=19                                              |                |
| Reflections collected                         | 15682                                                                         |                |
| Independent reflections                       | 4025 [R(int) = 0.0281]                                                        |                |
| Completeness to theta = 28.212°               | 99.4 %                                                                        |                |
| Absorption correction                         | Semi-empirical from equivalents                                               |                |
| Max. and min. transmission                    | 0.980 and 0.890                                                               |                |
| Refinement method                             | Full-matrix least-squares on F <sup>2</sup>                                   |                |
| Data / restraints / parameters                | 4025 / 4 / 268                                                                |                |
| Goodness-of-fit on F <sup>2</sup>             | 1.073                                                                         |                |
| Final R indices [for 3711 rflns with I>2σ(I)] | R1 = 0.0313, wR2 = 0.0871                                                     |                |
| R indices (all data)                          | R1 = 0.0335, wR2 = 0.0888                                                     |                |
| Extinction coefficient                        | 0.041(4)                                                                      |                |
| Largest diff. peak and hole                   | 0.297 and -0.241 e·Å <sup>-3</sup>                                            |                |

**Table S3.** Atomic coordinates ( $\times 10^4$ ) and equivalent isotropic displacement parameters ( $\text{\AA}^2 \times 10^3$ ) for **1-DMF·H<sub>2</sub>O**.  $U(\text{eq})$  is defined as one third of the trace of the orthogonalized  $U^{\text{ij}}$  tensor.

| Atom   | x        | y        | z       | $U(\text{eq})$ |
|--------|----------|----------|---------|----------------|
| Cl(1)  | 1854(1)  | 5842(1)  | -767(1) | 26(1)          |
| Cl(2)  | 6463(1)  | -1793(1) | 1981(1) | 30(1)          |
| O(1)   | 1395(2)  | 8576(1)  | 2859(1) | 36(1)          |
| O(2)   | 535(1)   | 9952(1)  | 1565(1) | 28(1)          |
| O(3)   | 6935(1)  | 687(1)   | 4889(1) | 31(1)          |
| O(4)   | 5182(1)  | 3232(1)  | 4748(1) | 29(1)          |
| N(1)   | 2753(2)  | 5792(1)  | 2093(1) | 23(1)          |
| C(2)   | 1908(2)  | 7128(2)  | 1604(1) | 24(1)          |
| C(3)   | 1610(2)  | 7200(2)  | 714(1)  | 24(1)          |
| C(4)   | 2205(2)  | 5788(2)  | 330(1)  | 24(1)          |
| C(4A)  | 3083(2)  | 4319(2)  | 819(1)  | 23(1)          |
| C(5)   | 3678(2)  | 2799(2)  | 463(1)  | 26(1)          |
| C(6)   | 4516(2)  | 1434(2)  | 963(1)  | 26(1)          |
| C(6A)  | 4859(2)  | 1464(2)  | 1856(1) | 23(1)          |
| C(7)   | 5751(2)  | 70(2)    | 2396(1) | 25(1)          |
| C(8)   | 6066(2)  | 168(2)   | 3243(1) | 26(1)          |
| C(9)   | 5481(2)  | 1703(2)  | 3552(1) | 24(1)          |
| N(10)  | 4618(1)  | 3054(1)  | 3081(1) | 22(1)          |
| C(10A) | 4302(2)  | 2939(2)  | 2242(1) | 22(1)          |
| C(10B) | 3349(2)  | 4408(2)  | 1710(1) | 22(1)          |
| C(11)  | 1253(2)  | 8631(2)  | 2072(1) | 25(1)          |
| C(12)  | 5936(2)  | 1818(2)  | 4475(1) | 24(1)          |
| O(5)   | -301(1)  | 2356(1)  | 2426(1) | 28(1)          |
| N(11)  | -216(2)  | 3298(1)  | 3726(1) | 25(1)          |
| C(13)  | 143(2)   | 2141(2)  | 3204(1) | 26(1)          |
| C(14)  | -1175(2) | 4964(2)  | 3428(1) | 30(1)          |
| C(15)  | 415(2)   | 2974(2)  | 4614(1) | 30(1)          |
| O(6)   | 6218(2)  | 3706(1)  | 6163(1) | 41(1)          |

**Table S4.** Bond lengths [Å] and angles [°] for **1-DMF·H<sub>2</sub>O**.

|                   |            |               |            |
|-------------------|------------|---------------|------------|
| Cl(1)-C(4)        | 1.7269(13) | C(6A)-C(10A)  | 1.4159(17) |
| Cl(2)-C(7)        | 1.7328(14) | C(7)-C(8)     | 1.3643(18) |
| O(1)-C(11)        | 1.2175(16) | C(8)-C(9)     | 1.4043(18) |
| O(2)-C(11)        | 1.3024(16) | C(8)-H(8)     | 0.9500     |
| O(2)-H(2)         | 0.92(2)    | C(9)-N(10)    | 1.3273(17) |
| O(3)-C(12)        | 1.2114(17) | C(9)-C(12)    | 1.5139(18) |
| O(4)-C(12)        | 1.3063(16) | N(10)-C(10A)  | 1.3549(16) |
| O(4)-H(4)         | 0.91(2)    | C(10A)-C(10B) | 1.4618(18) |
| N(1)-C(2)         | 1.3276(17) | O(5)-C(13)    | 1.2516(16) |
| N(1)-C(10B)       | 1.3489(17) | N(11)-C(13)   | 1.3165(17) |
| C(2)-C(3)         | 1.3994(17) | N(11)-C(14)   | 1.4569(17) |
| C(2)-C(11)        | 1.5088(17) | N(11)-C(15)   | 1.4569(17) |
| C(3)-C(4)         | 1.3690(19) | C(13)-H(13)   | 0.9500     |
| C(3)-H(3)         | 0.9500     | C(14)-H(14A)  | 0.9800     |
| C(4)-C(4A)        | 1.4110(18) | C(14)-H(14B)  | 0.9800     |
| C(4A)-C(10B)      | 1.4186(17) | C(14)-H(14C)  | 0.9800     |
| C(4A)-C(5)        | 1.4275(18) | C(15)-H(15A)  | 0.9800     |
| C(5)-C(6)         | 1.350(2)   | C(15)-H(15B)  | 0.9800     |
| C(5)-H(5)         | 0.9500     | C(15)-H(15C)  | 0.9800     |
| C(6)-C(6A)        | 1.4273(18) | O(6)-H(6A)    | 0.89(2)    |
| C(6)-H(6)         | 0.9500     | O(6)-H(6B)    | 0.88(2)    |
| C(6A)-C(7)        | 1.4104(18) |               |            |
| C(11)-O(2)-H(2)   | 109.4(13)  |               |            |
| C(12)-O(4)-H(4)   | 112.1(12)  |               |            |
| C(2)-N(1)-C(10B)  | 117.83(11) |               |            |
| N(1)-C(2)-C(3)    | 124.32(12) |               |            |
| N(1)-C(2)-C(11)   | 115.39(11) |               |            |
| C(3)-C(2)-C(11)   | 120.29(11) |               |            |
| C(4)-C(3)-C(2)    | 117.56(12) |               |            |
| C(4)-C(3)-H(3)    | 121.2      |               |            |
| C(2)-C(3)-H(3)    | 121.2      |               |            |
| C(3)-C(4)-C(4A)   | 120.88(12) |               |            |
| C(3)-C(4)-Cl(1)   | 118.49(10) |               |            |
| C(4A)-C(4)-Cl(1)  | 120.62(10) |               |            |
| C(4)-C(4A)-C(10B) | 116.41(12) |               |            |
| C(4)-C(4A)-C(5)   | 123.36(12) |               |            |
| C(10B)-C(4A)-C(5) | 120.22(12) |               |            |
| C(6)-C(5)-C(4A)   | 120.64(12) |               |            |
| C(6)-C(5)-H(5)    | 119.7      |               |            |

|                     |            |
|---------------------|------------|
| C(4A)-C(5)-H(5)     | 119.7      |
| C(5)-C(6)-C(6A)     | 121.46(12) |
| C(5)-C(6)-H(6)      | 119.3      |
| C(6A)-C(6)-H(6)     | 119.3      |
| C(7)-C(6A)-C(10A)   | 116.52(11) |
| C(7)-C(6A)-C(6)     | 123.20(12) |
| C(10A)-C(6A)-C(6)   | 120.28(12) |
| C(8)-C(7)-C(6A)     | 120.93(12) |
| C(8)-C(7)-Cl(2)     | 119.37(10) |
| C(6A)-C(7)-Cl(2)    | 119.70(10) |
| C(7)-C(8)-C(9)      | 117.61(12) |
| C(7)-C(8)-H(8)      | 121.2      |
| C(9)-C(8)-H(8)      | 121.2      |
| N(10)-C(9)-C(8)     | 124.37(12) |
| N(10)-C(9)-C(12)    | 118.51(11) |
| C(8)-C(9)-C(12)     | 117.08(11) |
| C(9)-N(10)-C(10A)   | 117.48(11) |
| N(10)-C(10A)-C(6A)  | 123.08(12) |
| N(10)-C(10A)-C(10B) | 118.57(11) |
| C(6A)-C(10A)-C(10B) | 118.34(11) |
| N(1)-C(10B)-C(4A)   | 122.97(12) |
| N(1)-C(10B)-C(10A)  | 118.03(11) |
| C(4A)-C(10B)-C(10A) | 119.00(11) |
| O(1)-C(11)-O(2)     | 124.22(12) |
| O(1)-C(11)-C(2)     | 121.54(12) |
| O(2)-C(11)-C(2)     | 114.24(11) |
| O(3)-C(12)-O(4)     | 125.47(12) |
| O(3)-C(12)-C(9)     | 121.15(12) |
| O(4)-C(12)-C(9)     | 113.37(11) |
| C(13)-N(11)-C(14)   | 121.56(12) |
| C(13)-N(11)-C(15)   | 120.97(11) |
| C(14)-N(11)-C(15)   | 117.41(11) |
| O(5)-C(13)-N(11)    | 124.03(12) |
| O(5)-C(13)-H(13)    | 118.0      |
| N(11)-C(13)-H(13)   | 118.0      |
| N(11)-C(14)-H(14A)  | 109.5      |
| N(11)-C(14)-H(14B)  | 109.5      |
| H(14A)-C(14)-H(14B) | 109.5      |
| N(11)-C(14)-H(14C)  | 109.5      |
| H(14A)-C(14)-H(14C) | 109.5      |
| H(14B)-C(14)-H(14C) | 109.5      |
| N(11)-C(15)-H(15A)  | 109.5      |

|                     |        |
|---------------------|--------|
| N(11)-C(15)-H(15B)  | 109.5  |
| H(15A)-C(15)-H(15B) | 109.5  |
| N(11)-C(15)-H(15C)  | 109.5  |
| H(15A)-C(15)-H(15C) | 109.5  |
| H(15B)-C(15)-H(15C) | 109.5  |
| H(6A)-O(6)-H(6B)    | 111(2) |

---

**Table S5.** Anisotropic displacement parameters ( $\text{\AA}^2 \times 10^3$ ) for **1·DMF·H<sub>2</sub>O**. The anisotropic displacement factor exponent takes the form:  $-2\pi^2 [ h^2 a^{*2}U^{11} + \dots + 2 h k a^* b^* U^{12} ]$

| Atom   | U <sup>11</sup> | U <sup>22</sup> | U <sup>33</sup> | U <sup>23</sup> | U <sup>13</sup> | U <sup>12</sup> |
|--------|-----------------|-----------------|-----------------|-----------------|-----------------|-----------------|
| Cl(1)  | 29(1)           | 30(1)           | 20(1)           | -3(1)           | -5(1)           | -6(1)           |
| Cl(2)  | 37(1)           | 21(1)           | 31(1)           | -7(1)           | -5(1)           | -2(1)           |
| O(1)   | 51(1)           | 27(1)           | 27(1)           | -7(1)           | -12(1)          | 6(1)            |
| O(2)   | 36(1)           | 22(1)           | 26(1)           | -3(1)           | -7(1)           | -1(1)           |
| O(3)   | 37(1)           | 27(1)           | 29(1)           | -2(1)           | -11(1)          | 0(1)            |
| O(4)   | 35(1)           | 27(1)           | 25(1)           | -7(1)           | -9(1)           | 2(1)            |
| N(1)   | 24(1)           | 23(1)           | 23(1)           | -4(1)           | -3(1)           | -3(1)           |
| C(2)   | 23(1)           | 24(1)           | 24(1)           | -4(1)           | -3(1)           | -4(1)           |
| C(3)   | 24(1)           | 25(1)           | 23(1)           | -1(1)           | -4(1)           | -4(1)           |
| C(4)   | 23(1)           | 29(1)           | 20(1)           | -2(1)           | -3(1)           | -6(1)           |
| C(4A)  | 21(1)           | 26(1)           | 23(1)           | -4(1)           | -1(1)           | -5(1)           |
| C(5)   | 29(1)           | 29(1)           | 22(1)           | -6(1)           | -2(1)           | -6(1)           |
| C(6)   | 29(1)           | 24(1)           | 25(1)           | -7(1)           | -1(1)           | -5(1)           |
| C(6A)  | 24(1)           | 24(1)           | 23(1)           | -4(1)           | -1(1)           | -5(1)           |
| C(7)   | 26(1)           | 22(1)           | 27(1)           | -5(1)           | -1(1)           | -4(1)           |
| C(8)   | 28(1)           | 23(1)           | 27(1)           | -2(1)           | -4(1)           | -3(1)           |
| C(9)   | 23(1)           | 24(1)           | 24(1)           | -3(1)           | -3(1)           | -4(1)           |
| N(10)  | 22(1)           | 23(1)           | 22(1)           | -3(1)           | -3(1)           | -3(1)           |
| C(10A) | 22(1)           | 23(1)           | 22(1)           | -4(1)           | -2(1)           | -5(1)           |
| C(10B) | 21(1)           | 23(1)           | 22(1)           | -4(1)           | -2(1)           | -4(1)           |
| C(11)  | 26(1)           | 23(1)           | 26(1)           | -3(1)           | -5(1)           | -2(1)           |
| C(12)  | 24(1)           | 24(1)           | 24(1)           | -2(1)           | -3(1)           | -5(1)           |
| O(5)   | 34(1)           | 26(1)           | 25(1)           | -4(1)           | -5(1)           | -2(1)           |
| N(11)  | 26(1)           | 22(1)           | 26(1)           | -4(1)           | -3(1)           | -1(1)           |
| C(13)  | 26(1)           | 23(1)           | 27(1)           | -4(1)           | -3(1)           | -2(1)           |
| C(14)  | 33(1)           | 22(1)           | 33(1)           | -4(1)           | -4(1)           | 0(1)            |
| C(15)  | 33(1)           | 29(1)           | 28(1)           | -7(1)           | -7(1)           | 0(1)            |
| O(6)   | 59(1)           | 31(1)           | 31(1)           | -12(1)          | -22(1)          | 12(1)           |

**Table S6.** Hydrogen coordinates ( $\times 10^4$ ) and isotropic displacement parameters ( $\text{\AA}^2 \times 10^3$ ) for **1-DMF·H<sub>2</sub>O**.

| Atom   | x        | y         | z        | U(iso) |
|--------|----------|-----------|----------|--------|
| H(2)   | 290(30)  | 10835(18) | 1877(12) | 43     |
| H(4)   | 5540(30) | 3310(20)  | 5286(8)  | 44     |
| H(3)   | 1016     | 8192      | 388      | 29     |
| H(5)   | 3483     | 2747      | -132     | 31     |
| H(6)   | 4886     | 431       | 715      | 31     |
| H(8)   | 6661     | -769      | 3610     | 31     |
| H(13)  | 779      | 1077      | 3432     | 31     |
| H(14A) | -289     | 5732      | 3403     | 45     |
| H(14B) | -2295    | 5277      | 3844     | 45     |
| H(14C) | -1586    | 5007      | 2838     | 45     |
| H(15A) | 1002     | 1810      | 4740     | 45     |
| H(15B) | -688     | 3231      | 5047     | 45     |
| H(15C) | 1354     | 3665      | 4651     | 45     |
| H(6A)  | 6970(30) | 3010(20)  | 6526(12) | 61     |
| H(6B)  | 5930(30) | 4693(16)  | 6337(14) | 61     |



**Table S7.** Torsion angles [°] for **1·DMF·H<sub>2</sub>O**.

|                          |             |                           |             |
|--------------------------|-------------|---------------------------|-------------|
| C(10B)-N(1)-C(2)-C(3)    | -0.62(18)   | C(4A)-C(5)-C(6)-C(6A)     | -0.8(2)     |
| C(10B)-N(1)-C(2)-C(11)   | 179.32(10)  | C(5)-C(6)-C(6A)-C(7)      | -179.23(12) |
| N(1)-C(2)-C(3)-C(4)      | 1.07(19)    | C(5)-C(6)-C(6A)-C(10A)    | 0.68(19)    |
| C(11)-C(2)-C(3)-C(4)     | -178.87(11) | C(10A)-C(6A)-C(7)-C(8)    | -0.68(18)   |
| C(2)-C(3)-C(4)-C(4A)     | 0.11(18)    | C(6)-C(6A)-C(7)-C(8)      | 179.22(12)  |
| C(2)-C(3)-C(4)-Cl(1)     | 179.96(9)   | C(10A)-C(6A)-C(7)-Cl(2)   | 179.48(9)   |
| C(3)-C(4)-C(4A)-C(10B)   | -1.55(17)   | C(6)-C(6A)-C(7)-Cl(2)     | -0.61(17)   |
| Cl(1)-C(4)-C(4A)-C(10B)  | 178.60(9)   | C(6A)-C(7)-C(8)-C(9)      | -0.31(19)   |
| C(3)-C(4)-C(4A)-C(5)     | 177.99(11)  | Cl(2)-C(7)-C(8)-C(9)      | 179.53(9)   |
| Cl(1)-C(4)-C(4A)-C(5)    | -1.87(17)   | C(7)-C(8)-C(9)-N(10)      | 1.03(19)    |
| C(4)-C(4A)-C(5)-C(6)     | 179.81(12)  | C(7)-C(8)-C(9)-C(12)      | -176.74(11) |
| C(10B)-C(4A)-C(5)-C(6)   | -0.68(19)   | C(8)-C(9)-N(10)-C(10A)    | -0.64(18)   |
| C(9)-N(10)-C(10A)-C(6A)  | -0.49(17)   | C(12)-C(9)-N(10)-C(10A)   | 177.11(10)  |
| C(9)-N(10)-C(10A)-C(10B) | 179.80(11)  | N(10)-C(10A)-C(10B)-C(4A) | 177.37(10)  |
| C(7)-C(6A)-C(10A)-N(10)  | 1.12(18)    | C(6A)-C(10A)-C(10B)-C(4A) | -2.35(17)   |
| C(6)-C(6A)-C(10A)-N(10)  | -178.79(11) | N(1)-C(2)-C(11)-O(1)      | -4.26(18)   |
| C(7)-C(6A)-C(10A)-C(10B) | -179.16(11) | C(3)-C(2)-C(11)-O(1)      | 175.68(12)  |
| C(6)-C(6A)-C(10A)-C(10B) | 0.93(17)    | N(1)-C(2)-C(11)-O(2)      | 176.00(11)  |
| C(2)-N(1)-C(10B)-C(4A)   | -1.02(18)   | C(3)-C(2)-C(11)-O(2)      | -4.06(17)   |
| C(2)-N(1)-C(10B)-C(10A)  | 179.24(11)  | N(10)-C(9)-C(12)-O(3)     | -170.34(12) |
| C(4)-C(4A)-C(10B)-N(1)   | 2.06(17)    | C(8)-C(9)-C(12)-O(3)      | 7.57(18)    |
| C(5)-C(4A)-C(10B)-N(1)   | -177.49(11) | N(10)-C(9)-C(12)-O(4)     | 8.52(16)    |
| C(4)-C(4A)-C(10B)-C(10A) | -178.19(10) | C(8)-C(9)-C(12)-O(4)      | -173.57(11) |
| C(5)-C(4A)-C(10B)-C(10A) | 2.26(17)    | C(14)-N(11)-C(13)-O(5)    | -0.4(2)     |
| N(10)-C(10A)-C(10B)-N(1) | -2.87(17)   | C(15)-N(11)-C(13)-O(5)    | -177.43(12) |
| C(6A)-C(10A)-C(10B)-N(1) | 177.40(10)  |                           |             |

**Table S8.** Hydrogen bonds for **1·DMF·H<sub>2</sub>O** [ $\text{\AA}$  and  $^\circ$ ].

| D-H...A               | d(D-H)  | d(H...A) | d(D...A)   | $\angle$ (DHA) |
|-----------------------|---------|----------|------------|----------------|
| O(2)-H(2)...O(5)#1    | 0.92(2) | 1.59(2)  | 2.5086(15) | 175.6(19)      |
| O(4)-H(4)...O(6)      | 0.91(2) | 1.59(2)  | 2.4919(15) | 171.4(19)      |
| C(13)-H(13)...O(1)#2  | 0.95    | 2.33     | 3.0445(18) | 131.2          |
| C(15)-H(15A)...O(3)#3 | 0.98    | 2.34     | 3.298(2)   | 165.4          |
| O(6)-H(6A)...O(1)#4   | 0.89(2) | 1.81(2)  | 2.6964(18) | 172(2)         |
| O(6)-H(6B)...O(4)#4   | 0.88(2) | 2.30(2)  | 2.7802(17) | 113.9(17)      |
| O(6)-H(6B)...N(10)#4  | 0.88(2) | 2.15(2)  | 3.0316(17) | 172(2)         |

Symmetry transformations used to generate equivalent atoms:

#1 x, y+1, z #2 x, y-1, z #3 -x+1, -y, -z+1 #4 -x+1, -y+1, -z+1

**1,10-phenantroline-4,7-dichloro-2,9-diylbis(pyrrolidin-1-yl-methanone) 3a**

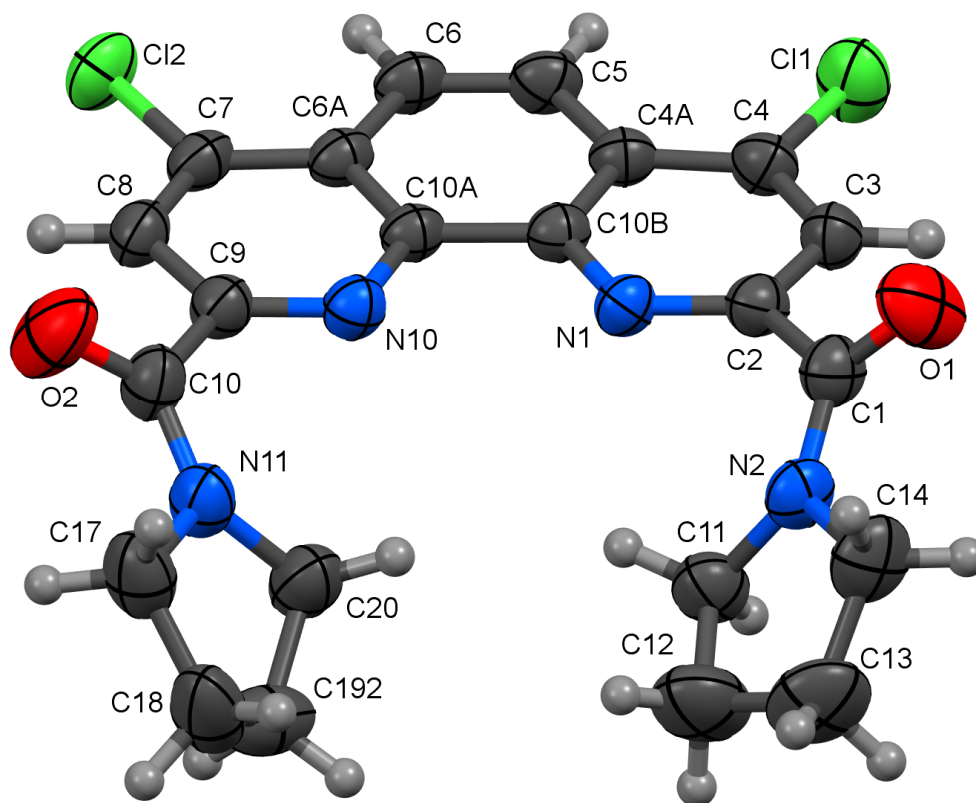

**Table S9.** Crystal data and structure refinement for **3a**.

|                                 |                                                                                                               |
|---------------------------------|---------------------------------------------------------------------------------------------------------------|
| Identification code             | <b>3a</b>                                                                                                     |
| Empirical formula               | C <sub>22</sub> H <sub>20</sub> Cl <sub>2</sub> N <sub>4</sub> O <sub>2</sub>                                 |
| Formula weight                  | 443.32                                                                                                        |
| Temperature                     | 293(2) K                                                                                                      |
| Wavelength                      | 1.54186 Å                                                                                                     |
| Crystal system, space group     | Triclinic, P-1                                                                                                |
| Unit cell dimensions            | a = 7.7488(3) Å    α = 79.974(3)°<br>b = 10.1002(4) Å    β = 76.276(3)°<br>c = 13.5780(5) Å    γ = 83.821(3)° |
| Volume                          | 1014.12(7) Å <sup>3</sup>                                                                                     |
| Z, Calculated density           | 2, 1.452 Mg/m <sup>3</sup>                                                                                    |
| Absorption coefficient          | 3.110 mm <sup>-1</sup>                                                                                        |
| F(000)                          | 460                                                                                                           |
| Crystal size                    | 0.22 x 0.18 x 0.02 mm                                                                                         |
| Theta range for data collection | 4.456 to 67.977°                                                                                              |
| Limiting indices                | -4 ≤ h ≤ 9, -9 ≤ k ≤ 12, -16 ≤ l ≤ 16                                                                         |
| Reflections collected / unique  | 8085 / 3593 [R(int) = 0.0232]                                                                                 |
| Completeness to theta = 67.686° | 97.2 %                                                                                                        |
| Absorption correction           | Multi-scan                                                                                                    |

|                                   |                                             |
|-----------------------------------|---------------------------------------------|
| Max. and min. transmission        | 0.953 and 0.672                             |
| Refinement method                 | Full-matrix least-squares on F <sup>2</sup> |
| Data / restraints / parameters    | 3593 / 0 / 281                              |
| Goodness-of-fit on F <sup>2</sup> | 1.025                                       |
| Final R indices [I>2sigma(I)]     | R1 = 0.0432, wR2 = 0.1222                   |
| R indices (all data)              | R1 = 0.0603, wR2 = 0.1295                   |
| Extinction coefficient            | n/a                                         |
| Largest diff. peak and hole       | 0.306 and -0.295 e·Å <sup>-3</sup>          |

**Table S10.** Atomic coordinates ( $\times 10^4$ ) and equivalent isotropic displacement parameters ( $\text{\AA}^2 \times 10^3$ ) for **3a**.  $U(\text{eq})$  is defined as one third of the trace of the orthogonalized  $U_{ij}$  tensor.

|        | x         | y        | z        | $U(\text{eq})$ |
|--------|-----------|----------|----------|----------------|
| Cl(1)  | 1025(1)   | 9026(1)  | 5934(1)  | 70(1)          |
| Cl(2)  | 3076(1)   | 2109(1)  | 4436(1)  | 60(1)          |
| N(1)   | 4006(2)   | 5707(2)  | 7680(1)  | 41(1)          |
| N(2)   | 5645(3)   | 6753(2)  | 9114(2)  | 50(1)          |
| N(10)  | 4822(2)   | 3232(2)  | 7112(2)  | 43(1)          |
| N(11)  | 7470(3)   | 1310(2)  | 7851(2)  | 54(1)          |
| O(1)   | 2842(3)   | 7632(3)  | 9555(2)  | 82(1)          |
| O(2)   | 5727(3)   | -203(2)  | 7639(2)  | 87(1)          |
| C(2)   | 3620(3)   | 6913(2)  | 7955(2)  | 43(1)          |
| C(3)   | 2687(3)   | 7969(3)  | 7437(2)  | 48(1)          |
| C(4)   | 2140(3)   | 7732(2)  | 6609(2)  | 46(1)          |
| C(4A)  | 2465(3)   | 6453(2)  | 6286(2)  | 42(1)          |
| C(5)   | 1913(3)   | 6120(3)  | 5441(2)  | 48(1)          |
| C(6)   | 2308(3)   | 4888(3)  | 5158(2)  | 47(1)          |
| C(6A)  | 3288(3)   | 3864(2)  | 5710(2)  | 41(1)          |
| C(7)   | 3725(3)   | 2557(3)  | 5463(2)  | 46(1)          |
| C(8)   | 4656(3)   | 1617(3)  | 6031(2)  | 48(1)          |
| C(9)   | 5194(3)   | 2016(2)  | 6841(2)  | 45(1)          |
| C(10A) | 3866(3)   | 4141(2)  | 6554(2)  | 39(1)          |
| C(10B) | 3440(3)   | 5471(2)  | 6861(2)  | 39(1)          |
| C(1)   | 4036(3)   | 7132(3)  | 8940(2)  | 49(1)          |
| C(10)  | 6169(4)   | 955(3)   | 7482(2)  | 54(1)          |
| C(11)  | 7239(3)   | 6334(3)  | 8376(2)  | 61(1)          |
| C(12)  | 8571(5)   | 5904(5)  | 9021(3)  | 94(1)          |
| C(13)  | 8041(5)   | 6577(4)  | 9915(3)  | 90(1)          |
| C(14)  | 6068(4)   | 6932(3)  | 10080(2) | 68(1)          |
| C(17)  | 8400(4)   | 302(3)   | 8502(3)  | 70(1)          |
| C(18)  | 9914(5)   | 1015(4)  | 8636(4)  | 92(1)          |
| C(191) | 9660(30)  | 2590(20) | 8171(15) | 61(4)          |
| C(192) | 10121(10) | 2111(12) | 7844(8)  | 75(2)          |
| C(20)  | 8315(4)   | 2587(3)  | 7610(3)  | 68(1)          |

**Table S11.** Bond lengths [Å] and angles [°] for **3a**.

|                      |           |                        |           |
|----------------------|-----------|------------------------|-----------|
| C1 (1)-C (4)         | 1.735 (2) | C (4A)-C (10B)         | 1.418 (3) |
| C1 (2)-C (7)         | 1.734 (2) | C (4A)-C (5)           | 1.419 (3) |
| N (1)-C (2)          | 1.319 (3) | C (5)-C (6)            | 1.349 (4) |
| N (1)-C (10B)        | 1.353 (3) | C (6)-C (6A)           | 1.429 (3) |
| N (2)-C (1)          | 1.328 (3) | C (6A)-C (7)           | 1.404 (3) |
| N (2)-C (11)         | 1.468 (3) | C (6A)-C (10A)         | 1.405 (3) |
| N (2)-C (14)         | 1.469 (3) | C (7)-C (8)            | 1.370 (4) |
| N (10)-C (9)         | 1.326 (3) | C (8)-C (9)            | 1.397 (3) |
| N (10)-C (10A)       | 1.357 (3) | C (9)-C (10)           | 1.513 (3) |
| N (11)-C (10)        | 1.332 (3) | C (10A)-C (10B)        | 1.456 (3) |
| N (11)-C (20)        | 1.461 (4) | C (11)-C (12)          | 1.490 (4) |
| N (11)-C (17)        | 1.473 (3) | C (12)-C (13)          | 1.448 (5) |
| O (1)-C (1)          | 1.220 (3) | C (13)-C (14)          | 1.505 (5) |
| O (2)-C (10)         | 1.223 (3) | C (17)-C (18)          | 1.502 (5) |
| C (2)-C (3)          | 1.404 (3) | C (18)-C (192)         | 1.396 (8) |
| C (2)-C (1)          | 1.504 (3) | C (18)-C (191)         | 1.61 (2)  |
| C (3)-C (4)          | 1.357 (3) | C (191)-C (20)         | 1.43 (1)  |
| C (4)-C (4A)         | 1.414 (3) | C (192)-C (20)         | 1.518 (8) |
|                      |           |                        |           |
| C (2)-N (1)-C (10B)  | 118.0 (2) | N (10)-C (9)-C (8)     | 124.3 (2) |
| C (1)-N (2)-C (11)   | 127.2 (2) | N (10)-C (9)-C (10)    | 118.5 (2) |
| C (1)-N (2)-C (14)   | 120.4 (2) | C (8)-C (9)-C (10)     | 117.2 (2) |
| C (11)-N (2)-C (14)  | 111.7 (2) | N (10)-C (10A)-C (6A)  | 123.6 (2) |
| C (9)-N (10)-C (10A) | 117.1 (2) | N (10)-C (10A)-C (10B) | 117.1 (2) |
| C (10)-N (11)-C (20) | 128.7 (2) | C (6A)-C (10A)-C (10B) | 119.3 (2) |
| C (10)-N (11)-C (17) | 120.1 (2) | N (1)-C (10B)-C (4A)   | 123.4 (2) |
| C (20)-N (11)-C (17) | 110.8 (2) | N (1)-C (10B)-C (10A)  | 118.0 (2) |
| N (1)-C (2)-C (3)    | 123.7 (2) | C (4A)-C (10B)-C (10A) | 118.6 (2) |
| N (1)-C (2)-C (1)    | 118.3 (2) | O (1)-C (1)-N (2)      | 123.1 (2) |
| C (3)-C (2)-C (1)    | 117.7 (2) | O (1)-C (1)-C (2)      | 117.4 (2) |
| C (4)-C (3)-C (2)    | 118.1 (2) | N (2)-C (1)-C (2)      | 119.5 (2) |
| C (3)-C (4)-C (4A)   | 121.2 (2) | O (2)-C (10)-N (11)    | 122.5 (2) |
| C (3)-C (4)-C1 (1)   | 119.3 (2) | O (2)-C (10)-C (9)     | 118.2 (2) |
| C (4A)-C (4)-C1 (1)  | 119.5 (2) | N (11)-C (10)-C (9)    | 119.3 (2) |
| C (4)-C (4A)-C (10B) | 115.6 (2) | N (2)-C (11)-C (12)    | 103.2 (2) |
| C (4)-C (4A)-C (5)   | 124.6 (2) | C (13)-C (12)-C (11)   | 107.9 (3) |
| C (10B)-C (4A)-C (5) | 119.8 (2) | C (12)-C (13)-C (14)   | 107.5 (2) |
| C (6)-C (5)-C (4A)   | 121.5 (2) | N (2)-C (14)-C (13)    | 103.9 (3) |
| C (5)-C (6)-C (6A)   | 120.9 (2) | N (11)-C (17)-C (18)   | 104.6 (3) |
| C (7)-C (6A)-C (10A) | 116.4 (2) | C (192)-C (18)-C (17)  | 105.2 (4) |

|                        |           |                         |            |
|------------------------|-----------|-------------------------|------------|
| C (7) -C (6A) -C (6)   | 123.7 (2) | C (17) -C (18) -C (191) | 108.5 (6)  |
| C (10A) -C (6A) -C (6) | 119.9 (2) | C (20) -C (191) -C (18) | 102.3 (11) |
| C (8) -C (7) -C (6A)   | 120.8 (2) | C (18) -C (192) -C (20) | 108.8 (5)  |
| C (8) -C (7) -C1 (2)   | 119.0 (2) | C (191) -C (20) -N (11) | 112.1 (8)  |
| C (6A) -C (7) -C1 (2)  | 120.2 (2) | N (11) -C (20) -C (192) | 100.2 (4)  |
| C (7) -C (8) -C (9)    | 117.7 (2) |                         |            |

---

**Table S12.** Anisotropic displacement parameters ( $\text{\AA}^2 \times 10^3$ ) for **3a**.

The anisotropic displacement factor exponent takes the form:

$$-2\pi^2 [ h^2 \cdot a^{*2} \cdot U11 + \dots + 2 \cdot h \cdot k \cdot a^* \cdot b^* \cdot U12 ]$$

|        | U11    | U22    | U33    | U23    | U13    | U12    |
|--------|--------|--------|--------|--------|--------|--------|
| C1(1)  | 86(1)  | 54(1)  | 81(1)  | -11(1) | -48(1) | 13(1)  |
| C1(2)  | 74(1)  | 67(1)  | 53(1)  | -23(1) | -25(1) | -12(1) |
| N(1)   | 44(1)  | 47(1)  | 37(1)  | -12(1) | -14(1) | -3(1)  |
| N(2)   | 58(1)  | 57(1)  | 40(1)  | -14(1) | -21(1) | -3(1)  |
| N(10)  | 47(1)  | 44(1)  | 41(1)  | -7(1)  | -15(1) | -4(1)  |
| N(11)  | 64(1)  | 45(1)  | 61(1)  | -10(1) | -29(1) | 4(1)   |
| O(1)   | 69(1)  | 125(2) | 58(1)  | -48(1) | -11(1) | 12(1)  |
| O(2)   | 109(2) | 49(1)  | 119(2) | 6(1)   | -62(2) | -19(1) |
| C(2)   | 41(1)  | 51(1)  | 40(1)  | -12(1) | -9(1)  | -2(1)  |
| C(3)   | 49(1)  | 46(1)  | 52(2)  | -15(1) | -16(1) | 2(1)   |
| C(4)   | 45(1)  | 46(1)  | 50(1)  | -5(1)  | -18(1) | 1(1)   |
| C(4A)  | 39(1)  | 47(1)  | 41(1)  | -5(1)  | -13(1) | -4(1)  |
| C(5)   | 48(1)  | 57(2)  | 45(1)  | -6(1)  | -22(1) | -1(1)  |
| C(6)   | 47(1)  | 59(2)  | 40(1)  | -10(1) | -18(1) | -7(1)  |
| C(6A)  | 40(1)  | 50(1)  | 37(1)  | -10(1) | -10(1) | -8(1)  |
| C(7)   | 45(1)  | 53(1)  | 44(1)  | -14(1) | -11(1) | -14(1) |
| C(8)   | 53(1)  | 45(1)  | 52(2)  | -15(1) | -13(1) | -8(1)  |
| C(9)   | 48(1)  | 43(1)  | 48(1)  | -9(1)  | -14(1) | -5(1)  |
| C(10A) | 38(1)  | 46(1)  | 35(1)  | -7(1)  | -10(1) | -6(1)  |
| C(10B) | 38(1)  | 45(1)  | 33(1)  | -7(1)  | -9(1)  | -4(1)  |
| C(1)   | 55(1)  | 55(2)  | 40(1)  | -14(1) | -11(1) | -4(1)  |
| C(10)  | 67(2)  | 42(1)  | 58(2)  | -9(1)  | -24(1) | -2(1)  |
| C(11)  | 57(2)  | 75(2)  | 60(2)  | -21(1) | -25(1) | 5(1)   |
| C(12)  | 71(2)  | 125(3) | 99(3)  | -30(2) | -44(2) | 9(2)   |
| C(13)  | 95(2)  | 111(3) | 82(2)  | -9(2)  | -59(2) | -8(2)  |
| C(14)  | 90(2)  | 78(2)  | 46(2)  | -16(1) | -32(1) | -8(2)  |
| C(17)  | 84(2)  | 59(2)  | 74(2)  | -13(2) | -37(2) | 19(2)  |
| C(18)  | 92(2)  | 85(2)  | 121(3) | -48(2) | -63(2) | 33(2)  |
| C(191) | 53(7)  | 95(12) | 40(8)  | -23(6) | -10(6) | -5(7)  |
| C(192) | 57(3)  | 111(6) | 62(5)  | -17(4) | -12(3) | -21(3) |
| C(20)  | 69(2)  | 59(2)  | 86(2)  | -16(2) | -36(2) | -4(1)  |



**Table S13.** Hydrogen coordinates (  $\times 10^4$ ) and isotropic displacement parameters ( $\text{\AA}^2 \times 10^3$ ) for **3a**.

|        | x     | y    | z     | U(eq) |
|--------|-------|------|-------|-------|
| H(3)   | 2451  | 8807 | 7654  | 57    |
| H(5)   | 1262  | 6767 | 5073  | 58    |
| H(6)   | 1939  | 4703 | 4595  | 56    |
| H(8)   | 4920  | 743  | 5883  | 58    |
| H(11A) | 7636  | 7078 | 7840  | 74    |
| H(11B) | 7015  | 5594 | 8065  | 74    |
| H(12A) | 8610  | 4935 | 9228  | 112   |
| H(12B) | 9746  | 6149 | 8635  | 112   |
| H(13A) | 8675  | 7386 | 9807  | 108   |
| H(13B) | 8313  | 5987 | 10512 | 108   |
| H(14A) | 5418  | 6336 | 10655 | 81    |
| H(14B) | 5782  | 7856 | 10204 | 81    |
| H(17A) | 8841  | -483 | 8169  | 85    |
| H(17B) | 7613  | 17   | 9159  | 85    |
| H(181) | 11039 | 624  | 8280  | 110   |
| H(182) | 9922  | 920  | 9358  | 110   |
| H(183) | 9634  | 1317 | 9299  | 110   |
| H(184) | 10994 | 423  | 8582  | 110   |
| H(191) | 9266  | 3137 | 8712  | 73    |
| H(192) | 10754 | 2909 | 7723  | 73    |
| H(193) | 10933 | 1847 | 7237  | 90    |
| H(194) | 10616 | 2836 | 8048  | 90    |
| H(201) | 8844  | 2758 | 6881  | 81    |
| H(202) | 7416  | 3311 | 7770  | 81    |
| H(203) | 7679  | 3230 | 8046  | 81    |
| H(204) | 8417  | 2982 | 6896  | 81    |

**Table S14.** Torsion angles [°] for **3a**.

---

|                                 |            |                                  |            |
|---------------------------------|------------|----------------------------------|------------|
| C (10B) -N (1) -C (2) -C (3)    | -1.2 (3)   | C (6A) -C (10A) -C (10B) -N (1)  | 179.6 (2)  |
| C (10B) -N (1) -C (2) -C (1)    | 172.4 (2)  | N (10) -C (10A) -C (10B) -C (4A) | 179.1 (2)  |
| N (1) -C (2) -C (3) -C (4)      | 0.5 (4)    | C (6A) -C (10A) -C (10B) -C (4A) | -0.7 (3)   |
| C (1) -C (2) -C (3) -C (4)      | -173.1 (2) | C (11) -N (2) -C (1) -O (1)      | -170.1 (3) |
| C (2) -C (3) -C (4) -C (4A)     | 1.2 (4)    | C (14) -N (2) -C (1) -O (1)      | -0.4 (4)   |
| C (2) -C (3) -C (4) -Cl (1)     | -178.6 (2) | C (11) -N (2) -C (1) -C (2)      | 11.5 (4)   |
| C (3) -C (4) -C (4A) -C (10B)   | -2.0 (3)   | C (14) -N (2) -C (1) -C (2)      | -178.8 (2) |
| Cl (1) -C (4) -C (4A) -C (10B)  | 177.8 (2)  | N (1) -C (2) -C (1) -O (1)       | -128.5 (3) |
| C (3) -C (4) -C (4A) -C (5)     | 179.0 (2)  | C (3) -C (2) -C (1) -O (1)       | 45.4 (3)   |
| Cl (1) -C (4) -C (4A) -C (5)    | -1.2 (3)   | N (1) -C (2) -C (1) -N (2)       | 49.9 (3)   |
| C (4) -C (4A) -C (5) -C (6)     | 178.2 (2)  | C (3) -C (2) -C (1) -N (2)       | -136.1 (2) |
| C (10B) -C (4A) -C (5) -C (6)   | -0.7 (4)   | C (20) -N (11) -C (10) -O (2)    | 170.2 (3)  |
| C (4A) -C (5) -C (6) -C (6A)    | 0.7 (4)    | C (17) -N (11) -C (10) -O (2)    | -1.9 (4)   |
| C (5) -C (6) -C (6A) -C (7)     | 179.2 (2)  | C (20) -N (11) -C (10) -C (9)    | -9.7 (4)   |
| C (5) -C (6) -C (6A) -C (10A)   | -0.7 (3)   | C (17) -N (11) -C (10) -C (9)    | 178.2 (2)  |
| C (10A) -C (6A) -C (7) -C (8)   | 0.5 (3)    | N (10) -C (9) -C (10) -O (2)     | 141.1 (3)  |
| C (6) -C (6A) -C (7) -C (8)     | -179.4 (2) | C (8) -C (9) -C (10) -O (2)      | -35.4 (4)  |
| C (10A) -C (6A) -C (7) -Cl (2)  | -180.0 (2) | N (10) -C (9) -C (10) -N (11)    | -39.1 (3)  |
| C (6) -C (6A) -C (7) -Cl (2)    | 0.1 (3)    | C (8) -C (9) -C (10) -N (11)     | 144.5 (2)  |
| C (6A) -C (7) -C (8) -C (9)     | -1.8 (3)   | C (1) -N (2) -C (11) -C (12)     | -174.7 (3) |
| Cl (2) -C (7) -C (8) -C (9)     | 178.6 (2)  | C (14) -N (2) -C (11) -C (12)    | 14.8 (3)   |
| C (10A) -N (10) -C (9) -C (8)   | -0.5 (3)   | N (2) -C (11) -C (12) -C (13)    | -23.5 (4)  |
| C (10A) -N (10) -C (9) -C (10)  | -176.7 (2) | C (11) -C (12) -C (13) -C (14)   | 23.9 (4)   |
| C (7) -C (8) -C (9) -N (10)     | 1.9 (4)    | C (1) -N (2) -C (14) -C (13)     | -172.1 (3) |
| C (7) -C (8) -C (9) -C (10)     | 178.1 (2)  | C (11) -N (2) -C (14) -C (13)    | -0.9 (3)   |
| C (9) -N (10) -C (10A) -C (6A)  | -1.0 (3)   | C (12) -C (13) -C (14) -N (2)    | -14.1 (4)  |
| C (9) -N (10) -C (10A) -C (10B) | 179.2 (2)  | C (10) -N (11) -C (17) -C (18)   | 172.1 (3)  |
| C (7) -C (6A) -C (10A) -N (10)  | 1.0 (3)    | C (20) -N (11) -C (17) -C (18)   | -1.3 (3)   |
| C (6) -C (6A) -C (10A) -N (10)  | -179.1 (2) | N (11) -C (17) -C (18) -C (192)  | -18.7 (7)  |
| C (7) -C (6A) -C (10A) -C (10B) | -179.3 (2) | N (11) -C (17) -C (18) -C (191)  | 8.7 (10)   |
| C (6) -C (6A) -C (10A) -C (10B) | 0.6 (3)    | C (17) -C (18) -C (191) -C (20)  | -12.9 (15) |
| C (2) -N (1) -C (10B) -C (4A)   | 0.2 (3)    | C (17) -C (18) -C (192) -C (20)  | 31.9 (10)  |
| C (2) -N (1) -C (10B) -C (10A)  | 179.9 (2)  | C (18) -C (191) -C (20) -N (11)  | 12.3 (16)  |
| C (4) -C (4A) -C (10B) -N (1)   | 1.3 (3)    | C (10) -N (11) -C (20) -C (191)  | 179.6 (11) |
| C (5) -C (4A) -C (10B) -N (1)   | -179.6 (2) | C (17) -N (11) -C (20) -C (191)  | -7.7 (12)  |
| C (4) -C (4A) -C (10B) -C (10A) | -178.3 (2) | C (10) -N (11) -C (20) -C (192)  | -153.9 (5) |
| C (5) -C (4A) -C (10B) -C (10A) | 0.7 (3)    | C (17) -N (11) -C (20) -C (192)  | 18.8 (6)   |
| N (10) -C (10A) -C (10B) -N (1) | -0.6 (3)   | C (18) -C (192) -C (20) -N (11)  | -31.6 (9)  |

---

**Table S15.** Hydrogen bonds for **3a** [ $\text{\AA}$  and  $^\circ$ ].

| D-H...A                | d(D-H) | d(H...A) | d(D...A) | $\angle$ (DHA) |
|------------------------|--------|----------|----------|----------------|
| C(11)-H(11B)...N(1)    | 0.97   | 2.50     | 3.041(3) | 115.5          |
| C(18)-H(183)...O(1)#1  | 0.97   | 2.44     | 3.243(5) | 140.1          |
| C(191)-H(191)...O(1)#1 | 0.97   | 2.57     | 3.22(2)  | 124.0          |
| C(20)-H(202)...N(10)   | 0.97   | 2.40     | 2.923(3) | 113.4          |

Symmetry transformations used to generate equivalent atoms:

#1  $-x+1, -y+1, -z+2$

**1,10-phenantroline-4,7-dichloro-2,9-diylbis(piperidin-1-yl-methanone) 3b**

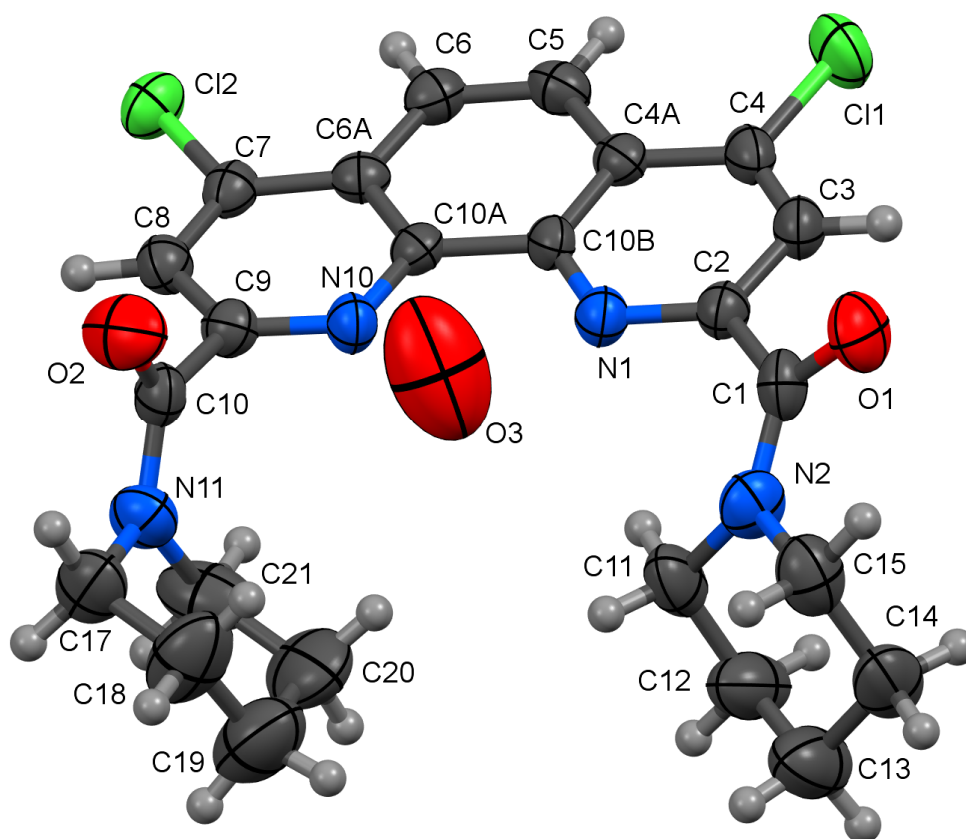

**Table S16.** Crystal data and structure refinement for **3b·H<sub>2</sub>O**.

|                                 |                                                                                                    |
|---------------------------------|----------------------------------------------------------------------------------------------------|
| Identification code             | 3b                                                                                                 |
| Empirical formula               | C <sub>24</sub> H <sub>26</sub> Cl <sub>2</sub> N <sub>4</sub> O <sub>3</sub>                      |
| Formula weight                  | 489.39                                                                                             |
| Temperature                     | 292 (2) K                                                                                          |
| Wavelength                      | 1.54186 Å                                                                                          |
| Crystal system, space group     | Monoclinic, C2/c                                                                                   |
| Unit cell dimensions            | a = 36.3267(15) Å    α = 90°<br>b = 6.8415(2) Å    β = 122.928(3)°<br>c = 22.1880(11) Å    γ = 90° |
| Volume                          | 4628.5(4) Å <sup>3</sup>                                                                           |
| Z, Calculated density           | 8, 1.405 Mg/m <sup>3</sup>                                                                         |
| Absorption coefficient          | 2.810 mm <sup>-1</sup>                                                                             |
| F(000)                          | 2048                                                                                               |
| Crystal size                    | 0.12 x 0.10 x 0.02 mm                                                                              |
| Theta range for data collection | 3.998 to 67.731°                                                                                   |
| Limiting indices                | -43<=h<=43, -4<=k<=8, -24<=l<=26                                                                   |
| Reflections collected / unique  | 26181 / 4179 [R(int) = 0.1129]                                                                     |
| Completeness to theta = 67.686° | 99.7 %                                                                                             |
| Absorption correction           | Semi-empirical from equivalents                                                                    |
| Max. and min. transmission      | 0.972 and 0.805                                                                                    |
| Refinement method               | Full-matrix least-squares on F <sup>2</sup>                                                        |
| Data / restraints / parameters  | 4179 / 0 / 298                                                                                     |

|                                      |                                    |
|--------------------------------------|------------------------------------|
| Goodness-of-fit on $F^2$             | 0.846                              |
| Final R indices [ $I > 2\sigma(I)$ ] | R1 = 0.0362, wR2 = 0.0591          |
| R indices (all data)                 | R1 = 0.0992, wR2 = 0.0721          |
| Extinction coefficient               | n/a                                |
| Largest diff. peak and hole          | 0.138 and -0.154 e/Å <sup>-3</sup> |

**Table S17.** Atomic coordinates (  $\times 10^4$ ) and equivalent isotropic displacement parameters ( $\text{\AA}^2 \times 10^3$ ) for **3b·H<sub>2</sub>O**. U(eq) is defined as one third of the trace of the orthogonalized  $U_{ij}$  tensor.

|        | x       | y        | z       | U(eq)  |
|--------|---------|----------|---------|--------|
| C1(1)  | 1863(1) | 5596(1)  | 3851(1) | 67(1)  |
| C1(2)  | 2220(1) | 5750(1)  | 814(1)  | 52(1)  |
| O(1)   | 3520(1) | 4399(3)  | 5939(1) | 64(1)  |
| O(2)   | 3944(1) | 3082(3)  | 2818(1) | 78(1)  |
| O(3)   | 4013(1) | 3332(5)  | 4453(2) | 161(1) |
| N(1)   | 3216(1) | 5624(3)  | 4235(1) | 42(1)  |
| N(10)  | 3340(1) | 5415(3)  | 3138(1) | 41(1)  |
| N(2)   | 3895(1) | 6663(3)  | 5735(1) | 55(1)  |
| N(11)  | 4157(1) | 6245(3)  | 3013(1) | 56(1)  |
| C(2)   | 3155(1) | 5658(3)  | 4770(1) | 40(1)  |
| C(3)   | 2740(1) | 5624(3)  | 4668(1) | 45(1)  |
| C(4)   | 2382(1) | 5642(3)  | 3999(1) | 45(1)  |
| C(4A)  | 2422(1) | 5677(3)  | 3397(1) | 38(1)  |
| C(5)   | 2059(1) | 5764(3)  | 2662(1) | 45(1)  |
| C(6)   | 2122(1) | 5767(3)  | 2114(1) | 43(1)  |
| C(6A)  | 2558(1) | 5669(3)  | 2256(1) | 37(1)  |
| C(7)   | 2644(1) | 5648(3)  | 1705(1) | 40(1)  |
| C(8)   | 3066(1) | 5485(3)  | 1878(1) | 43(1)  |
| C(9)   | 3399(1) | 5352(3)  | 2600(1) | 42(1)  |
| C(10A) | 2921(1) | 5589(3)  | 2967(1) | 38(1)  |
| C(10B) | 2857(1) | 5628(3)  | 3561(1) | 37(1)  |
| C(1)   | 3541(1) | 5553(4)  | 5524(1) | 47(1)  |
| C(11)  | 3937(1) | 8236(4)  | 5326(1) | 65(1)  |
| C(12)  | 4011(1) | 10199(5) | 5686(2) | 82(1)  |
| C(13)  | 4399(1) | 10116(5) | 6451(2) | 94(1)  |
| C(14)  | 4349(1) | 8469(5)  | 6860(1) | 76(1)  |
| C(15)  | 4270(1) | 6515(4)  | 6470(1) | 68(1)  |
| C(10)  | 3864(1) | 4818(4)  | 2821(1) | 44(1)  |
| C(17)  | 4617(1) | 5771(5)  | 3312(1) | 70(1)  |
| C(18)  | 4884(1) | 6081(5)  | 4100(2) | 96(1)  |
| C(19)  | 4833(1) | 8106(6)  | 4294(2) | 107(1) |
| C(20)  | 4355(1) | 8625(5)  | 3961(2) | 101(1) |
| C(21)  | 4094(1) | 8239(4)  | 3163(2) | 84(1)  |

**Table S18.** Bond lengths [Å] and angles [°] for **3b·H<sub>2</sub>O**.

|                      |           |                        |           |
|----------------------|-----------|------------------------|-----------|
| C1 (1)-C (4)         | 1.729 (2) | C (4A)-C (10B)         | 1.415 (3) |
| C1 (2)-C (7)         | 1.724 (2) | C (4A)-C (5)           | 1.436 (3) |
| O (1)-C (1)          | 1.245 (3) | C (5)-C (6)            | 1.356 (3) |
| O (2)-C (10)         | 1.222 (3) | C (6)-C (6A)           | 1.439 (3) |
| N (1)-C (2)          | 1.321 (3) | C (6A)-C (10A)         | 1.403 (3) |
| N (1)-C (10B)        | 1.348 (3) | C (6A)-C (7)           | 1.417 (3) |
| N (10)-C (9)         | 1.325 (3) | C (7)-C (8)            | 1.368 (3) |
| N (10)-C (10A)       | 1.359 (3) | C (8)-C (9)            | 1.391 (3) |
| N (2)-C (1)          | 1.341 (3) | C (9)-C (10)           | 1.526 (3) |
| N (2)-C (15)         | 1.453 (3) | C (10A)-C (10B)        | 1.458 (3) |
| N (2)-C (11)         | 1.468 (3) | C (11)-C (12)          | 1.510 (4) |
| N (11)-C (10)        | 1.332 (3) | C (12)-C (13)          | 1.508 (4) |
| N (11)-C (21)        | 1.452 (3) | C (13)-C (14)          | 1.518 (4) |
| N (11)-C (17)        | 1.460 (3) | C (14)-C (15)          | 1.532 (4) |
| C (2)-C (3)          | 1.398 (3) | C (17)-C (18)          | 1.483 (4) |
| C (2)-C (1)          | 1.489 (3) | C (18)-C (19)          | 1.492 (4) |
| C (3)-C (4)          | 1.340 (3) | C (19)-C (20)          | 1.514 (5) |
| C (4)-C (4A)         | 1.421 (3) | C (20)-C (21)          | 1.511 (4) |
| <hr/>                |           |                        |           |
| C (2)-N (1)-C (10B)  | 117.6 (2) | C (7)-C (8)-C (9)      | 118.0 (2) |
| C (9)-N (10)-C (10A) | 117.3 (2) | N (10)-C (9)-C (8)     | 124.7 (2) |
| C (1)-N (2)-C (15)   | 119.3 (2) | N (10)-C (9)-C (10)    | 114.5 (2) |
| C (1)-N (2)-C (11)   | 127.0 (2) | C (8)-C (9)-C (10)     | 120.3 (2) |
| C (15)-N (2)-C (11)  | 113.3 (2) | N (10)-C (10A)-C (6A)  | 122.8 (2) |
| C (10)-N (11)-C (21) | 124.3 (2) | N (10)-C (10A)-C (10B) | 117.1 (2) |
| C (10)-N (11)-C (17) | 120.0 (2) | C (6A)-C (10A)-C (10B) | 120.1 (2) |
| C (21)-N (11)-C (17) | 112.9 (2) | N (1)-C (10B)-C (4A)   | 123.9 (2) |
| N (1)-C (2)-C (3)    | 123.1 (2) | N (1)-C (10B)-C (10A)  | 117.9 (2) |
| N (1)-C (2)-C (1)    | 119.6 (2) | C (4A)-C (10B)-C (10A) | 118.2 (2) |
| C (3)-C (2)-C (1)    | 117.1 (2) | O (1)-C (1)-N (2)      | 122.2 (2) |
| C (4)-C (3)-C (2)    | 119.5 (2) | O (1)-C (1)-C (2)      | 117.5 (2) |
| C (3)-C (4)-C (4A)   | 120.5 (2) | N (2)-C (1)-C (2)      | 120.2 (2) |
| C (3)-C (4)-C1 (1)   | 120.8 (2) | N (2)-C (11)-C (12)    | 112.0 (2) |
| C (4A)-C (4)-C1 (1)  | 118.7 (2) | C (13)-C (12)-C (11)   | 110.6 (3) |
| C (10B)-C (4A)-C (4) | 115.4 (2) | C (12)-C (13)-C (14)   | 111.0 (2) |
| C (10B)-C (4A)-C (5) | 120.1 (2) | C (13)-C (14)-C (15)   | 110.9 (2) |
| C (4)-C (4A)-C (5)   | 124.6 (2) | N (2)-C (15)-C (14)    | 110.3 (2) |
| C (6)-C (5)-C (4A)   | 121.3 (2) | O (2)-C (10)-N (11)    | 124.4 (2) |
| C (5)-C (6)-C (6A)   | 120.5 (2) | O (2)-C (10)-C (9)     | 116.9 (2) |
| C (10A)-C (6A)-C (7) | 117.3 (2) | N (11)-C (10)-C (9)    | 118.7 (2) |
| C (10A)-C (6A)-C (6) | 119.8 (2) | N (11)-C (17)-C (18)   | 111.0 (2) |
| C (7)-C (6A)-C (6)   | 123.0 (2) | C (17)-C (18)-C (19)   | 111.7 (3) |
| C (8)-C (7)-C (6A)   | 119.8 (2) | C (18)-C (19)-C (20)   | 111.6 (3) |
| C (8)-C (7)-C1 (2)   | 119.4 (2) | C (21)-C (20)-C (19)   | 110.6 (3) |
| C (6A)-C (7)-C1 (2)  | 120.7 (2) | N (11)-C (21)-C (20)   | 110.9 (3) |

**Table S19.** Anisotropic displacement parameters ( $\text{\AA}^2 \times 10^3$ ) for **3b·H<sub>2</sub>O**. The anisotropic displacement factor exponent takes the form:  
 $-2 \cdot \pi^2 [ h^2 \cdot a^{*2} \cdot U_{11} + \dots + 2 \cdot h \cdot k \cdot a^* \cdot b^* \cdot U_{12} ]$

|        | U11    | U22    | U33    | U23    | U13   | U12    |
|--------|--------|--------|--------|--------|-------|--------|
| C1(1)  | 54(1)  | 92(1)  | 75(1)  | -4(1)  | 47(1) | -4(1)  |
| C1(2)  | 56(1)  | 56(1)  | 37(1)  | -2(1)  | 20(1) | 1(1)   |
| O(1)   | 74(1)  | 74(1)  | 49(1)  | 16(1)  | 38(1) | 5(1)   |
| O(2)   | 69(1)  | 58(1)  | 116(2) | -16(1) | 56(1) | 6(1)   |
| O(3)   | 130(2) | 223(3) | 141(2) | 85(2)  | 80(2) | 75(2)  |
| N(1)   | 44(1)  | 45(1)  | 39(1)  | -2(1)  | 25(1) | 1(1)   |
| N(10)  | 41(1)  | 47(1)  | 39(1)  | -3(1)  | 26(1) | 1(1)   |
| N(2)   | 47(1)  | 70(2)  | 37(1)  | 4(1)   | 15(1) | 2(1)   |
| N(11)  | 41(1)  | 65(2)  | 63(2)  | -6(1)  | 28(1) | -2(1)  |
| C(2)   | 44(1)  | 41(1)  | 36(1)  | -1(1)  | 24(1) | -1(1)  |
| C(3)   | 54(2)  | 49(2)  | 43(2)  | -3(1)  | 32(1) | -1(1)  |
| C(4)   | 56(2)  | 41(1)  | 55(2)  | -7(1)  | 41(1) | -5(1)  |
| C(4A)  | 41(1)  | 33(1)  | 47(1)  | -6(1)  | 27(1) | -2(1)  |
| C(5)   | 39(1)  | 41(1)  | 57(2)  | 0(1)   | 28(1) | -2(1)  |
| C(6)   | 45(1)  | 38(1)  | 41(1)  | -2(1)  | 20(1) | -3(1)  |
| C(6A)  | 39(1)  | 30(1)  | 41(1)  | -1(1)  | 21(1) | -2(1)  |
| C(7)   | 51(1)  | 32(1)  | 38(1)  | 0(1)   | 25(1) | 0(1)   |
| C(8)   | 49(2)  | 43(2)  | 44(2)  | 1(1)   | 29(1) | -1(1)  |
| C(9)   | 42(1)  | 41(1)  | 46(2)  | -3(1)  | 25(1) | 0(1)   |
| C(10A) | 41(1)  | 33(1)  | 40(1)  | -7(1)  | 23(1) | -4(1)  |
| C(10B) | 43(1)  | 36(1)  | 42(1)  | -7(1)  | 29(1) | -2(1)  |
| C(1)   | 56(2)  | 54(2)  | 40(1)  | 5(1)   | 32(1) | 8(1)   |
| C(11)  | 61(2)  | 92(2)  | 47(2)  | 7(2)   | 32(2) | -12(2) |
| C(12)  | 86(2)  | 87(2)  | 61(2)  | -3(2)  | 32(2) | -32(2) |
| C(13)  | 106(3) | 106(3) | 68(2)  | -6(2)  | 45(2) | -43(2) |
| C(14)  | 55(2)  | 119(3) | 44(2)  | -8(2)  | 20(2) | -19(2) |
| C(15)  | 58(2)  | 86(2)  | 59(2)  | 12(2)  | 32(2) | 9(1)   |
| C(10)  | 45(2)  | 52(2)  | 43(2)  | -4(1)  | 28(1) | 4(1)   |
| C(17)  | 45(2)  | 94(2)  | 72(2)  | -15(2) | 31(2) | 0(2)   |
| C(18)  | 63(2)  | 127(3) | 68(2)  | -23(2) | 17(2) | 10(2)  |
| C(19)  | 87(3)  | 121(3) | 94(3)  | -41(2) | 36(2) | -10(2) |
| C(20)  | 122(3) | 70(2)  | 130(3) | -40(2) | 81(3) | -14(2) |
| C(21)  | 69(2)  | 48(2)  | 137(3) | 7(2)   | 57(2) | 1(1)   |



**Table S20.** Hydrogen coordinates (  $\times 10^4$ ) and isotropic displacement parameters ( $\text{\AA}^2 \times 10^3$ ) for **3b·H<sub>2</sub>O**.

|        | x    | y     | z    | U(eq) |
|--------|------|-------|------|-------|
| H(3)   | 2712 | 5589  | 5061 | 54    |
| H(5)   | 1774 | 5820  | 2561 | 53    |
| H(6)   | 1882 | 5834  | 1643 | 52    |
| H(8)   | 3128 | 5464  | 1522 | 52    |
| H(111) | 3672 | 8292  | 4848 | 78    |
| H(112) | 4180 | 7949  | 5275 | 78    |
| H(121) | 4063 | 11178 | 5423 | 98    |
| H(122) | 3751 | 10575 | 5678 | 98    |
| H(131) | 4426 | 11350 | 6687 | 113   |
| H(132) | 4665 | 9917  | 6456 | 113   |
| H(141) | 4104 | 8749  | 6907 | 91    |
| H(142) | 4612 | 8379  | 7338 | 91    |
| H(151) | 4529 | 6159  | 6470 | 81    |
| H(152) | 4217 | 5501  | 6719 | 81    |
| H(171) | 4729 | 6588  | 3089 | 85    |
| H(172) | 4641 | 4418  | 3208 | 85    |
| H(181) | 5191 | 5847  | 4281 | 115   |
| H(182) | 4795 | 5150  | 4328 | 115   |
| H(191) | 4964 | 9026  | 4131 | 129   |
| H(192) | 4987 | 8214  | 4813 | 129   |
| H(201) | 4236 | 7855  | 4184 | 121   |
| H(202) | 4330 | 9995  | 4048 | 121   |
| H(211) | 3785 | 8462  | 2966 | 101   |
| H(212) | 4187 | 9140  | 2932 | 101   |

**Table S21.** Torsion angles [°] for **3b·H<sub>2</sub>O**.

---

|                          |           |                           |           |
|--------------------------|-----------|---------------------------|-----------|
| C(10B)-N(1)-C(2)-C(3)    | 2.4(3)    | N(10)-C(10A)-C(10B)-N(1)  | 4.5(3)    |
| C(10B)-N(1)-C(2)-C(1)    | 176.9(2)  | C(6A)-C(10A)-C(10B)-N(1)  | -177.5(2) |
| N(1)-C(2)-C(3)-C(4)      | -2.9(4)   | N(10)-C(10A)-C(10B)-C(4A) | -175.9(2) |
| C(1)-C(2)-C(3)-C(4)      | -177.6(2) | C(6A)-C(10A)-C(10B)-C(4A) | 2.2(3)    |
| C(2)-C(3)-C(4)-C(4A)     | 0.6(4)    | C(15)-N(2)-C(1)-O(1)      | 0.4(4)    |
| C(2)-C(3)-C(4)-Cl(1)     | 179.9(2)  | C(11)-N(2)-C(1)-O(1)      | -171.8(2) |
| C(3)-C(4)-C(4A)-C(10B)   | 1.9(3)    | C(15)-N(2)-C(1)-C(2)      | -179.1(2) |
| Cl(1)-C(4)-C(4A)-C(10B)  | -177.4(2) | C(11)-N(2)-C(1)-C(2)      | 8.7(4)    |
| C(3)-C(4)-C(4A)-C(5)     | -177.8(2) | N(1)-C(2)-C(1)-O(1)       | -133.6(2) |
| Cl(1)-C(4)-C(4A)-C(5)    | 2.9(3)    | C(3)-C(2)-C(1)-O(1)       | 41.2(3)   |
| C(10B)-C(4A)-C(5)-C(6)   | 1.2(3)    | N(1)-C(2)-C(1)-N(2)       | 45.9(3)   |
| C(4)-C(4A)-C(5)-C(6)     | -179.1(2) | C(3)-C(2)-C(1)-N(2)       | -139.3(2) |
| C(4A)-C(5)-C(6)-C(6A)    | 0.4(3)    | C(1)-N(2)-C(11)-C(12)     | 116.0(3)  |
| C(5)-C(6)-C(6A)-C(10A)   | -0.6(3)   | C(15)-N(2)-C(11)-C(12)    | -56.5(3)  |
| C(5)-C(6)-C(6A)-C(7)     | 179.3(2)  | N(2)-C(11)-C(12)-C(13)    | 54.2(3)   |
| C(10A)-C(6A)-C(7)-C(8)   | 2.2(3)    | C(11)-C(12)-C(13)-C(14)   | -53.9(4)  |
| C(6)-C(6A)-C(7)-C(8)     | -177.8(2) | C(12)-C(13)-C(14)-C(15)   | 54.7(4)   |
| C(10A)-C(6A)-C(7)-Cl(2)  | -179.8(2) | C(1)-N(2)-C(15)-C(14)     | -116.9(3) |
| C(6)-C(6A)-C(7)-Cl(2)    | 0.3(3)    | C(11)-N(2)-C(15)-C(14)    | 56.3(3)   |
| C(6A)-C(7)-C(8)-C(9)     | -0.2(3)   | C(13)-C(14)-C(15)-N(2)    | -55.1(3)  |
| Cl(2)-C(7)-C(8)-C(9)     | -178.3(2) | C(21)-N(11)-C(10)-O(2)    | -166.3(3) |
| C(10A)-N(10)-C(9)-C(8)   | 1.2(3)    | C(17)-N(11)-C(10)-O(2)    | -6.5(4)   |
| C(10A)-N(10)-C(9)-C(10)  | -170.3(2) | C(21)-N(11)-C(10)-C(9)    | 12.4(4)   |
| C(7)-C(8)-C(9)-N(10)     | -1.6(4)   | C(17)-N(11)-C(10)-C(9)    | 172.3(2)  |
| C(7)-C(8)-C(9)-C(10)     | 169.4(2)  | N(10)-C(9)-C(10)-O(2)     | 90.1(3)   |
| C(9)-N(10)-C(10A)-C(6A)  | 1.0(3)    | C(8)-C(9)-C(10)-O(2)      | -81.8(3)  |
| C(9)-N(10)-C(10A)-C(10B) | 179.1(2)  | N(10)-C(9)-C(10)-N(11)    | -88.7(3)  |
| C(7)-C(6A)-C(10A)-N(10)  | -2.7(3)   | C(8)-C(9)-C(10)-N(11)     | 99.3(3)   |
| C(6)-C(6A)-C(10A)-N(10)  | 177.3(2)  | C(10)-N(11)-C(17)-C(18)   | -104.3(3) |
| C(7)-C(6A)-C(10A)-C(10B) | 179.3(2)  | C(21)-N(11)-C(17)-C(18)   | 57.7(3)   |
| C(6)-C(6A)-C(10A)-C(10B) | -0.7(3)   | N(11)-C(17)-C(18)-C(19)   | -54.9(4)  |
| C(2)-N(1)-C(10B)-C(4A)   | 0.4(3)    | C(17)-C(18)-C(19)-C(20)   | 53.2(4)   |
| C(2)-N(1)-C(10B)-C(10A)  | -179.9(2) | C(18)-C(19)-C(20)-C(21)   | -52.2(4)  |
| C(4)-C(4A)-C(10B)-N(1)   | -2.5(3)   | C(10)-N(11)-C(21)-C(20)   | 103.8(3)  |
| C(5)-C(4A)-C(10B)-N(1)   | 177.2(2)  | C(17)-N(11)-C(21)-C(20)   | -57.3(3)  |
| C(4)-C(4A)-C(10B)-C(10A) | 177.9(2)  | C(19)-C(20)-C(21)-N(11)   | 53.8(4)   |
| C(5)-C(4A)-C(10B)-C(10A) | -2.4(3)   |                           |           |

---

**Table S22.** Hydrogen bonds for **3b·H<sub>2</sub>O** [Å and °].

| D-H...A                | d(D-H) | d(H...A) | d(D...A) | <(DHA) |
|------------------------|--------|----------|----------|--------|
| C(8)-H(8)...O(1)#1     | 0.93   | 2.39     | 3.287(3) | 161.5  |
| C(11)-H(111)...N(1)    | 0.97   | 2.34     | 3.003(3) | 125.0  |
| C(12)-H(121)...O(3)#2  | 0.97   | 2.53     | 3.477(4) | 164.5  |
| C(14)-H(141)...Cl(1)#3 | 0.97   | 2.99     | 3.836(3) | 146.6  |

Symmetry transformations used to generate equivalent atoms:

#1  $x, -y+1, z-1/2$     #2  $x, y+1, z$     #3  $-x+1/2, -y+3/2, -z+1$

(4,7-dichloro-9-(2,3-dihydro-1*H*-indol-1-ylcarbonyl)-1,10-phenanthrolin-2-yl)(2,3-dihydro-1*H*-indol-1-yl)methanone **3f**

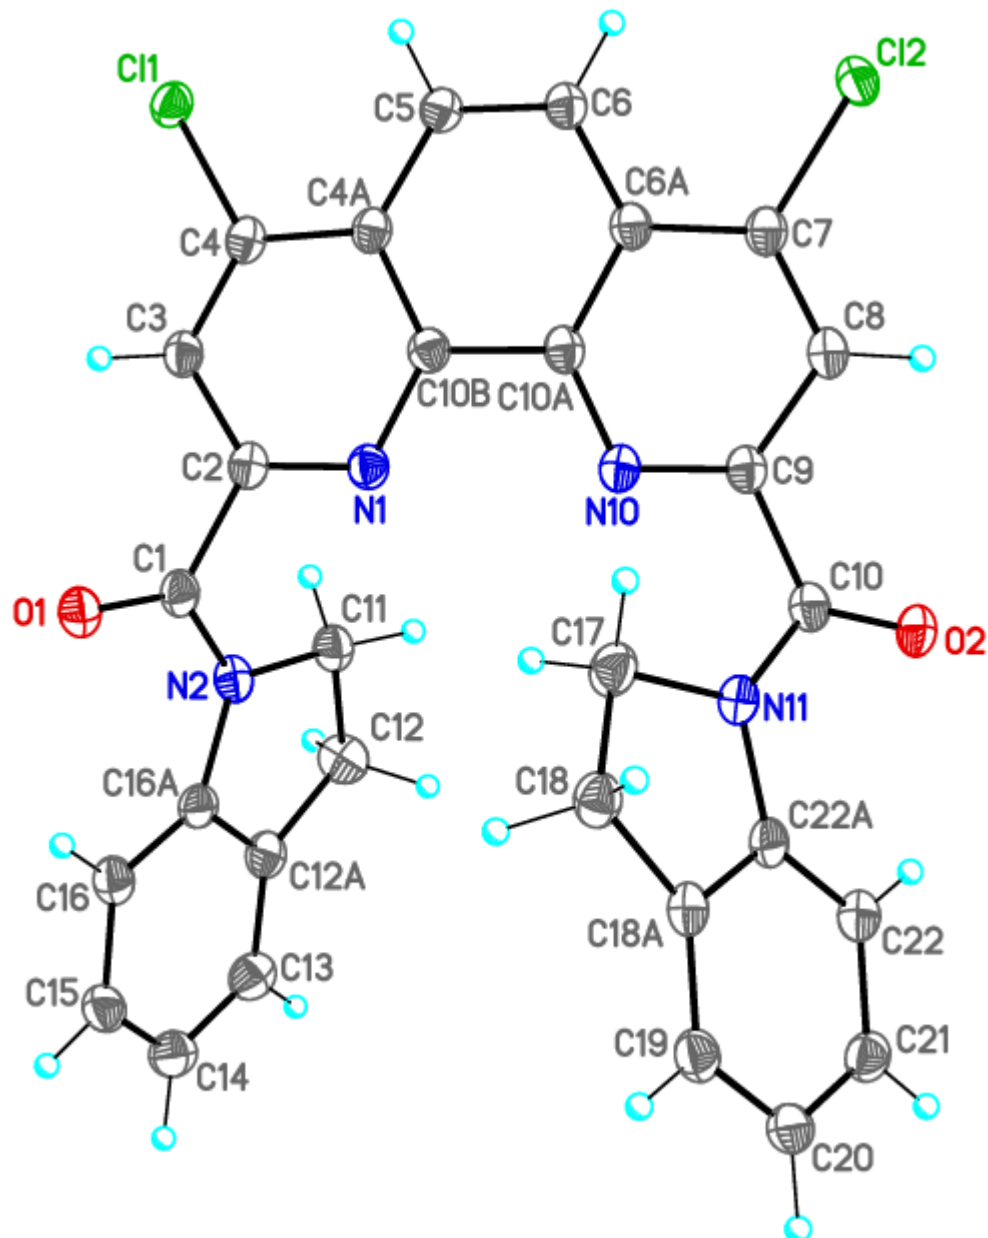

**Table S23.** Crystal data and structure refinement for **3f**.

|                      |                                                                               |                          |
|----------------------|-------------------------------------------------------------------------------|--------------------------|
| Identification code  | <b>3f</b>                                                                     |                          |
| Empirical formula    | C <sub>30</sub> H <sub>20</sub> Cl <sub>2</sub> N <sub>4</sub> O <sub>2</sub> |                          |
| Formula weight       | 539.40                                                                        |                          |
| Temperature          | 100(2) K                                                                      |                          |
| Wavelength           | 0.79272 Å                                                                     |                          |
| Crystal system       | Triclinic                                                                     |                          |
| Space group          | <i>P</i> -1                                                                   |                          |
| Unit cell dimensions | <i>a</i> = 7.2410(14) Å                                                       | <i>α</i> = 103.259(14)°. |
|                      | <i>b</i> = 11.680(2) Å                                                        | <i>β</i> = 95.030(2)°.   |
|                      | <i>c</i> = 14.506(3) Å                                                        | <i>γ</i> = 97.662(18)°.  |
| Volume               | 1174.6(4) Å <sup>3</sup>                                                      |                          |

|                                               |                                             |
|-----------------------------------------------|---------------------------------------------|
| Z                                             | 2                                           |
| Density (calculated)                          | 1.525 Mg/m <sup>3</sup>                     |
| Absorption coefficient                        | 0.420 mm <sup>-1</sup>                      |
| F(000)                                        | 556                                         |
| Crystal size                                  | 0.15 x 0.05 x 0.05 mm <sup>3</sup>          |
| Theta range for data collection               | 1.621 to 30.956°.                           |
| Index ranges                                  | -9<=h<=9, -15<=k<=15, -18<=l<=17            |
| Reflections collected                         | 18379                                       |
| Independent reflections                       | 5233 [R(int) = 0.0782]                      |
| Completeness to theta = 28.401°               | 97.9 %                                      |
| Absorption correction                         | Semi-empirical from equivalents             |
| Max. and min. transmission                    | 0.970 and 0.930                             |
| Refinement method                             | Full-matrix least-squares on F <sup>2</sup> |
| Data / restraints / parameters                | 5233 / 0 / 344                              |
| Goodness-of-fit on F <sup>2</sup>             | 1.021                                       |
| Final R indices [for 3967 rflns with I>2σ(I)] | R1 = 0.0593, wR2 = 0.1400                   |
| R indices (all data)                          | R1 = 0.0796, wR2 = 0.1531                   |
| Extinction coefficient                        | 0.0017(2)                                   |
| Largest diff. peak and hole                   | 0.556 and -0.591 e. Å <sup>-3</sup>         |

**Table S24.** Atomic coordinates ( $\times 10^4$ ) and equivalent isotropic displacement parameters ( $\text{\AA}^2 \times 10^3$ ) for **3f**.  
 $U(\text{eq})$  is defined as one third of the trace of the orthogonalized  $U^{ij}$  tensor.

| Atom   | x        | y        | z        | $U(\text{eq})$ |
|--------|----------|----------|----------|----------------|
| Cl(1)  | 8479(1)  | 1751(1)  | 4525(1)  | 28(1)          |
| Cl(2)  | 6572(1)  | 7792(1)  | 7018(1)  | 29(1)          |
| O(1)   | 10198(3) | 3311(2)  | 1305(1)  | 32(1)          |
| O(2)   | 4792(3)  | 9134(2)  | 3699(1)  | 30(1)          |
| N(1)   | 7817(3)  | 4637(2)  | 2970(2)  | 26(1)          |
| N(2)   | 7145(3)  | 3479(2)  | 892(2)   | 28(1)          |
| C(1)   | 8616(4)  | 3437(2)  | 1515(2)  | 26(1)          |
| C(2)   | 8271(3)  | 3601(2)  | 2546(2)  | 26(1)          |
| C(3)   | 8543(4)  | 2696(2)  | 3010(2)  | 26(1)          |
| C(4)   | 8290(3)  | 2888(2)  | 3948(2)  | 26(1)          |
| C(4A)  | 7872(3)  | 3989(2)  | 4459(2)  | 24(1)          |
| C(5)   | 7711(3)  | 4278(2)  | 5457(2)  | 26(1)          |
| C(6)   | 7339(3)  | 5365(2)  | 5908(2)  | 26(1)          |
| C(6A)  | 7090(3)  | 6245(2)  | 5385(2)  | 24(1)          |
| C(7)   | 6674(3)  | 7390(2)  | 5804(2)  | 25(1)          |
| C(8)   | 6371(3)  | 8185(2)  | 5264(2)  | 26(1)          |
| C(9)   | 6574(3)  | 7833(2)  | 4288(2)  | 25(1)          |
| N(10)  | 6993(3)  | 6789(2)  | 3859(2)  | 25(1)          |
| C(10A) | 7216(3)  | 5999(2)  | 4394(2)  | 25(1)          |
| C(10B) | 7652(3)  | 4835(2)  | 3914(2)  | 25(1)          |
| C(10)  | 6221(4)  | 8663(2)  | 3657(2)  | 25(1)          |
| N(11)  | 7509(3)  | 8814(2)  | 3055(2)  | 26(1)          |
| C(11)  | 5170(4)  | 3430(3)  | 1118(2)  | 31(1)          |
| C(12)  | 3971(4)  | 3276(3)  | 170(2)   | 37(1)          |
| C(12A) | 5367(4)  | 3439(2)  | -511(2)  | 30(1)          |
| C(13)  | 5087(4)  | 3531(2)  | -1444(2) | 33(1)          |
| C(14)  | 6624(4)  | 3704(2)  | -1935(2) | 35(1)          |
| C(15)  | 8424(4)  | 3780(2)  | -1488(2) | 33(1)          |
| C(16)  | 8742(4)  | 3668(2)  | -555(2)  | 31(1)          |
| C(16A) | 7194(4)  | 3513(2)  | -75(2)   | 27(1)          |
| C(17)  | 9368(4)  | 8404(3)  | 3084(2)  | 32(1)          |
| C(18)  | 10530(4) | 9148(2)  | 2526(2)  | 30(1)          |
| C(18A) | 9052(4)  | 9594(2)  | 1963(2)  | 27(1)          |
| C(19)  | 9212(4)  | 10137(2) | 1216(2)  | 30(1)          |
| C(20)  | 7629(4)  | 10504(2) | 827(2)   | 31(1)          |
| C(21)  | 5934(4)  | 10328(2) | 1189(2)  | 30(1)          |
| C(22)  | 5750(4)  | 9786(2)  | 1939(2)  | 28(1)          |
| C(22A) | 7334(4)  | 9414(2)  | 2317(2)  | 26(1)          |

**Table S25.** Bond lengths [ $\text{\AA}$ ] and angles [ $^\circ$ ] for **3f**.

|               |          |               |          |
|---------------|----------|---------------|----------|
| Cl(1)-C(4)    | 1.738(3) | C(11)-C(12)   | 1.522(4) |
| Cl(2)-C(7)    | 1.726(3) | C(11)-H(11A)  | 0.9900   |
| O(1)-C(1)     | 1.230(3) | C(11)-H(11B)  | 0.9900   |
| O(2)-C(10)    | 1.235(3) | C(12)-C(12A)  | 1.498(4) |
| N(1)-C(2)     | 1.323(3) | C(12)-H(12A)  | 0.9900   |
| N(1)-C(10B)   | 1.354(3) | C(12)-H(12B)  | 0.9900   |
| N(2)-C(1)     | 1.349(4) | C(12A)-C(13)  | 1.381(4) |
| N(2)-C(16A)   | 1.416(4) | C(12A)-C(16A) | 1.399(4) |
| N(2)-C(11)    | 1.492(3) | C(13)-C(14)   | 1.390(4) |
| C(1)-C(2)     | 1.510(4) | C(13)-H(13)   | 0.9500   |
| C(2)-C(3)     | 1.402(4) | C(14)-C(15)   | 1.386(4) |
| C(3)-C(4)     | 1.360(4) | C(14)-H(14)   | 0.9500   |
| C(3)-H(3)     | 0.9500   | C(15)-C(16)   | 1.392(4) |
| C(4)-C(4A)    | 1.415(3) | C(15)-H(15)   | 0.9500   |
| C(4A)-C(10B)  | 1.416(4) | C(16)-C(16A)  | 1.383(4) |
| C(4A)-C(5)    | 1.428(4) | C(16)-H(16)   | 0.9500   |
| C(5)-C(6)     | 1.362(4) | C(17)-C(18)   | 1.537(4) |
| C(5)-H(5)     | 0.9500   | C(17)-H(17A)  | 0.9900   |
| C(6)-C(6A)    | 1.431(4) | C(17)-H(17B)  | 0.9900   |
| C(6)-H(6)     | 0.9500   | C(18)-C(18A)  | 1.508(4) |
| C(6A)-C(10A)  | 1.414(4) | C(18)-H(18A)  | 0.9900   |
| C(6A)-C(7)    | 1.419(3) | C(18)-H(18B)  | 0.9900   |
| C(7)-C(8)     | 1.372(4) | C(18A)-C(19)  | 1.381(4) |
| C(8)-C(9)     | 1.408(4) | C(18A)-C(22A) | 1.395(4) |
| C(8)-H(8)     | 0.9500   | C(19)-C(20)   | 1.395(4) |
| C(9)-N(10)    | 1.322(3) | C(19)-H(19)   | 0.9500   |
| C(9)-C(10)    | 1.508(4) | C(20)-C(21)   | 1.385(4) |
| N(10)-C(10A)  | 1.352(3) | C(20)-H(20)   | 0.9500   |
| C(10A)-C(10B) | 1.466(3) | C(21)-C(22)   | 1.386(4) |
| C(10)-N(11)   | 1.354(3) | C(21)-H(21)   | 0.9500   |
| N(11)-C(22A)  | 1.414(3) | C(22)-C(22A)  | 1.392(4) |
| N(11)-C(17)   | 1.488(3) | C(22)-H(22)   | 0.9500   |

|                     |            |
|---------------------|------------|
| C(2)-N(1)-C(10B)    | 117.4(2)   |
| C(1)-N(2)-C(16A)    | 126.4(2)   |
| C(1)-N(2)-C(11)     | 124.0(2)   |
| C(16A)-N(2)-C(11)   | 109.5(2)   |
| O(1)-C(1)-N(2)      | 124.7(3)   |
| O(1)-C(1)-C(2)      | 118.9(2)   |
| N(2)-C(1)-C(2)      | 116.4(2)   |
| N(1)-C(2)-C(3)      | 124.0(2)   |
| N(1)-C(2)-C(1)      | 116.7(2)   |
| C(3)-C(2)-C(1)      | 119.3(2)   |
| C(4)-C(3)-C(2)      | 117.9(2)   |
| C(4)-C(3)-H(3)      | 121.0      |
| C(2)-C(3)-H(3)      | 121.0      |
| C(3)-C(4)-C(4A)     | 121.3(2)   |
| C(3)-C(4)-Cl(1)     | 119.10(19) |
| C(4A)-C(4)-Cl(1)    | 119.5(2)   |
| C(4)-C(4A)-C(10B)   | 115.3(2)   |
| C(4)-C(4A)-C(5)     | 124.3(2)   |
| C(10B)-C(4A)-C(5)   | 120.5(2)   |
| C(6)-C(5)-C(4A)     | 121.2(2)   |
| C(6)-C(5)-H(5)      | 119.4      |
| C(4A)-C(5)-H(5)     | 119.4      |
| C(5)-C(6)-C(6A)     | 120.3(2)   |
| C(5)-C(6)-H(6)      | 119.9      |
| C(6A)-C(6)-H(6)     | 119.9      |
| C(10A)-C(6A)-C(7)   | 115.9(2)   |
| C(10A)-C(6A)-C(6)   | 120.7(2)   |
| C(7)-C(6A)-C(6)     | 123.4(2)   |
| C(8)-C(7)-C(6A)     | 121.2(2)   |
| C(8)-C(7)-Cl(2)     | 119.5(2)   |
| C(6A)-C(7)-Cl(2)    | 119.3(2)   |
| C(7)-C(8)-C(9)      | 117.0(2)   |
| C(7)-C(8)-H(8)      | 121.5      |
| C(9)-C(8)-H(8)      | 121.5      |
| N(10)-C(9)-C(8)     | 124.7(2)   |
| N(10)-C(9)-C(10)    | 116.1(2)   |
| C(8)-C(9)-C(10)     | 119.2(2)   |
| C(9)-N(10)-C(10A)   | 117.6(2)   |
| N(10)-C(10A)-C(6A)  | 123.6(2)   |
| N(10)-C(10A)-C(10B) | 117.5(2)   |
| C(6A)-C(10A)-C(10B) | 118.9(2)   |
| N(1)-C(10B)-C(4A)   | 123.9(2)   |



|                     |          |
|---------------------|----------|
| N(1)-C(10B)-C(10A)  | 117.6(2) |
| C(4A)-C(10B)-C(10A) | 118.5(2) |
| O(2)-C(10)-N(11)    | 124.3(2) |
| O(2)-C(10)-C(9)     | 119.4(2) |
| N(11)-C(10)-C(9)    | 116.3(2) |
| C(10)-N(11)-C(22A)  | 125.7(2) |
| C(10)-N(11)-C(17)   | 125.3(2) |
| C(22A)-N(11)-C(17)  | 108.9(2) |
| N(2)-C(11)-C(12)    | 105.5(2) |
| N(2)-C(11)-H(11A)   | 110.6    |
| C(12)-C(11)-H(11A)  | 110.6    |
| N(2)-C(11)-H(11B)   | 110.6    |
| C(12)-C(11)-H(11B)  | 110.6    |
| H(11A)-C(11)-H(11B) | 108.8    |
| C(12A)-C(12)-C(11)  | 104.2(2) |
| C(12A)-C(12)-H(12A) | 110.9    |
| C(11)-C(12)-H(12A)  | 110.9    |
| C(12A)-C(12)-H(12B) | 110.9    |
| C(11)-C(12)-H(12B)  | 110.9    |
| H(12A)-C(12)-H(12B) | 108.9    |
| C(13)-C(12A)-C(16A) | 119.5(3) |
| C(13)-C(12A)-C(12)  | 130.0(3) |
| C(16A)-C(12A)-C(12) | 110.5(2) |
| C(12A)-C(13)-C(14)  | 119.6(3) |
| C(12A)-C(13)-H(13)  | 120.2    |
| C(14)-C(13)-H(13)   | 120.2    |
| C(15)-C(14)-C(13)   | 119.9(3) |
| C(15)-C(14)-H(14)   | 120.0    |
| C(13)-C(14)-H(14)   | 120.0    |
| C(14)-C(15)-C(16)   | 121.6(3) |
| C(14)-C(15)-H(15)   | 119.2    |
| C(16)-C(15)-H(15)   | 119.2    |
| C(16A)-C(16)-C(15)  | 117.5(3) |
| C(16A)-C(16)-H(16)  | 121.2    |
| C(15)-C(16)-H(16)   | 121.2    |
| C(16)-C(16A)-C(12A) | 121.8(3) |
| C(16)-C(16A)-N(2)   | 128.6(3) |
| C(12A)-C(16A)-N(2)  | 109.5(2) |
| N(11)-C(17)-C(18)   | 104.6(2) |
| N(11)-C(17)-H(17A)  | 110.8    |
| C(18)-C(17)-H(17A)  | 110.8    |
| N(11)-C(17)-H(17B)  | 110.8    |

|                     |          |
|---------------------|----------|
| C(18)-C(17)-H(17B)  | 110.8    |
| H(17A)-C(17)-H(17B) | 108.9    |
| C(18A)-C(18)-C(17)  | 103.0(2) |
| C(18A)-C(18)-H(18A) | 111.2    |
| C(17)-C(18)-H(18A)  | 111.2    |
| C(18A)-C(18)-H(18B) | 111.2    |
| C(17)-C(18)-H(18B)  | 111.2    |
| H(18A)-C(18)-H(18B) | 109.1    |
| C(19)-C(18A)-C(22A) | 120.4(2) |
| C(19)-C(18A)-C(18)  | 129.6(2) |
| C(22A)-C(18A)-C(18) | 110.0(2) |
| C(18A)-C(19)-C(20)  | 118.7(3) |
| C(18A)-C(19)-H(19)  | 120.6    |
| C(20)-C(19)-H(19)   | 120.6    |
| C(21)-C(20)-C(19)   | 120.3(3) |
| C(21)-C(20)-H(20)   | 119.8    |
| C(19)-C(20)-H(20)   | 119.8    |
| C(20)-C(21)-C(22)   | 121.7(3) |
| C(20)-C(21)-H(21)   | 119.2    |
| C(22)-C(21)-H(21)   | 119.2    |
| C(21)-C(22)-C(22A)  | 117.5(3) |
| C(21)-C(22)-H(22)   | 121.2    |
| C(22A)-C(22)-H(22)  | 121.2    |
| C(22)-C(22A)-C(18A) | 121.3(2) |
| C(22)-C(22A)-N(11)  | 128.8(2) |
| C(18A)-C(22A)-N(11) | 109.9(2) |

---

**Table S26.** Anisotropic displacement parameters ( $\text{\AA}^2 \times 10^3$ ) for **3f**. The anisotropic displacement factor exponent takes the form:  $-2\pi^2 [h^2 a^{*2}U^{11} + \dots + 2 h k a^* b^* U^{12}]$

| Atom   | U <sup>11</sup> | U <sup>22</sup> | U <sup>33</sup> | U <sup>23</sup> | U <sup>13</sup> | U <sup>12</sup> |
|--------|-----------------|-----------------|-----------------|-----------------|-----------------|-----------------|
| Cl(1)  | 32(1)           | 23(1)           | 31(1)           | 7(1)            | 3(1)            | 8(1)            |
| Cl(2)  | 33(1)           | 27(1)           | 26(1)           | 2(1)            | 7(1)            | 8(1)            |
| O(1)   | 31(1)           | 35(1)           | 33(1)           | 7(1)            | 7(1)            | 12(1)           |
| O(2)   | 28(1)           | 30(1)           | 35(1)           | 7(1)            | 7(1)            | 13(1)           |
| N(1)   | 26(1)           | 24(1)           | 25(1)           | 3(1)            | 2(1)            | 6(1)            |
| N(2)   | 27(1)           | 29(1)           | 30(1)           | 4(1)            | 7(1)            | 9(1)            |
| C(1)   | 29(1)           | 20(1)           | 30(1)           | 3(1)            | 6(1)            | 6(1)            |
| C(2)   | 24(1)           | 24(1)           | 29(1)           | 4(1)            | 3(1)            | 6(1)            |
| C(3)   | 27(1)           | 24(1)           | 28(1)           | 3(1)            | 3(1)            | 7(1)            |
| C(4)   | 22(1)           | 25(1)           | 31(2)           | 6(1)            | 3(1)            | 6(1)            |
| C(4A)  | 20(1)           | 23(1)           | 28(1)           | 4(1)            | 2(1)            | 4(1)            |
| C(5)   | 24(1)           | 26(1)           | 27(1)           | 6(1)            | 3(1)            | 5(1)            |
| C(6)   | 24(1)           | 26(1)           | 27(1)           | 5(1)            | 4(1)            | 6(1)            |
| C(6A)  | 21(1)           | 24(1)           | 27(1)           | 4(1)            | 3(1)            | 3(1)            |
| C(7)   | 22(1)           | 24(1)           | 29(1)           | 4(1)            | 3(1)            | 4(1)            |
| C(8)   | 24(1)           | 22(1)           | 29(1)           | 2(1)            | 5(1)            | 5(1)            |
| C(9)   | 22(1)           | 24(1)           | 27(1)           | 3(1)            | 3(1)            | 5(1)            |
| N(10)  | 24(1)           | 22(1)           | 28(1)           | 4(1)            | 2(1)            | 5(1)            |
| C(10A) | 21(1)           | 24(1)           | 27(1)           | 2(1)            | 3(1)            | 4(1)            |
| C(10B) | 21(1)           | 27(1)           | 26(1)           | 6(1)            | 3(1)            | 4(1)            |
| C(10)  | 24(1)           | 23(1)           | 26(1)           | 1(1)            | 3(1)            | 5(1)            |
| N(11)  | 26(1)           | 22(1)           | 29(1)           | 4(1)            | 4(1)            | 7(1)            |
| C(11)  | 27(1)           | 33(1)           | 33(2)           | 7(1)            | 7(1)            | 9(1)            |
| C(12)  | 30(1)           | 41(2)           | 36(2)           | 7(1)            | 1(1)            | 1(1)            |
| C(12A) | 34(1)           | 20(1)           | 32(2)           | 2(1)            | 4(1)            | 5(1)            |
| C(13)  | 37(2)           | 26(1)           | 34(2)           | 5(1)            | -2(1)           | 3(1)            |
| C(14)  | 49(2)           | 25(1)           | 29(2)           | 4(1)            | 3(1)            | 6(1)            |
| C(15)  | 42(2)           | 28(1)           | 31(2)           | 5(1)            | 12(1)           | 9(1)            |
| C(16)  | 33(1)           | 29(1)           | 31(2)           | 4(1)            | 6(1)            | 10(1)           |
| C(16A) | 36(1)           | 19(1)           | 26(1)           | 2(1)            | 3(1)            | 7(1)            |
| C(17)  | 26(1)           | 35(1)           | 40(2)           | 13(1)           | 7(1)            | 12(1)           |
| C(18)  | 25(1)           | 30(1)           | 37(2)           | 8(1)            | 7(1)            | 6(1)            |
| C(18A) | 27(1)           | 22(1)           | 30(1)           | 1(1)            | 5(1)            | 7(1)            |
| C(19)  | 33(1)           | 25(1)           | 30(2)           | 3(1)            | 8(1)            | 6(1)            |
| C(20)  | 42(2)           | 25(1)           | 26(1)           | 3(1)            | 6(1)            | 7(1)            |
| C(21)  | 35(1)           | 25(1)           | 29(2)           | 4(1)            | 1(1)            | 8(1)            |
| C(22)  | 27(1)           | 25(1)           | 30(1)           | 3(1)            | 3(1)            | 7(1)            |
| C(22A) | 29(1)           | 20(1)           | 27(1)           | 1(1)            | 5(1)            | 6(1)            |

**Table S27.** Hydrogen coordinates ( $\times 10^4$ ) and isotropic displacement parameters ( $\text{\AA}^2 \times 10^3$ ) for **3f**.

| Atom   | x     | y     | z     | U(iso) |
|--------|-------|-------|-------|--------|
| H(3)   | 8894  | 1972  | 2679  | 32     |
| H(5)   | 7867  | 3701  | 5812  | 31     |
| H(6)   | 7244  | 5540  | 6574  | 31     |
| H(8)   | 6040  | 8939  | 5537  | 31     |
| H(11A) | 5016  | 4174  | 1573  | 37     |
| H(11B) | 4814  | 2750  | 1402  | 37     |
| H(12A) | 3204  | 2473  | -34   | 44     |
| H(12B) | 3126  | 3881  | 215   | 44     |
| H(13)  | 3851  | 3476  | -1748 | 40     |
| H(14)  | 6441  | 3769  | -2577 | 42     |
| H(15)  | 9466  | 3913  | -1826 | 40     |
| H(16)  | 9976  | 3696  | -259  | 37     |
| H(17A) | 9237  | 7543  | 2777  | 39     |
| H(17B) | 9963  | 8551  | 3750  | 39     |
| H(18A) | 11396 | 9818  | 2964  | 36     |
| H(18B) | 11265 | 8651  | 2098  | 36     |
| H(19)  | 10379 | 10258 | 972   | 35     |
| H(20)  | 7713  | 10876 | 312   | 37     |
| H(21)  | 4871  | 10585 | 916   | 36     |
| H(22)  | 4585  | 9673  | 2187  | 34     |

**Table S28.** Torsion angles [°] for **3f**.

---

|                          |             |
|--------------------------|-------------|
| C(16A)-N(2)-C(1)-O(1)    | -7.1(4)     |
| C(11)-N(2)-C(1)-O(1)     | 169.5(2)    |
| C(16A)-N(2)-C(1)-C(2)    | 170.7(2)    |
| C(11)-N(2)-C(1)-C(2)     | -12.7(4)    |
| C(10B)-N(1)-C(2)-C(3)    | 1.6(4)      |
| C(10B)-N(1)-C(2)-C(1)    | -174.8(2)   |
| O(1)-C(1)-C(2)-N(1)      | 115.4(3)    |
| N(2)-C(1)-C(2)-N(1)      | -62.6(3)    |
| O(1)-C(1)-C(2)-C(3)      | -61.2(3)    |
| N(2)-C(1)-C(2)-C(3)      | 120.9(3)    |
| N(1)-C(2)-C(3)-C(4)      | 1.3(4)      |
| C(1)-C(2)-C(3)-C(4)      | 177.6(2)    |
| C(2)-C(3)-C(4)-C(4A)     | -3.6(4)     |
| C(2)-C(3)-C(4)-Cl(1)     | 176.23(19)  |
| C(3)-C(4)-C(4A)-C(10B)   | 2.9(4)      |
| Cl(1)-C(4)-C(4A)-C(10B)  | -176.89(18) |
| C(3)-C(4)-C(4A)-C(5)     | -175.7(2)   |
| Cl(1)-C(4)-C(4A)-C(5)    | 4.5(4)      |
| C(4)-C(4A)-C(5)-C(6)     | 178.8(2)    |
| C(10B)-C(4A)-C(5)-C(6)   | 0.2(4)      |
| C(4A)-C(5)-C(6)-C(6A)    | 0.3(4)      |
| C(5)-C(6)-C(6A)-C(10A)   | 0.3(4)      |
| C(5)-C(6)-C(6A)-C(7)     | 179.1(2)    |
| C(10A)-C(6A)-C(7)-C(8)   | 1.6(4)      |
| C(6)-C(6A)-C(7)-C(8)     | -177.3(2)   |
| C(10A)-C(6A)-C(7)-Cl(2)  | -177.78(18) |
| C(6)-C(6A)-C(7)-Cl(2)    | 3.4(3)      |
| C(6A)-C(7)-C(8)-C(9)     | -2.7(4)     |
| Cl(2)-C(7)-C(8)-C(9)     | 176.63(19)  |
| C(7)-C(8)-C(9)-N(10)     | 1.4(4)      |
| C(7)-C(8)-C(9)-C(10)     | 178.9(2)    |
| C(8)-C(9)-N(10)-C(10A)   | 1.1(4)      |
| C(10)-C(9)-N(10)-C(10A)  | -176.4(2)   |
| C(9)-N(10)-C(10A)-C(6A)  | -2.3(4)     |
| C(9)-N(10)-C(10A)-C(10B) | 179.1(2)    |
| C(7)-C(6A)-C(10A)-N(10)  | 1.1(4)      |
| C(6)-C(6A)-C(10A)-N(10)  | 179.9(2)    |
| C(7)-C(6A)-C(10A)-C(10B) | 179.6(2)    |
| C(6)-C(6A)-C(10A)-C(10B) | -1.5(4)     |
| C(2)-N(1)-C(10B)-C(4A)   | -2.3(4)     |

|                           |           |
|---------------------------|-----------|
| C(2)-N(1)-C(10B)-C(10A)   | 177.8(2)  |
| C(4)-C(4A)-C(10B)-N(1)    | 0.1(4)    |
| C(5)-C(4A)-C(10B)-N(1)    | 178.8(2)  |
| C(4)-C(4A)-C(10B)-C(10A)  | 180.0(2)  |
| C(5)-C(4A)-C(10B)-C(10A)  | -1.3(4)   |
| N(10)-C(10A)-C(10B)-N(1)  | 0.5(3)    |
| C(6A)-C(10A)-C(10B)-N(1)  | -178.2(2) |
| N(10)-C(10A)-C(10B)-C(4A) | -179.4(2) |
| C(6A)-C(10A)-C(10B)-C(4A) | 2.0(4)    |
| N(10)-C(9)-C(10)-O(2)     | 130.1(3)  |
| C(8)-C(9)-C(10)-O(2)      | -47.5(4)  |
| N(10)-C(9)-C(10)-N(11)    | -48.2(3)  |
| C(8)-C(9)-C(10)-N(11)     | 134.1(2)  |
| O(2)-C(10)-N(11)-C(22A)   | -7.5(4)   |
| C(9)-C(10)-N(11)-C(22A)   | 170.8(2)  |
| O(2)-C(10)-N(11)-C(17)    | 170.7(3)  |
| C(9)-C(10)-N(11)-C(17)    | -11.1(4)  |
| C(1)-N(2)-C(11)-C(12)     | -170.0(2) |
| C(16A)-N(2)-C(11)-C(12)   | 7.1(3)    |
| N(2)-C(11)-C(12)-C(12A)   | -8.6(3)   |
| C(11)-C(12)-C(12A)-C(13)  | -171.7(3) |
| C(11)-C(12)-C(12A)-C(16A) | 7.5(3)    |
| C(16A)-C(12A)-C(13)-C(14) | -0.4(4)   |
| C(12)-C(12A)-C(13)-C(14)  | 178.8(3)  |
| C(12A)-C(13)-C(14)-C(15)  | 0.1(4)    |
| C(13)-C(14)-C(15)-C(16)   | 1.1(4)    |
| C(14)-C(15)-C(16)-C(16A)  | -2.0(4)   |
| C(15)-C(16)-C(16A)-C(12A) | 1.7(4)    |
| C(15)-C(16)-C(16A)-N(2)   | -174.1(2) |
| C(13)-C(12A)-C(16A)-C(16) | -0.6(4)   |
| C(12)-C(12A)-C(16A)-C(16) | -179.9(2) |
| C(13)-C(12A)-C(16A)-N(2)  | 176.0(2)  |
| C(12)-C(12A)-C(16A)-N(2)  | -3.3(3)   |
| C(1)-N(2)-C(16A)-C(16)    | -9.3(4)   |
| C(11)-N(2)-C(16A)-C(16)   | 173.7(3)  |
| C(1)-N(2)-C(16A)-C(12A)   | 174.5(2)  |
| C(11)-N(2)-C(16A)-C(12A)  | -2.5(3)   |
| C(10)-N(11)-C(17)-C(18)   | -160.7(2) |
| C(22A)-N(11)-C(17)-C(18)  | 17.7(3)   |
| N(11)-C(17)-C(18)-C(18A)  | -18.4(3)  |
| C(17)-C(18)-C(18A)-C(19)  | -167.8(3) |
| C(17)-C(18)-C(18A)-C(22A) | 13.7(3)   |

|                           |           |
|---------------------------|-----------|
| C(22A)-C(18A)-C(19)-C(20) | 0.2(4)    |
| C(18)-C(18A)-C(19)-C(20)  | -178.1(3) |
| C(18A)-C(19)-C(20)-C(21)  | 0.2(4)    |
| C(19)-C(20)-C(21)-C(22)   | -0.2(4)   |
| C(20)-C(21)-C(22)-C(22A)  | -0.4(4)   |
| C(21)-C(22)-C(22A)-C(18A) | 0.9(4)    |
| C(21)-C(22)-C(22A)-N(11)  | -178.0(2) |
| C(19)-C(18A)-C(22A)-C(22) | -0.8(4)   |
| C(18)-C(18A)-C(22A)-C(22) | 177.8(2)  |
| C(19)-C(18A)-C(22A)-N(11) | 178.2(2)  |
| C(18)-C(18A)-C(22A)-N(11) | -3.1(3)   |
| C(10)-N(11)-C(22A)-C(22)  | -12.2(4)  |
| C(17)-N(11)-C(22A)-C(22)  | 169.4(3)  |
| C(10)-N(11)-C(22A)-C(18A) | 168.8(2)  |
| C(17)-N(11)-C(22A)-C(18A) | -9.5(3)   |

---

**Table S29.** Hydrogen bonds for **3f** [ $\text{\AA}$  and  $^\circ$ ].

| D-H...A                 | d(D-H) | d(H...A) | d(D...A) | $\angle$ (DHA) |
|-------------------------|--------|----------|----------|----------------|
| C(8)-H(8)...O(2) #1     | 0.95   | 2.45     | 3.397(3) | 177.7          |
| C(11)-H(11B)...Cl(2) #2 | 0.99   | 2.75     | 3.580(3) | 141.9          |
| C(16)-H(16)...O(1)      | 0.95   | 2.41     | 2.949(4) | 115.9          |
| C(17)-H(17B)...Cl(1) #3 | 0.99   | 2.77     | 3.729(3) | 163.4          |
| C(18)-H(18A)...Cl(2) #4 | 0.99   | 2.97     | 3.780(3) | 139.7          |
| C(22)-H(22)...O(2)      | 0.95   | 2.42     | 2.939(3) | 114.5          |

---

Symmetry transformations used to generate equivalent atoms:

#1  $-x+1, -y+2, -z+1$     #2  $-x+1, -y+1, -z+1$     #3  $-x+2, -y+1, -z+1$

#4  $-x+2, -y+2, -z+1$

**Table S30.** Selected bond lengths and angles in crystal structures of **1·DMF·H<sub>2</sub>O**, **3a**, **3b·H<sub>2</sub>O** and **3f**.

| Atoms                       | Bond (Å) / angle (°) | Atoms           | Angle (°) |
|-----------------------------|----------------------|-----------------|-----------|
| <b>1·DMF·H<sub>2</sub>O</b> |                      |                 |           |
| C11–O1                      | 1.218(2)             | N1–C2–C11–O1    | -4.3(2)   |
| C11–O2                      | 1.302(2)             | N1–C2–C11–O2    | 176.0(1)  |
| C12–O3                      | 1.211(2)             | N10–C9–C12–O4   | 8.52(2)   |
| C12–O4                      | 1.306(2)             | N10–C9–C12–O3   | -170.3(1) |
| <b>3a</b>                   |                      |                 |           |
| C1–O1                       | 1.220(3)             | C2–C1–N2–C11    | 11.5(3)   |
| C1–N2                       | 1.328(3)             | O1–C1–C2–C3     | 45.4(3)   |
| C10–O2                      | 1.223(3)             | N2–C1–C2–N1     | 49.9(3)   |
| C10–N11                     | 1.333(3)             | C9–C10–N11–C20  | -9.7(3)   |
| C11–N2–C14                  | 111.7(2)             | O2–C10–N11–C17  | -2.0(3)   |
| C17–N11–C20                 | 110.8(2)             | N10–C9–C10–N11  | -39.1(3)  |
| O1–C1–N2–C14                | -0.3(3)              | C8–C9–C10–O2    | -35.4(3)  |
| <b>3b·H<sub>2</sub>O</b>    |                      |                 |           |
| C1–O1                       | 1.245(3)             | C2–C1–N2–C11    | 8.7(4)    |
| C1–N2                       | 1.341(3)             | O1–C1–C2–C3     | 41.2(3)   |
| C10–O2                      | 1.222(3)             | N2–C1–C2–N1     | 45.9(3)   |
| C10–N11                     | 1.332(3)             | C9–C10–N11–C21  | 12.4(4)   |
| C11–N2–C15                  | 113.3(2)             | O2–C10–N11–C17  | -6.5(4)   |
| C17–N11–C21                 | 112.9(2)             | N10–C9–C10–N11  | -88.7(3)  |
| O1–C1–N2–C15                | 0.4(4)               | C8–C9–C10–O2    | -81.8(3)  |
| <b>3f</b>                   |                      |                 |           |
| C1–O1                       | 1.230(3)             | C2–C1–N2–C11    | -12.7(4)  |
| C1–N2                       | 1.349(4)             | N2–C1–C2–N1     | -62.6(3)  |
| C10–O2                      | 1.235(3)             | O1–C1–C2–C3     | -61.2(3)  |
| C10–N11                     | 1.354(3)             | O2–C10–N11–C22A | -7.5(4)   |
| C11–N2–C16A                 | 109.5(2)             | C9–C10–N11–C17  | -11.1(4)  |
| C17–N11–C22A                | 108.9(2)             | N10–C9–C10–N11  | -48.2(4)  |
| O1–C1–N2–C16A               | -7.1(4)              | C8–C9–C10–O2    | -47.5(3)  |



## Appendix A.

**Table S31.**  $^{13}\text{C}$  NMR chemical shifts for C=O carbon atoms and absorption maxima of the band of valence vibrations of C(O) groups in the IR spectra of compounds **3a-c** and **3f-g** in crystalline state and solutions.

| Compound  | NMR $^{13}\text{C}$ ( $\text{CDCl}_3$ ), $\delta_{\text{C=O}}$ , ppm | $\nu_{\text{C=O max}}$ in solid, $\text{cm}^{-1}$ | $\nu_{\text{C=O max}}$ in $\text{CCl}_4$ , $\text{cm}^{-1}$ |
|-----------|----------------------------------------------------------------------|---------------------------------------------------|-------------------------------------------------------------|
| <b>3a</b> | 164.9                                                                | 1622                                              | 1634                                                        |
| <b>3b</b> | 166.0                                                                | 1627                                              | 1638                                                        |
| <b>3c</b> | 167.6                                                                | 1631                                              | 1636                                                        |
| <b>3f</b> | 164.6                                                                | 1639                                              | 1649                                                        |
| <b>3g</b> | 166.9                                                                | 1638                                              | 1647                                                        |
| <b>3h</b> | N/A                                                                  | 1674                                              | 1674                                                        |

## References

- 1 T. G. Battye, L. Kontogiannis, O. Johnson, H. R. Powell, A. G. W. Leslie. *Acta Cryst.* **2011**, *D67*, pp. 271–281, <http://dx.doi.org/10.1107/S0907444910048675>
- 2 P. Evans. *Acta Cryst.* **2006**, *D62*, pp. 72–82, <https://doi.org/10.1107/S0907444905036693>
- 3 a) G. M. Sheldrick. *Acta Cryst.* **2015**, *C71*, pp. 3–8, <https://doi.org/10.1107/S2053229614024218>; b) G.M. Sheldrick. *Acta Cryst.* **2015**, *A71*, pp. 3–8, <https://doi.org/10.1107/S2053273314026370>
